# Supplementary material for: Solution Structure and Conformational Flexibility of a Polyketide Synthase Module
Source: PubMed Central journal article supplement — JACS Au. 2021 Oct 18;1(12):2162–71. doi: 10.1021/jacsau.1c00043 (PMC8717363; doi:10.1021/jacsau.1c00043), 2021-10-18
Supplement: au1c00043_si_001.pdf [file au1c00043_si_001.pdf]

# Supporting Information

## ***Solution Structure and Conformational Flexibility of a Polyketide Synthase Module***

*Maja Klaus<sup>a+</sup> and Emanuele Rossini<sup>b+</sup>, Andreas Linden<sup>c,d</sup>, Karthik S. Paithankar<sup>a</sup>, Matthias Zeug<sup>a</sup>, Zoya Ignatova<sup>e</sup>, Henning Urlaub<sup>c,d</sup>, Chaitan Khosla<sup>f\*</sup>, Jürgen Köfinger<sup>b</sup>, Gerhard Hummer<sup>b,g\*</sup>, and Martin Grininger<sup>a\*</sup>*

<sup>a</sup> *Institute of Organic Chemistry and Chemical Biology, Buchmann Institute for Molecular Life Sciences, Goethe University Frankfurt, Max-von-Laue Str, 15, 60438 Frankfurt am Main, Germany*

<sup>b</sup> *Department of Theoretical Biophysics, Max Planck Institute of Biophysics, Max-von-Laue Str, 3, 60438 Frankfurt am Main, Germany,*

<sup>c</sup> *Max Planck Institute for Biophysical Chemistry, Am Fassberg 11, 37077, Goettingen, Germany*

<sup>d</sup> *Institute for Clinical Chemistry, University Medical Center Göttingen, Robert Koch Strasse 40, 37075, Goettingen, Germany*

<sup>e</sup> *Institute for Biochemistry and Molecular Biology, University of Hamburg, Notkestr, 85, 22607 Hamburg, Germany*

<sup>f</sup> *Department of Chemistry, Stanford ChEM-H, Department of Chemical Engineering Stanford University, Stanford, California 94305, United States*

<sup>g</sup> *Institute of Biophysics, Goethe University Frankfurt, Max-von-Laue Str, 1, 60438, Frankfurt am Main, Germany*

## Materials and Methods

### Additional Notes

Note 1 – SAXS analysis of construct *A* and *B*.

Note 2 – Correction for protein aggregation in solution and radius of gyration of  $A_{\text{ext}}$  and  $A_{\text{arch}}$ .

Note 3 – Simulations of the arch-shaped architecture at different temperatures.

Note 4 – Flexibility of KR in  $A_{\text{ext}}$  and  $A_{\text{arch}}$ .

Note 5 – Cross-link validation.

Note 6 – General cross-link statistics of  $A_{\text{ext}}$  and  $A_{\text{arch}}$ .

Note 7 – The BioEn intensities of  $B_{\text{ext}}$  match the experiment.

Note 8 – Flexibility of KR1, ACP1 and KR in  $B_{\text{ext}}$ .

Note 9 – Differences in cross-links between holo- and apo-constructs .

Note 10 –  $B_{\text{ext}}$  agrees with measured XL-MS data

Note 11 – XL-MS data can be transferred across constructs *A* and *B*.

Note 12 – Turnover analysis of phage display enriched mutants.

Note 13 – Analysis of Second Generation ACP1 Libraries.

20 Supplementary Figures

10 Supplementary Tables

1 Supplementary Movie

## Materials and Methods:

**Reagents.** For cloning: CloneAmp HiFi PCR Premix (Takara); primers were synthesized by Sigma Aldrich; the GeneJET Plasmid Miniprep Kit and the GeneJET Gel Extraction Kit from Thermo Scientific were used for DNA purification; Stellar Competent Cells were from Takara and One Shot® BL21 (DE3) Cells were from Invitrogen. Protein purification: All chemicals for buffer preparations were from SigmaAldrich; Isopropyl- $\beta$ -D-1-thiogalactopyranoside (IPTG), carbenicillin and spectinomycin were from Sigma Aldrich/Carl Roth; LB broth (Lennox) and 2xYT media for cell cultures were from Carl Roth; Ni-NTA affinity resin (Clontech); the HiTrapQ column for anion exchange chromatography was from GE Healthcare; Amicon Ultra centrifugal filters (Millipore). PKS enzymatic assay: Coenzyme A (CoA), reduced  $\beta$ -nicotinamide adenine dinucleotide 2'-phosphate (NADPH), methylmalonic acid, malonic acid, and magnesium chloride hexahydrate were from Carl Roth. Adenosine-5'-triphosphate (ATP) was from SigmaAldrich. Reducing agent tris(2-carboxyethyl)-phosphine (TCEP) was from Thermo Fisher Scientific. UV-Star half area microtiter plates (Greiner). Phage Display reagents: For phage display protocols <sup>1</sup>, T4 polynucleotide kinase, T7 DNA polymerase, T4 DNA polymerase, 40 mM dNTP mix, and M13K07 helper phage were from NEB. The QIAprep Spin M13 Kit and the QIAquick Gel Extraction Kit were from Qiagen. Mouse monoclonal anti-M13-HRP antibody (horseradish peroxidase conjugated) was from GE Healthcare 3,3',5,5'-Tetramethylbenzidine (TMB) Liquid Substrate System was from Sigma Aldrich. Competent SS230 and CJ236 cells were purchased from Lucigen and XL1 Blue cells from Agilent Technologies.

**Plasmids.** Plasmids harboring genes encoding individual PKS modules were generated in this study via In-Fusion Cloning (Takara) and restriction and ligation-based techniques. Tables S10 specifies the primer sequences and the resulting plasmids. Plasmids pMK53 and pADD01 were used for expression of construct *A* resp. construct *B*. Plasmids sequences were verified by DNA sequencing (SeqLab). Gene sequences were ordered from Thermo Fisher Scientific.

**Bacterial Cell Culture and Protein Purification.** All PKS proteins were expressed and purified using similar protocols. For *holo*-proteins (where the ACP domain is post-translationally modified with a phosphopantetheine arm) *E. coli* BL21 cells were co-transformed with a plasmid encoding for the phosphopantetheine transferase Sfp from *B. subtilis* (pAR357 <sup>2</sup>). Proteins either contained a C-terminal His<sub>6</sub>-tag or an N-terminal MBP-tag for purification. Cultures were grown on a 1-2 L scale in 2xYT media at 37 °C to an OD<sub>600</sub> of 0.3, whereupon the temperature was adjusted to 18 °C. At OD<sub>600</sub> of 0.6, protein production was induced with 0.1 mM IPTG, and the cells were grown for another 18 h. Cells were harvested by centrifugation at 5000 g for 15 min and lysed by French Press (lysis buffer: 50 mM sodium phosphate, 10 mM imidazole, 450 mM NaCl, 10% glycerol, pH 7.6 (without imidazole for MBP-tagged proteins). The cell debris was removed by centrifugation at 50,000 g for 50 min. The supernatant was further purified using affinity chromatography. For Ni-NTA chromatography (column volume 5 mL) the supernatant was applied to the column, a first wash step was performed with the above lysis buffer (10 column volumes), followed by a second wash step using 10 column volumes of wash buffer (50 mM phosphate, 25 mM imidazole, 300 mM NaCl, 10 % glycerol, pH 7.6). Proteins were eluted with 6 column volumes elution buffer (50 mM phosphate, 500 mM imidazol, 10% glycerol, pH 7.6). MBP-tagged proteins were purified using 5 mL amylose resin per 2 L of culture. After applying the lysate, the column was washed with 12 column volumes of lysis buffer prior to elution with 6 column volumes of lysis buffer containing 10 mM maltose. Twin-Strep-tagged proteins (KS3-AT3 for phage display) were purified using 5 mL StrepTactin column. The column was washed with 5 CV lysis buffer to elution with 3 column volumes lysis buffer containing 2.5 mM desthiobiotin.

Eluates from His<sub>6</sub>-tag, Strep-tag and MBP-tag purifications were further purified by anion exchange chromatography using a HitrapQ column on an ÄKTA FPLC system. Buffer A consisted of 50 mM

phosphate, 10% glycerol, pH 7.6, whereas buffer B contained 50 mM phosphate, 500 mM NaCl, 10% glycerol, pH 7.6. The proteins were further purified using size exclusion chromatography (SEC). For SEC, an ÄKTA FPLC system using a Superose 6 Increase 10/300 GL column in buffer B was used. Enzymes *S. coelicolor* malonyl-CoA synthetase (MatB) and *S. coelicolor* methylmalonyl-CoA epimerase (SCME) were purified as described<sup>3</sup>. Protein concentrations were determined with the BCA Protein Assay Kit (Thermo Scientific). Samples were stored as aliquots at -80 °C until further use.

### Synthesis of (2*S*, 3*R*) 3-hydroxy-2-methylpentanoyl-*S*-*N*-acetylcysteamine thioester (**1**) (provided by Mirko Joppe)

Diketide SNAC **1** was synthesized via compound (4*S*, 2'*S*, 3'*R*)-3-(2'-Methyl-3'-hydroxypentanoyl)-4-benzyl-2-oxazolidinone (**S2**) following protocols of Sharma et al.<sup>4</sup> and Peter et al.<sup>5</sup>

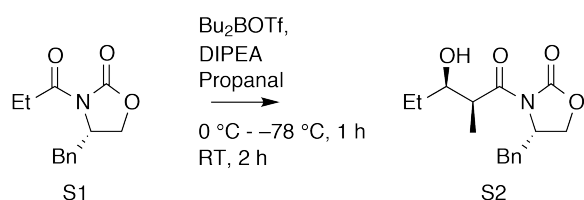

**S2**: Yield: 69 % (4.3 g), white crystals.

$^1\text{H NMR}$  (400 MHz,  $\text{CDCl}_3$ )  $\delta$  = 7.37-7.21 (m, 5H), 4.75-4.69 (m, 1H), 4.27-4.19 (m, 2H), 3.90-3.86 (m, 1H), 3.81 (dq,  $J$  = 2.7, 7.0 Hz, 1H), 3.27 (dd,  $J$  = 3.4, 13.5 Hz, 1H), 2.81 (dd,  $J$  = 9.4, 13.4 Hz, 1H), 1.65-1.43 (m, 2H), 1.27 (d,  $J$  = 7.0 Hz, 3H), 0.99 (t,  $J$  = 7.5 Hz, 3H) ppm.

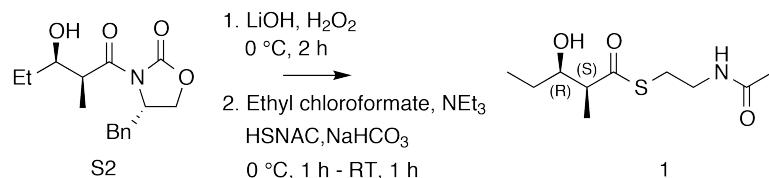

**1**: Yield: 33 % (128 mg), clear liquid.

$^1\text{H NMR}$  (400 MHz,  $\text{CDCl}_3$ )  $\delta$  = 5.76 (s, br, 1H), 3.88-3.83 (m, 1H), 3.53-3.41 (m, 2H), 3.10-2.99 (m, 2H), 2.78-2.72 (m, 1H), 1.98 (s, 3H), 1.57-1.43 (m, 2H), 1.23 (d,  $J$  = 7.0 Hz, 3H), 0.99 (t,  $J$  = 7.4 Hz, 3H) ppm. MS (ESI+) found 234.12, for  $[\text{M}+\text{H}]^+$  calculated 234.12; found 256.24, calculated for  $[\text{M}+\text{Na}]^+$  256.10.

**Enzymatic Assays.** PKS enzymatic assay of KR1-ACP1-M2-TE was performed according to published procedures<sup>6</sup>. KR1-ACP1-M2-TE was used at 4  $\mu\text{M}$  final concentration and enzymes MatB and SCME for *in situ* substrate generation were used at final concentrations of 4  $\mu\text{M}$  and 8  $\mu\text{M}$ , respectively. (2*S*,3*R*)-2-methyl-3-hydroxy-diketide-SNAC (5 mM) served as a starting substrate to prime the reaction<sup>4,7</sup>. After certain time points, reactions were quenched with ethylacetate and the resulting product extracted twice with 450  $\mu\text{L}$  dried *in vacuo* and submitted for LC-MS analysis.

**Liquid Chromatography-Mass Spectrometry Analysis of Triketide Products.** Dried samples were reconstituted in 100  $\mu\text{L}$  methanol, separated on a Acquity UPLC BEH C18 1.7  $\mu\text{m}$  RP 2.1 x 50 mm column (Waters) with an Acquity UPLC BEH C18 1.7  $\mu\text{m}$  RP 2.1 x 5 mm pre-column (Waters), connected to an Ultimate 3000 LC (Dionex) HPLC over a 16 min linear gradient of acetonitrile from 5% to 95% in water. Separated samples were injected into an AmaZonX (Bruker) equipped with an

ESI Source set to positive ionization mode. The reduced triketide product was located by searching for the theoretical  $m/z$  for the  $[M+Na]^+$ - and  $[M+H]^+$ -ion.  $[M+Na]^+ = 195.100$  and  $[M+H]^+ = 173.118$ .

**Tandem Size Exclusion Chromatography and Small Angle X-Ray Scattering.** SEC-SAXS analysis was performed on the Bio-SAXS beamline BM29 at the European Synchrotron Radiation Facility (ESRF) <sup>8</sup>. All measurements were performed in a buffer consisting of 50 mM sodium phosphate, 500 mM NaCl, 5% glycerol, pH 7.55 using a Superose 6 Increase 10/300 GL column. Details of SAXS data collection and analysis are listed in Table S3.

**Cross-link Mass-Spectrometric Analysis.** We tested the homobifunctional crosslinkers bis(sulfosuccinimidyl)suberate (BS3) and disuccinimidyl suberate (DSS), as well as the heterobifunctional reagent NHS-Diazirine/succinimidyl 4,4-azipentanoate (SDA) on MBP-M2(2) for their ability to capture crosslinks, and initially judged crosslinking efficiency by SDS-PAGE (data not shown). BS3 or DSS showed few crosslinks, which we attributed to the low number lysine residues present in the DEBS core of the protein. The photoactive reagent SDA performed better in this regards owing to its reaction with primary amino groups of e.g. lysines and insert under radical formation into C-C and C-heteroatom bonds. By taking into consideration the lysine chain length, the 3.9 Å spacer, the chain length of long amino acids (e.g. lysine and arginine), and conformational flexibility, a maximum  $\alpha$ - $\alpha$  distance of 20 Å is achieved.

*SDA cross-linking:* 150 to 175 µg of construct A and B at a final protein concentration of 1 µg/µL or less were incubated with 2 mM SDA (100 mM stock in DMSO) for 30 min at room temperature, in a buffer consisting of 50 mM sodium phosphate, 500 mM NaCl, 10% glycerol, pH 7.55 (construct A) or 200 mM sodium phosphate, 200 mM NaCl, 10% glycerol, pH 7.55 (construct B, second experiment). The cross-linking reactions were quenched with 50 mM Tris-HCl. The samples were dialyzed against reconstitution buffer via a membrane filter (MF Membrane Filters, 0.025 µm VSWP, Merck). Afterwards, samples were irradiated with UV light (365 nm) for 5 min at 4 °C.

*Protein Digestion and Enrichment of Cross-linked Peptides:* Proteins of cross-linked samples were reduced and alkylated with 10 mM DTT and 40 mM iodoacetamide, respectively. Proteins were digested by trypsin in an enzyme-to-protein ratio of 1:50 at 37 °C overnight at a final concentration of 1 M urea. Peptides were acidified with trifluoroacetic acid (TFA) to a final concentration of 0.5% (v/v), desalted on MicroSpin Columns (Harvard Apparatus) following manufacturer's instructions and vacuum dried. Peptides were resuspended in 50 µL 30% acetonitrile (v/v)/0.1% TFA (v/v) to enrich cross-linked peptide species by peptide size exclusion chromatography (SuperdexPeptide 3.2/300 column, GE Healthcare). Fractions of 50 µL were collected at a flow rate of 50 µL/min and those that eluted first and contained the cross-linked peptide pairs were subjected to LC-MS/MS analysis.

*LC-MS/MS Analysis:* Cross-linked peptides were measured in technical duplicates on an Orbitrap Fusion Tribrid Mass Spectrometer or on a Q Exactive HF-X coupled to a Dionex UltiMate 3000 UHPLC system (Thermo Fisher Scientific) equipped with an in house-packed C<sub>18</sub> column (ReproSil-Pur 120 C<sub>18</sub>-AQ, 1.9 µm pore size, 75 µm inner diameter, 30 cm length, Dr. Maisch GmbH). Samples were separated applying the following gradient: mobile phase A consisted of 0.1% formic acid (FA, v/v), mobile phase B of 80% ACN/0.08% FA (v/v). The gradient started at 5% B, increasing to 12, 15 or 20% B within 3 min (according to fraction), followed by a continuous increase to 46% B within 45 min, then keeping B constant at 90% for 8 min. After each gradient the column was again equilibrated to 5% B for 2 min. The flow rate was set to 300 nL/min. MS1 survey scans were acquired in the orbitrap (OT) with a resolution of 120,000, an injection time (IT) of 60 ms (50 ms on HF-X) and an automatic gain control (AGC) target of 5×10<sup>5</sup>. Dynamic exclusion was set to 10 s

(30 s on HF-X) and only charge states between +3 and +8 were considered for fragmentation. MS2 spectra were acquired in the OT of the 20 (25 on HF-X) most abundant precursor ions, resolution 30,000, IT 128 ms and AGC target  $5 \times 10^4$ . Fragmentation was enforced by higher-energy collisional dissociation (HCD) at 30%.

*Data Analysis:* ProteomeDiscoverer 1.4 (Thermo Fisher Scientific) was used for converting raw files into .mgf format (signal-to-noise ratio 1.5, 1000–10000 Da precursor mass). The generated .mgf files were subjected to pLink v. 1.23 (pFind group)<sup>9</sup> to identify cross-linked peptides. Here, default settings were applied with carbamidomethylation of cysteines as fixed and oxidation of methionines as variable modification. FDR was set to 0.01. SDA was selected as cross-linker. All spectra were evaluated manually.

**Protein Homology Modeling.** We constructed homology models of the different protein domains of DEBS using MODELLER version 9.16<sup>10</sup>. The X-ray crystallographic structures of *S. erythraea* KS-AT<sub>2</sub> (PDB ID: 2hg4, 2qo3, 6c9u)<sup>6, 11-12</sup>, KR2 (2fr0, 2fr1)<sup>13</sup>, ACP2 (2ju2)<sup>14</sup>, and DD (1pzq)<sup>15</sup> were used as templates. The C-terminus 1883:1914 region (DD) was not modeled due to alignment mismatch. A three-dimensional structure was already available for the domains MBP (1anf)<sup>16</sup>, KR1 (2fr0)<sup>13</sup>, ACP2 (2ju2)<sup>14</sup>, and TE (1mo2)<sup>17</sup>. For each protein domain we constructed a set of  $2 \times 10^2$  models. The homology models were then selected based on their discrete optimized protein energy (DOPE) score. Pymol software was used for visual inspection of the selected structures<sup>18</sup>.

**Construction of the *in silico* Starting Models (Fig. S5).** *Model ext:* We built initial structural arrangements for A<sub>ext</sub> and B<sub>ext</sub> as informed by previous SAXS investigations of DEBS<sup>19</sup>. Both models carry an extended conformation of KS-AT<sub>2</sub> and their post-AT linkers are fully structured as produced by the homology modeling. The non-native MBP domains were located N-terminally of the KS. The length of the modeled domains is highlighted in Table S9. The models were constructed using the software Chimera<sup>20</sup>.

*Model arch:* The initial structural arrangement of A<sub>arch</sub> was constructed by docking the modeled protein domains within the cryoEM density of the related PikAIII complex (EMD-5664)<sup>21-22</sup>. The rigid docking was performed using the software Chimera<sup>20</sup>. To obtain an arched conformation, we separately docked a KS dimer and two copies of LD-AT generated from the extended KS-AT<sub>2</sub> homology model as informed from PikAIII complex<sup>22</sup>. Next, we merged the structures of the split domains to reconstruct the full KS-AT<sub>2</sub> domain. The post-AT linkers were not resolved within the cryoEM density and excluded from the docking<sup>22</sup>. We then docked the remaining KR, ACP, and DD domains within the density. The initial conformation of the native A<sub>arch</sub> displays a cross-correlation to the density equal to 0.71 (Fig. S6). The non-native MBPs were located at the N-terminal regions of KS-AT<sub>2</sub> using the software Chimera<sup>20</sup>. The length of the modeled domains is highlighted in Table S9.

**Coarse-Grained Simulations.** We generated a canonical ensemble of models A<sub>ext</sub>, A<sub>arch</sub>, and B<sub>ext</sub> using Monte Carlo (MC) simulations based on coarse-grained (CG) potential energies<sup>23</sup>. Folded protein domains were treated as rigid bodies described by one interaction site per residue located at their C $\alpha$  atoms. The protein domains were linked by flexible linkers represented as Gaussian chain polymers and placed in a cubic box of 50 nm size. The solvent dielectric constant was set to  $\epsilon=80$ . The post-AT regions of A<sub>arch</sub> were modeled as flexible linkers (Table S9). We kept KS-AT<sub>2</sub> frozen and used step sizes of 3 Å and 3.14 rad for the MC translational and rotational movements of all other domains. For all models, conformations were sampled in a temperature replica-exchange simulation scheme covering the range of 298 to 598 K in steps of 20 K. For A<sub>arch</sub>, we also performed replica-exchange simulations collecting replicas between 298 and 398 K every 20 K to preserve the

arch-shaped conformation otherwise disrupted at higher temperatures (Note 2). For each model, after an initial equilibration, a total of  $9.0 \times 10^5$  MC conformations were produced to exhaustively sample relevant conformations. To augment model flexibility and the sampled conformational space of the models, only the conformations produced at highest temperature were considered for further analysis.  $A_{\text{arch}}$  conformations sampled at 598 K are denoted as  $A_{\text{arch}}^{598}$ .

**Computation of SAXS Intensities.** We computed the SAXS intensities for each of the individual CG conformations using the package FoXS<sup>24-25</sup>.

**Ensemble Refinement of SAXS Intensities.** We used the Bayesian Inference of Ensembles (BioEn) method to determine the statistical weights of  $A_{\text{ext}}$ ,  $A_{\text{arch}}$ , and  $B_{\text{ext}}$  ensembles of conformations underlining the measured SAXS intensities<sup>26-28</sup>. BioEn refinement optimizes the weights of the structures in the ensemble to improve the agreement with experimental intensities while keeping the distribution close to the reference. We performed the BioEn computations considering the SAXS intensities in the range of  $0.02 < q < 0.3 \text{ \AA}^{-1}$ . We used L-curve analysis to identify the confidence parameter  $\theta$  for an optimal tradeoff between the consistency of simulated and experimental data (chi-squared metric  $\chi^2$ ) and changes in weights based on relative entropy  $S_{\text{KL}}$  (Fig. S7). From the scattering curves, the radius of gyration  $R_g$  was calculated using the Guinier approximation<sup>29</sup>. We reduced the sampled ensembles to the conformations that together fulfill more than 99% of the statistical cumulative weight for evaluation of the measured cross-links (Fig. S5).

**Correction for Protein Aggregation in Solution.** Systematic deviations between the measured and simulated scattering curves at low  $q$  range suggested moderate aggregation of the systems in solution (Fig. S2 and S8). To quantify and account for the fraction of aggregation, we combined each simulated curve with the intensities of a globular model at a statistical weight that matched the experiment. We approximated the globular aggregate in solution as a sphere and considered the BioEn intensities at low  $q$  range between 0 and  $0.02 \text{ \AA}^{-1}$ . We optimized the radius of gyration of the sphere,  $R_g^{\text{sph}}$ , and its statistical weight,  $w_{\text{sph}}$ , to match the experimental data as:

$$I_{\text{sph}}(q) = \frac{9 \left( \sin(qR_g^{\text{sph}}) - qR_g^{\text{sph}} \cos(qR_g^{\text{sph}}) \right)^2}{(qR_g^{\text{sph}})^6}$$

$$I_{\text{agg}}(q) = (1 - w_{\text{sph}})I_{\text{BioEN}}(q) + w_{\text{sph}} \frac{I_{\text{sph}}(q)}{I_{\text{sph}}(0)} I(0)$$

with  $q$  the scattering angle and  $I_{\text{agg}}(q)$  the intensity of the complex in solution,  $I_{\text{BioEN}}(q)$  the BioEn intensities, and  $I_{\text{sph}}(q)$  the intensities of the sphere,  $I_{\text{sph}}(0)$  the sphere intensity at zero  $q$ , and  $I(0)$  the intensity prefactor at zero  $q$  (see also SI Note 1).

**Quantification of Module Flexibility.** We evaluated the flexibility across the conformations that explain 90% of the BioEn scattering curves (Fig. 2). For each ensemble, we monitored the distance of the center of mass of the KR domains between the conformations along the ranking and the one with highest statistical weight. Similarly, we evaluated the flexibility of the MBP of  $A_{\text{ext}}$ , and the KR1 and ACP1 domains of  $B_{\text{ext}}$ .

**Structural Mapping of the XL-MS data.** We mapped the measured cross-links of construct *A* over the 1000  $A_{\text{ext}}$  and  $A_{\text{arch}}$  conformations ranked by weight that fulfill 99.9% of the BioEn scattering curves. For all selected conformations, we calculated the  $C\alpha$  pair-distances across the reported cross-linked residues. Additionally, we quantified the frequencies of interaction across all exposed

residues of KS-AT<sub>2</sub> and MBP in A<sub>ext</sub>. To account for the CG level of theory of the simulations, the residues were considered interacting if their Ca atoms were located within a distance of 21 Å. The same analysis was performed to map the measured XL-MS data of construct *B* over the 5000 conformations of model B<sub>ext</sub> that fulfill 99% of the BioEn scattering curve. To evaluate transferability of the XL-MS data across the different constructs, we additionally mapped the 1000 top-ranked B<sub>ext</sub> conformations (92% in cumulative weight) on the XL-MS data measured for construct *A*. We then quantified the frequencies of interaction across the rigid domains shared across the two constructs.

**Explorative Analysis.** We used the Python libraries Numpy<sup>30</sup>, Scipy<sup>31</sup>, Pandas<sup>32</sup>, and MDAnalysis<sup>33-34</sup> to manage cross-link data, derive the bead coordinates along the CG trajectories, and perform distance computations. We used the Python library Matplotlib for the visualization of our results<sup>35</sup>. We used VMD and Pymol to visualize the simulated frames<sup>18,36</sup>.

**Phage Display Methodology.** Phage display experiments were carried out according to the protocol described by Tonikian *et al.*<sup>1</sup>. Specific experimental setup is described below.

*Library generation:* A library of ACP1(2) mutants fused to the N-terminus of the minor coat protein P3 of the M13 bacteriophage was generated as described before<sup>1</sup>. A primer for randomization of five amino acids in the chain translocation epitope of ACP1 was designed using NNK at the target positions (P-MK162: 5' CTG GCG TCG CTG CCC GCG NNK GAG CGC NNK NNK GCG CTG TTC NNK CTC GTG CGC NNK CAC GCG GCC GCC GTC CTC 3' (N: A/C/G/T K: G/T).

*Biopanning:* For all panning steps a buffer containing 50 mM sodium phosphate, 150 mM NaCl, pH 7.55 was used. All incubations were done at room temperature while shaking at 200 rpm. Panning was performed in a StrepTactinXT coated microtiter plate. As a first step, four wells were coated with (3)KS3-AT3--Strep (100 µL at 5 µg/mL) for 2 h. Afterwards, the plate was blocked using 200 µL of blocking buffer (50 mM sodium phosphate, 150 mM NaCl, 0.5% BSA, 0.05% Tween20, pH 7.55). At the same time the purified phage library was also blocked in the same buffer (procedure as described as before<sup>1</sup>). The blocked phage library (100 µL per well) was incubated for 1 h on the coated and blocked wells, prior to washing with 200 µL of wash buffer (50 mM sodium phosphate, 150 mM NaCl, 0.05% Tween20, pH 7.55). Wash steps were increased each round over the course of the panning protocol (10x, 12x, 14x, 16x, 18x). Elution of bound phage was done with 100 µL of 100 mM hydrochloric acid for 20 min. The eluted phage were collected and the solution neutralized by adding 1/10 volume of 1 M tris base pH 8.0 and 1/10 volume of blocking buffer. The elution was propagated and the titer was determined.

For propagation 2 mL of log phase *E. coli* SS320 (OD<sub>600</sub> 0.8) were added to 200 µL of eluted phage and infection was allowed for 30 min and 37 °C, 200 rpm whereupon 20 µL M13K07 helper phage (1.0x10<sup>12</sup> PFU/mL) were added. Following incubation for 1h at 37 °C, 200 rpm 45 mL of 2xYT/carb/kan were added to the culture and cells continued to grow over night. The next day, phages were harvested by centrifugation at 5000 x g for 10 min to remove the cells. Phage particles remained in the supernatant and were precipitated with a solution containing 20% PEG8000 (w/v) and 2.5 M NaCl for 15 min at room temperature. Subsequently, phages were pellet at 13000 x g for 10 min. The pellet containing the phage was resuspended in 1 mL of blocking buffer. Another spin for 5 min at 15000 x g removed the remaining cells. Phages were either stored at 4 °C, or used directly.



*ELISA:* To test the eluted phage for increased and specific binding, a specificity ELISA was performed. Colonies from the target elution rounds were grown in a minitube rack containing 400  $\mu$ L 2xYT/carb/K07 medium (supplemented with  $10^{10}$  PFU/mL M13K07).

A MaxiSorp plate was coated for 2 h at room temperature with 100  $\mu$ L of 2  $\mu$ g/mL target protein (3)KS3-AT3 and as a negative control with BSA. Afterwards the plate was blocked for 1 h with 200  $\mu$ L of blocking buffer (50 mM sodium phosphate, 150 mM NaCl, 0.5% BSA, 0.05% Tween20, pH 7.55), followed by incubation of 100  $\mu$ L of phage containing supernatant from the minitube rack for 1 h. The plate was washed twice with 200  $\mu$ L of wash buffer (50 mM sodium phosphate, 150 mM NaCl, 0.05 % Tween20, pH 7.55), before incubating 100  $\mu$ L of a 1:5000 anti-M13-HRP antibody solution in blocking buffer for 1 h. Following antibody incubation the plate was washed three times before development with 100  $\mu$ L TMB substrate and quenching upon color change with 1 M phosphoric acid. Read out was carried out at 450 nm on a Tecan Synergy HT plate reader.

*Titration ELISA:* To further confirm the relative binding intensity of the newly enriched mutants, a titration ELISA using purified phage was used. Phages were purified out of a 45 mL culture using described protocols <sup>1</sup>. The  $OD_{268}$  was used as a measure to determine phage amounts ( $OD_{268} = 5 \times 10^{12}$  PFU/mL). The phage stock was serially diluted in ELISA blocking buffer and applied to the ELISA plate using the same protocol as described above. The advantage of this assay is that defined phage amounts can be used and the signal can be normalized across different phage preparations.

## Additional SI Notes:

**Note 1 – SAXS analysis of constructs A and B.** Both constructs *A* and *B* elute as a single peaks, but display a fronting shoulder (Fig S2A, B). Construct *A* elutes slightly later than construct *B* (26.77 min / #1627 vs. 26.75 min / #1623), consistent with its lower  $M_w$ . First, a basic SEC-SAXS analysis was conducted to characterize the sample. Data was collected up to  $5 \text{ \AA}^{-1}$ , but truncated at  $3 \text{ \AA}^{-1}$  due to the low signal to noise ratio at high  $q$ . A suitable frame range displaying a stable  $R_g$  at the intensity maximum of the SEC-SAXS peak was selected (Fig S2B). The sample average was generated using frames 1618-1641 for construct *A* and frames 1619-1646 for construct *B*. For buffer correction, two regions to the left and right of the peak were averaged to obtain the background intensity and subtracted from the sample average (frames 215-486 and 2087-2469 for construct *A*; frames 500-750 and 2500-2750 for construct *B*, Fig S2C). Care was taken to not include any contaminations by inspecting the UV trace (Fig S2D).

The Kratky-plots for constructs *A* and *B* display a second peak at  $\sim 7 R_g$ , indicating a multidomain protein, which matches the expectations for a PKS system. The curves converge to 0 at high  $q$ , showing that the bulk of the particles is properly folded, and that they are not overly flexible (Fig. S2E).

The Guinier-region was determined as  $0.5 qR_g - 1.3 qR_g$ , truncating the plot at the canonical  $1.3 R_g$  and omitting the first data points. The downward slope of the scattering profile introduced by these first data points does not resemble inter-particle repulsion but is an artifact arising from beamstop/masking issues. Aggregation and repulsive interactions can be distinguished by the shape of the residuals of the Guinier fit. The upward facing parabola shape of the  $q$ -region extended up to  $q \cdot R_g$  of 3, is indicative of aggregation<sup>37</sup>. Repulsive interactions would show as an downward facing parabola instead.

Both regressions display R-values  $> 0.999$  and a flat distributions of residuals (Fig. S3A). The Guinier-analysis yielded similar results for both constructs. For construct *A*,  $I_0$  was determined as  $157 \pm 1$  and  $R_g$  as  $77.2 \pm 0.2 \text{ \AA}$ . For construct *B*,  $I_0$  and  $R_g$  derived as  $139 \pm 1$  and  $76.6 \pm 0.2 \text{ \AA}$ , respectively (Fig. S3B).

Molecular weight estimates are in agreement with previous reports (Fig. S3B)<sup>19, 38</sup>. Here, the estimates based on the volume of correlation  $V_c$  are in excellent agreement with the  $M_w$  derived from the construct's atomic composition<sup>39</sup>. The integrated intensities converge at high  $q$ , indicating accurate estimates. The  $M_w$  calculations based on the Porod-volume  $V_p$  are larger than the expected values.  $V_p$  is known to be affected by partially extended/unfolded or non-globular conformations<sup>40</sup>. Computing  $P(r)$  functions with BIFT<sup>41</sup> and GNOM<sup>29</sup> (BioXtas RAW suite<sup>42</sup>) revealed similar pair distance distributions, with good agreement between the experimental and back calculated scattering profiles for construct *B* and the BIFT solution of construct *A* ( $1.057 <\chi^2> 1.087$ ). The GNOM solution of construct *A* displays a slightly higher  $\chi^2$  value of 1.21 and displays slight periodicity in the high  $r$  range. Larger  $D_{\max}$  values for construct *B* than for construct *A* were received, consistent with the increased size/domain number of construct *B*. The sharp descent of the curves for the automated BIFT solutions indicate slight overfitting (Fig 3C). When the  $D_{\max}$  value is adjusted manually in GNOM, the  $P(r)$  functions only slowly converge to 0, indicating either the presence of aggregation in the sample or partial unfolding of the protein. The  $I_0/R_g$  values from the  $P(r)$  function match the Guinier derived values.

The basic sample characterization revealed that the sample is both folded and displays the expected dimeric composition. The constructs behave as expected for modPKS proteins. However, the SEC

procedure could not completely remove minor aggregates from the main fraction. As already the presence of small amounts of aggregation can impair SAXS based calculations, we continued to deconvolute the scattering profiles *in silico*. By this, a larger frame range spanning the complete peak could be considered for modeling (1536-1717 for construct *A*, and 1539-1704 for construct *B*), thus increasing the signal to noise ratio.

**Note 2 – Correction for protein aggregation in solution and radius of gyration of  $A_{\text{ext}}$  and  $A_{\text{arch}}$ .**

For ensemble refinement via BioEN, we used SEC-SAXS frames over the entire dimer elution peak. Systematic deviations between the measured and simulated scattering curves at low  $q$  range suggested moderate aggregation of the systems in solution, as expected (Fig. S2A and S9; see also SI Note 1). To quantify and account for the fraction of aggregation, we combined each simulated curve with the intensities of a globular model at a statistical weight that matched the experiment. We approximated the globular aggregate in solution as a sphere and considered the BioEn intensities at low  $q$  range between 0 and  $0.02 \text{ \AA}^{-1}$ . We optimized the radius of gyration of the sphere,  $R_g^{\text{sph}}$ , and its statistical weight,  $w_{\text{sph}}$ , to match the experimental data as:

$$I_{\text{sph}}(q) = \frac{9 \left( \sin(qR_g^{\text{sph}}) - qR_g^{\text{sph}} \cos(qR_g^{\text{sph}}) \right)^2}{(qR_g^{\text{sph}})^6}$$

$$I_{\text{agg}}(q) = (1 - w_{\text{sph}})I_{\text{BioEN}}(q) + w_{\text{sph}} \frac{I_{\text{sph}}(q)}{I_{\text{sph}}(0)} I(0)$$

with  $q$  the scattering angle and  $I_{\text{agg}}(q)$  the intensity of the complex in solution,  $I_{\text{BioEN}}(q)$  the BioEn intensities, and  $I_{\text{sph}}(q)$  the intensities of the sphere,  $I_{\text{sph}}(0)$  the sphere intensity at zero  $q$ , and  $I(0)$  the intensity prefactor at zero  $q$  (see also SI Note 1).

The  $R_g$ -value calculated from SEC-SAXS frames over the entire dimeric elution peak is  $79.8 \text{ \AA}$  for construct *A*. Computed  $R_g$  values from the BioEn scattering curves, based on the Guinier approximation, for  $A_{\text{ext}}$  and  $A_{\text{arch}}$  were equal to  $67.6 \text{ \AA}$  and  $64.0 \text{ \AA}$ , respectively. When accounting for the fraction of protein aggregation and correcting the BioEn scattering curves, the  $R_g$ -value computed for  $A_{\text{ext}}$  in presence of aggregation was equal to  $79.6 \text{ \AA}$ . The value perfectly agrees with the experimental data. The computation predicts an aggregate present in solution with  $R_g^{\text{sph}}$  of  $152.7 \text{ \AA}$  at a fraction of 6.9%. When the fraction of aggregation predicted for  $A_{\text{ext}}$  was applied to  $A_{\text{arch}}$ , it resulted in  $R_g \approx 76.7 \text{ \AA}$ , thus matching the experimental data less well (Fig. 2). For  $A_{\text{arch}}$ , a spherical model with  $R_g^{\text{sph}}$  of  $144.0 \text{ \AA}$  and a fraction of aggregates in solution equal to 10.1% are required to obtain a  $R_g$  closer to experiment and equal to  $81.0 \text{ \AA}$  (Fig. S9 & S11). The scattering curve of  $A_{\text{arch}}$  obtained at 598 K ( $A_{\text{arch}}^{598}$ , disrupting the arch-shaped fold) match the experimental Guinier region with a  $R_g$  of  $79.6$  at 7.1% aggregation and  $R_g^{\text{sph}}$  of  $153.7 \text{ \AA}$  (Fig. S8).

In all cases, a simple model for an aggregate is sufficient to gently refine our physically meaningful simulation ensembles of conformers to fit the data. Moreover, the inferred aggregate sizes are much larger than the conformers in the structural ensembles and the statistical weights of the aggregates are small in all cases. These results provide strong evidence that our simple model of the aggregate is adequate and that the scattering intensities at larger  $q$ -values are not affected by aggregation.

**Note 3 – Simulations of the arch-shaped architecture at different temperatures.** We simulated  $A_{\text{arch}}$  in two alternative rigid-body temperature Replica-Exchange simulations ranging from 298 K to 398 K and from 298 K to 598 K, respectively. For both simulations, we analyzed the

conformations produced at the highest temperature to augment the sampled conformational space. The conformations produced at 398 K retain the arch-shaped architecture, although the flexible post-AT linkers allow occasional formation of globular models with KR approaching KS more closely (Fig. 2). The conformations relaxed at 598 K, here defined  $A_{\text{arch}}^{598}$ , disrupt the structural organization of the cryoEM density (Fig. S7). The  $A_{\text{arch}}^{598}$  scattering curves match the experimental Guinier region when accounting for protein aggregation in solution of 7.1 % and  $R_g^{\text{sph}}$  of 153.7 Å (SI Note 2). Analogously to  $A_{\text{arch}}$ , discrepancies from experimental data are highlighted at  $q$  values ranging from 0.05 and 0.1 Å<sup>-1</sup> (Fig. 2, S9, S10 & S11). After refinement, 5 conformations together explain 90% of the fitting and the  $A_{\text{arch}}^{598}$  conformation ranked at highest statistical weight is rather globular (Fig. S11). Compared to the other models,  $A_{\text{arch}}^{598}$  displays the highest KR flexibility with an average value of 36.0 Å (Fig. S11). Such flexibility results in irrelevant architectures where KR deeply leaks towards KS-AT<sub>2</sub> and excises the N-terminal region of the module (Fig. S11). Having the general topology of module 2 disrupted,  $A_{\text{arch}}^{598}$  was not considered for further structural analysis.

**Note 4 – Flexibility of KR in  $A_{\text{ext}}$  and  $A_{\text{arch}}$ .** We monitored the flexibility of the KR domains across the conformations that jointly explain 90% of the BioEn fittings (Fig. S12).  $A_{\text{ext}}$  displays high KR mobility with an average distance from the reference of 16.1 Å. With its large mobility, the model provides a convenient platform to investigate the conformational space sampled through CG simulation. The KR average distance of  $A_{\text{arch}}$  at 398 K is equal to 11.2 Å and two clusters are displayed (Fig. S12). A total of 8 over 56  $A_{\text{arch}}$  conformations ranked at high weight disrupt the cryoEM conformation, contributing together to 19% of the fitting. Alternatively, 48 conformations preserve the fully arch-shaped conformation. These conformations display an average distance of 3.6 Å and contribute together to explain 71% of the fitting. The arch-shaped organization emerges as a stable architecture that, however, does not fully match the experimental SAXS data.

**Note 5 – Cross-link validation.** The structures used to build the models match 83% of the cross-links measured within single protein domains. This confirms the high specificity of the measured data (Table S5). Based on these results, we used the cross-links measured across different protein domains to locate and describe candidate regions of DDI.

**Note 6 – General cross-link statistics of  $A_{\text{ext}}$  and  $A_{\text{arch}}$ .** A total of 62 cross-links were measured across the different protein domains of construct A. We mapped the measured data over 1000  $A_{\text{ext}}$  and  $A_{\text{arch}}$  conformations that contributed to 99.9% of the BioEn fittings.  $A_{\text{ext}}$  originally satisfied 46 cross-links (Table S6). MBP displays high flexibility and so we excluded the cross-links based on its lysine residues. XL7, 19, 48, 49, and 50 were not captured by the analyzed conformations. Interestingly, XL19, 48, 49, and 50 were measured at low frequency and were described by the simulation when considering all 45000 relaxed conformations of  $A_{\text{ext}}$  (Table S6). This highlights the low influence that ACP dynamics plays on the scattering curves. The cumulative weights of  $A_{\text{ext}}$  conformations matching the measured cross-links range between a minimum close to 0 (MBP and ACP based cross-links) and a maximum of 0.65 (XL39 across KS-AT<sub>2</sub> and KR). In contrast,  $A_{\text{arch}}$  satisfies 26 XLs involving mostly residues from MBP and ACP (Table S6). These XLs are of minor structural relevance due to the large conformational space sampled by the non-native MBP domains and the scarce role played by ACP on the BioEn results. In conclusion, model  $A_{\text{ext}}$  agrees with the experimental data overall better than  $A_{\text{arch}}$ .

**Note 7 – The BioEn intensities of  $B_{\text{ext}}$  match the experiment.** We computed  $R_g$  values from the BioEn scattering curve. Based on the Guinier approximation, the  $R_g$  of  $B_{\text{ext}}$  was equal to 72.6 Å and poorly agreed with the measured  $R_g$  of 76.6 Å (Table S3). The discrepancy between measured and simulated data is compatible with a fraction of aggregation in solution (Fig. S16). Analogously to construct *A*, an aggregate present in solution with  $R_g^{\text{sph}}$  of 150.8 Å at a fraction of 2.4% shift the  $R_g$  of  $B_{\text{ext}}$  to 78.1 Å. The *in silico* SAXS intensities of the extended model agree perfectly with the experiment (Fig. S16). These results reinforce the conclusion that M2 presents an extended conformation of the KS-AT dimer in solution.

**Note 8 – Flexibility of KR1, ACP1 and KR in  $B_{\text{ext}}$ .** KR1 presents an average distance from the reference of 30.7 Å (Fig. S17) that is analogous to the one observed for MBP (39.0 Å). Both domains are placed terminally in the biological constructs and their high degree of flexibility depends on the absence of a further N-terminal domain. Interestingly, ACP1 displays a lower average distance of 11.7 Å and contacts the KS-AT<sub>2</sub> domain in defined regions located in proximity of the DDI across both KS and AT (Fig. S17). The model is characterized by a lower flexibility compared to  $A_{\text{ext}}$ , with an average KR distance of 10.7 Å (Fig. S16). The C-terminal TE of  $B_{\text{ext}}$  is larger compared to the DD of  $A_{\text{ext}}$  and act as a structural constraint that limits KR mobility (Fig. S18).

**Note 9 – Differences in cross-links between holo- and apo-constructs.** XL-MS experiments were performed with construct *A* in apo- and holo-form, as well as with construct *B* in holo-form (Table S6 & 7). For construct *A*, we see different cross-linked peptide spectral matches (CSMs) between the apo and holo-protein, mainly comprising ACP in its docking to other domains. In holo-construct *A*, just 6 of overall 15 high frequency CSMs were found preserved (XL14-18 and XL21) and all medium frequency CSMs omitted. 4 new CSMs between MBP and KS were found in holo-construct *A*. The reproducibility of CSMs between the three experiments with apo-protein was good, so that the difference in cross-link patterns between apo- and holo-construct *A* seem significant. However, XL-MS has just been performed once for holo-construct *A*. For holo-construct *B*, a similar small number of CSMs was observed as for holo-construct *A*, however CSMs were often unique. Just 4 of overall 12 crosslinks, B-XL16, B-XL17, B-XL18, and B-XL27, were found in both constructs and matched with high frequency and high statistical weight by  $B_{\text{ext}}$  (Table S7). Just a few CSMs involving ACP were observed, similar as found for holo-construct *A*. XL-MS with holo-construct *B* features an interaction between AT and KR that has not been observed in constructs *A* (apo and holo), which may reflect a differently constrained KR, by either DD2 (construct *A*) or TE (construct *B*) (see Table S6). Overall, our data on construct *B*, i.e. the fewer CSMs with ACP, are supportive of phosphopantetheine constraining ACP docking. Further studies with phosphopantetheinylated vs. non-phosphopantetheinylated samples will be needed to understand the impact of phosphopantetheinylation on ACP docking.

**Note 10 –  $B_{\text{ext}}$  agrees with measured XL-MS data.** A total of 30 cross-links were measured across the different protein domains of construct *B*. We mapped the measured CSMs over the 5000 conformations that contributed to 99% of the BioEn cumulative weights. Compared to construct *A*, the number of CSMs measured for construct *B* exhibits lower reproducibility. Nevertheless, the  $B_{\text{ext}}$  model satisfies overall 23 XLs (Table S7). B-XL16, B-XL17, B-XL18, and B-XL27 were reproduced between experimental data of both constructs and matched with high frequency and high statistical weight by  $B_{\text{ext}}$  (Table S7). The outliers B-XL1, B-XL3, B-XL4 can be explained by the high mobility of the KR1 domain. The cross-links B-XL22, B-XL23, B-XL24, and B-XL25 measured across AT and KR2

were also not captured by the model. As for XL7, this can be explained by the attachment of the post-AT linker to the KS-AT core. The outliers might, however, be explained by measurement artifacts due to protein aggregation or reflect a higher mobility of the processing domain as a whole (KR2-ACP2-TE).

**Note 11 - XL-MS data can be transferred across constructs A and B.** To evaluate the transferability of the XL-MS data across different constructs, we mapped the highest ranked  $B_{\text{ext}}$  conformations (1000) on the XL-MS data measured for construct A. Interestingly,  $B_{\text{ext}}$  shows the same pattern of XL interactions documented for  $A_{\text{ext}}$  (Table S6). In particular, we report high frequencies of interaction across the post-AT linker and KR2 and interaction hot spots of ACP with both KS-AT and KR, XL7 remains as an outlier shared by both  $A_{\text{ext}}$  and  $B_{\text{ext}}$ . These results highlight that the same XL-MS data can be mapped onto different DEBS constructs. Such a strategy might help the structural investigation of additional DEBS modules in the future.

**Note 12 - Turnover analysis of phage display enriched mutants.** The bimodular DEBS-derived system LM+M1+M3-TE, used as a testbed in previous studies<sup>43-44</sup>, provides a suitable setting for studying the integrity of ACP1 and catalytic domain recognition by ACP1 (bimodular system built by LM(4), (5)M1(2), and (3)M3-TE; number in brackets denote docking domains used to mediate a weak non-covalent interaction). The sequence identity between the KSs of M2 and M3 is 58% on the protein level (EMBOSS pairwise assembly, [www.ebi.ac.uk](http://www.ebi.ac.uk))<sup>45</sup>, so that the ACP1-KS3 interaction, although involving a non-cognate interface, is likely preserved. Previous work demonstrated the catalytic activity of the LM+M1+M3-TE bimodular assembly line and support this assumption. Note that by replacing M2 with DEBS module 3 (M3), yielding LM+M1+M3-TE, the translocation from M1 to M3 is rate-limiting<sup>43-44</sup>, and the performance of the ACP1 mutant has direct impact on LM+M1<sub>mut</sub>-M3-TE turnover.

The phage display approach was performed to evolve the non-cognate ACP1:KS3 interface towards higher affinity, detectable by ELISA screening, thereby studying whether a dedicated sequence motif emerges in response to a single specific binding site at the KS. The turnover rate of the LM+M1+M3-TE assembly line, in which M1 is mutated in ACP1 according to phage display hits, can readout the fitness of the evolved ACP1s as well as the impact of mutations on ACP function (ACP1 mutations were cloned into the full-length M1 construct and the turnover monitored (LM+M1<sub>mut</sub>-M3-TE)).

**Note 13 - Analysis of Second Generation ACP1 Libraries.** Similar to the design of library 1, the positions at helix 1 chosen for randomization were not conserved across several ACP domains and located on the surface of the ACP. Using the same protocol established for biopanning of ACP1-Lib1, both libraries were purified and subjected to the biopanning protocol. The theoretical diversity for both libraries was  $6.40 \times 10^7$  PFU/mL and the practical diversity exceeded the theoretical diversity with  $9.72 \times 10^8$  PFU/mL (ACP1-Lib2) and  $3.02 \times 10^8$  PFU/mL (ACP1-Lib3) in both cases. In screening library 2 and 3 mutants (Lib2-Mut"X" and Lib3-Mut"X", respectively) to KS-AT binding by ELISA, we observed increased BSA background. All these ACP1 variants were still enzymatically active, thus overall intact (Fig. S20E). For the additional evaluation of putative hits, we performed an ELISA titration experiment (Fig. S20F). This data was collected with phages purified out of a 45 mL culture using described protocols<sup>1</sup>. Working with purified phages at different conditions allowed a better judgment of affinity than ACP1 wild-type. Just those mutants are included in sequence analysis, which showed higher affinity than ACP1 wild-type (Fig. S20G). Similar to hits from ACP1-Lib1, no consensus sequence was observed among the enriched mutants.

## Supporting Figures

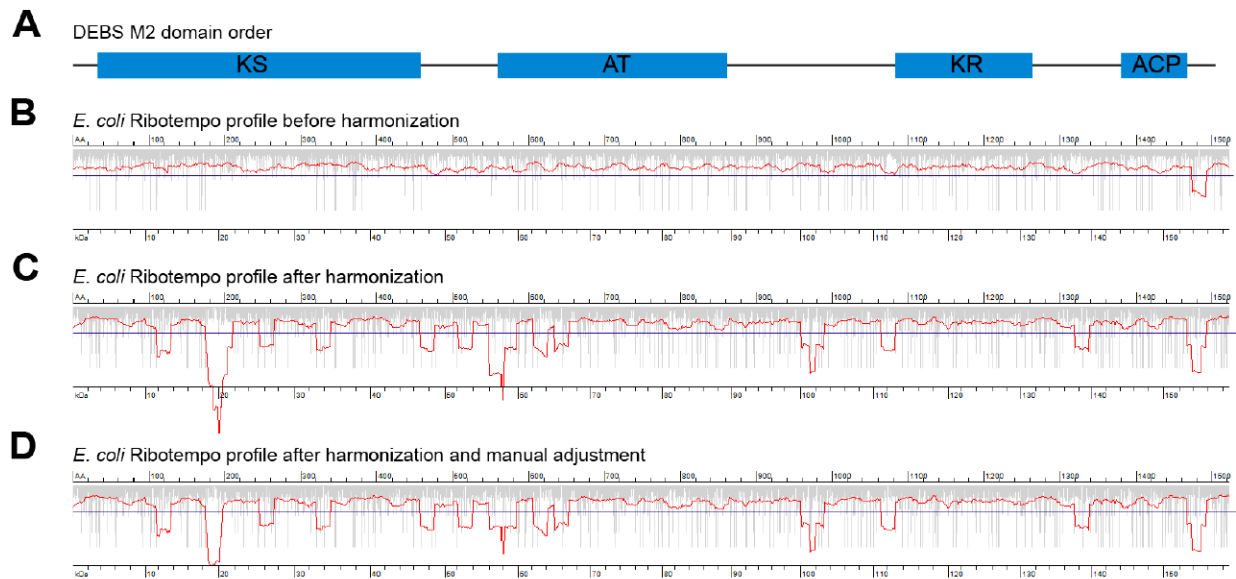

**Figure S1. The effect of codon harmonization on the predicted translation rates of M2.** (A) M2 domain architecture. Prediction of the translation rate in *E. coli* before harmonization (B), after harmonization (C), and after manual adjustment of the harmonized sequence (D). Translation rates were predicted using the Ribotempo tool <sup>46</sup>. For gene sequences of original and harmonized gene, see Table S2.

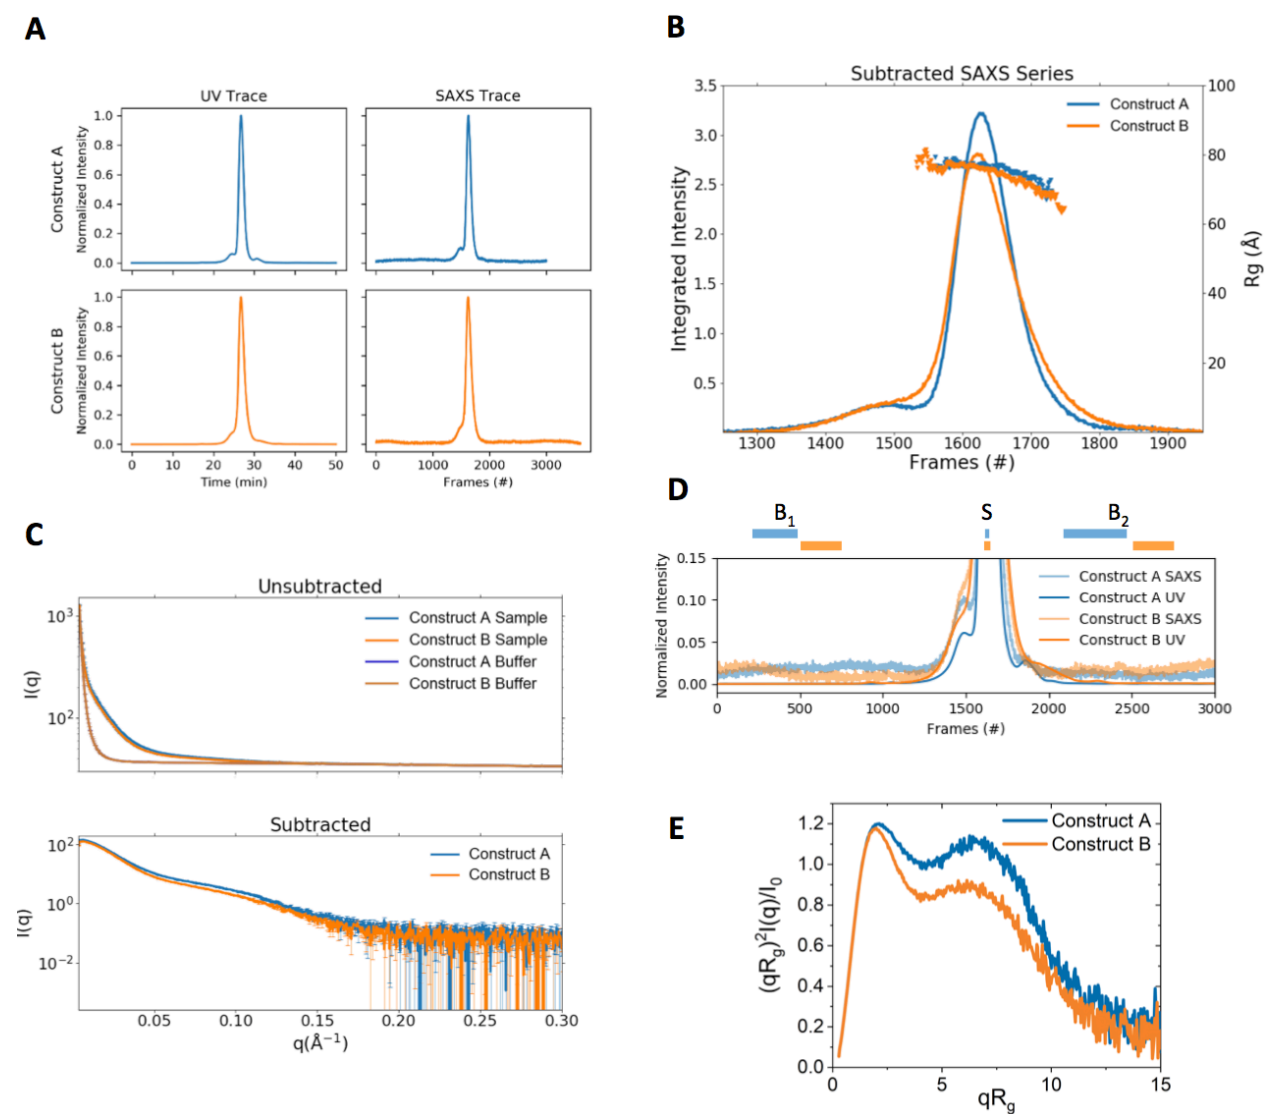

**Figure S2: SEC-SAXS Analysis of Constructs A and B.** (A) Normalized UV and SAXS traces of constructs A (blue) and B (orange). SAXS traces are integrated over the full  $q$ -range. (B) Subtracted SAXS trace of the peak region. An aggregate-shoulder fronts the main peaks of both constructs.  $R_g$  estimates are mostly frame-independent at the peak center, but rise and fall at the left and right edges, respectively. (C) Averaged scattering profiles of the frames selected as buffer and sample (top), and the subtracted intensities (bottom). Error bars indicate experimental errors (standard deviation). (D) Aligned overlay of the SAXS and UV traces, highlighting additional peaks of low intensity only visible in the UV trace. The UV trace was shifted to account for the detector-detector distance within the FPLC system. Colored bars indicate regions averaged for the analysis. B<sub>1</sub>, buffer region 1; S, sample region; B<sub>2</sub>, buffer region 2 (E) Normalized Kratky-plots of the constructs.



**A**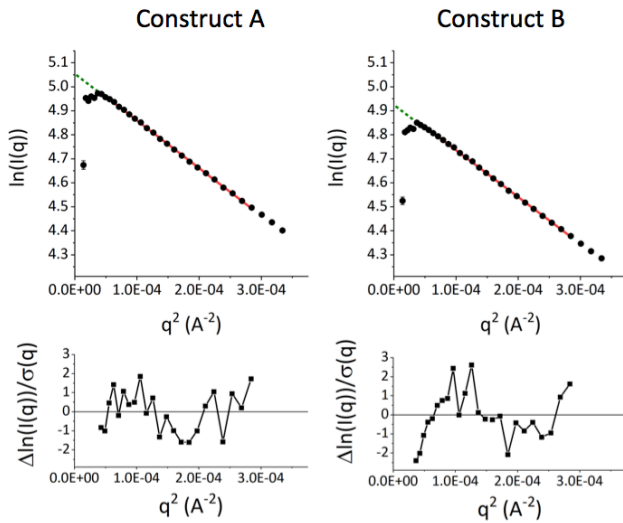**B**

|                       | A              | B              | Method      |
|-----------------------|----------------|----------------|-------------|
| $D_{\max} (\text{Å})$ | $268 \pm 4$    | $278 \pm 5$    |             |
| $R_g (\text{Å})$      | $80.2 \pm 0.1$ | $79.1 \pm 0.1$ | BIFT        |
| $I_0$                 | $160.0 \pm 1$  | $140 \pm 1$    |             |
| <hr/>                 |                |                |             |
| $D_{\max} (\text{Å})$ | 283            | 286            |             |
| $R_g (\text{Å})$      | $80.7 \pm 0.1$ | $79.3 \pm 0.2$ | GNOM        |
| $I_0$                 | $159 \pm 1$    | $140 \pm 1$    |             |
| <hr/>                 |                |                |             |
| $R_g (\text{Å})$      | $77.2 \pm 0.2$ | $76.6 \pm 0.2$ | Guinier     |
| $I_0$                 | $157 \pm 1$    | $139 \pm 1$    |             |
| <hr/>                 |                |                |             |
| $M_w (\text{kDa})$    | 403            | 484            | Chem. Comp. |
| $M_w (\text{kDa})$    | 408            | 488            | Vc          |
| $M_w (\text{kDa})$    | 494            | 558            | Vp          |

**C**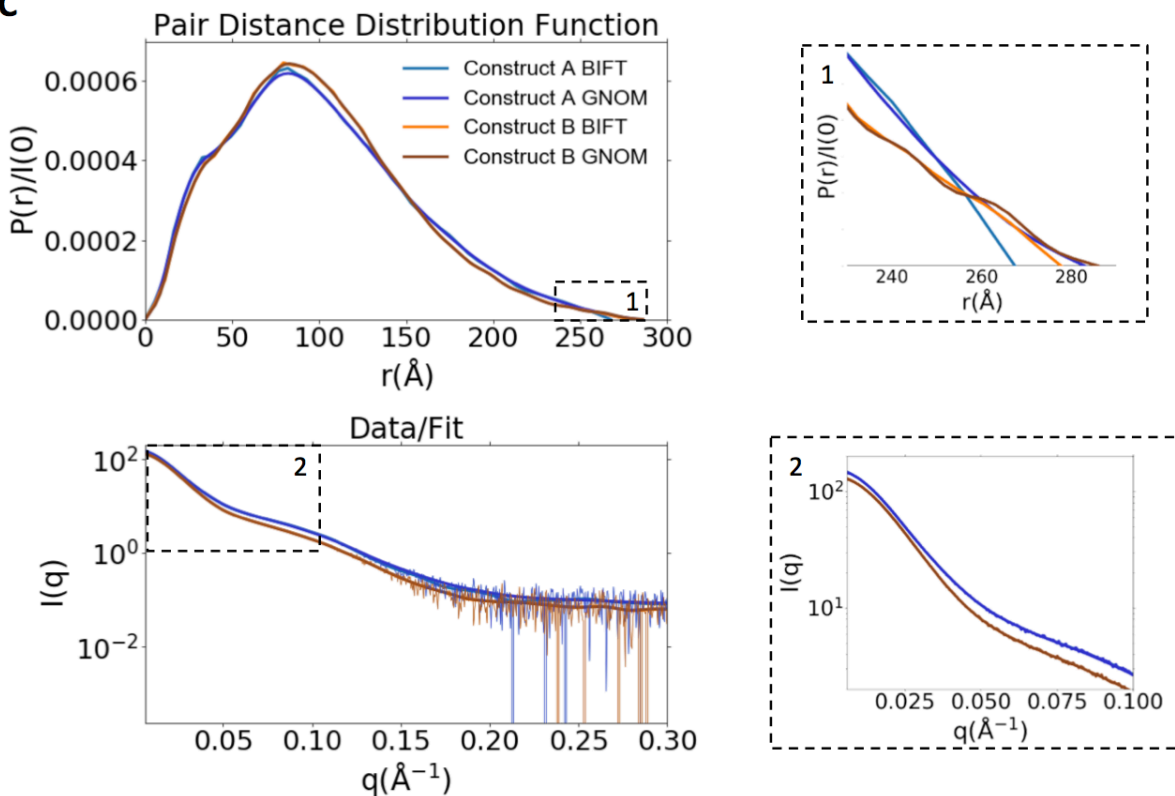

**Figure S3. Guinier Fits and Pair Distance Distributions** (A) Guinier plots of the subtracted sample averages. The fit is displayed in red with the  $I_0$  approximation as a green dashed line. The distribution of normalized residuals for the regressions are shown below. For construct *B*, the initial downward stretch of the residuals hints toward the presence of mild aggregation (B) Summary of the values extracted from the Guinier analysis and the  $P(r)$  function together with the corresponding  $M_w$  estimates. (C)  $P(r)$  functions of constructs *A* and *B*, determined both via BIFT and GNOM (top). The curves generated with BIFT show a steep descent at high  $r$ , whereas the GNOM solution for construct *A* shows an uneven decay (inset 1). All computed  $P(r)$  distributions fit the scattering data (bottom), especially in the Porod-region (inset 2).

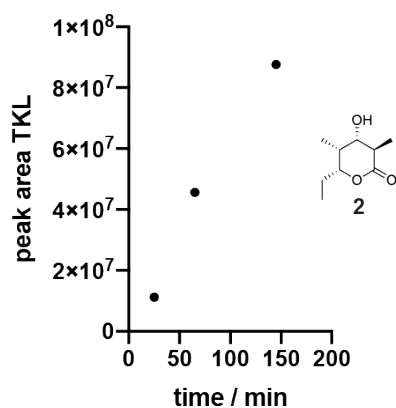

**Figure S4. Triketide lactone formation of construct *B* (KR1-ACP1-M2-TE).** The activity of construct *B* (in detail, the domains of the M2-TE part) was measured using 4  $\mu\text{M}$  of enzyme and saturating (non-rate-limiting) concentrations of (2*S*,3*R*)-2-methyl-3-hydroxy-diketide-SNAC, methylmalonyl-CoA and NADPH. In this assay, the diketide is directly loaded in the KS domain and then elongated with methylmalonyl. Three reactions were set up in parallel (same protein batch) and quenched at different time points (25, 65 and 145 min, respectively). A constant increase of triketide lactone **2** over a 145 min time course was confirmed by LC-MS. At time points 25, 65 and 145 min, an aliquot of the reaction solution was taken for determining turnover rates at estimated substrates saturating conditions, essentially following a protocol as described previously <sup>6</sup>. Turnover rates were determined to 0.32 min<sup>-1</sup>, 0.36 min<sup>-1</sup> and 0.35 min<sup>-1</sup> at 25, 65 and 145 min, respectively, which is about 10 % of the rates reported in by Li *et al* (ref. 6). A compromised turnover rate can be explained by the ACP1 interfering in substrate elongation. A similar effect of a second ACP interfering in turnover and comprising activity was reported before for murine FAS <sup>47</sup>. We note that construct *A* was not available for this assay, because of the missing TE domain.

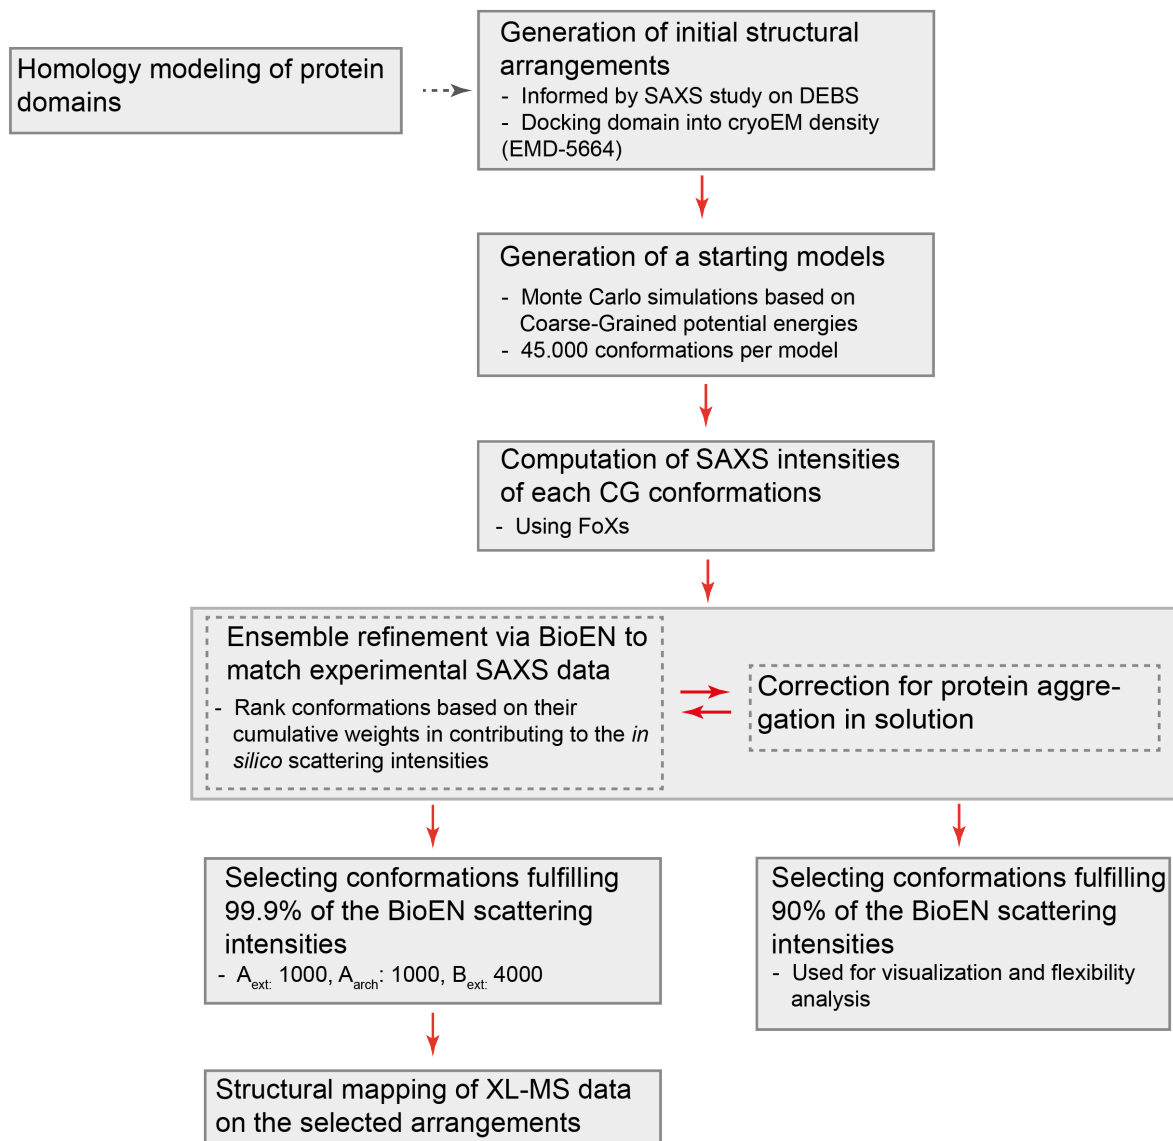

**Figure S5. Scheme of the modeling approach.** For details see Material & Methods.

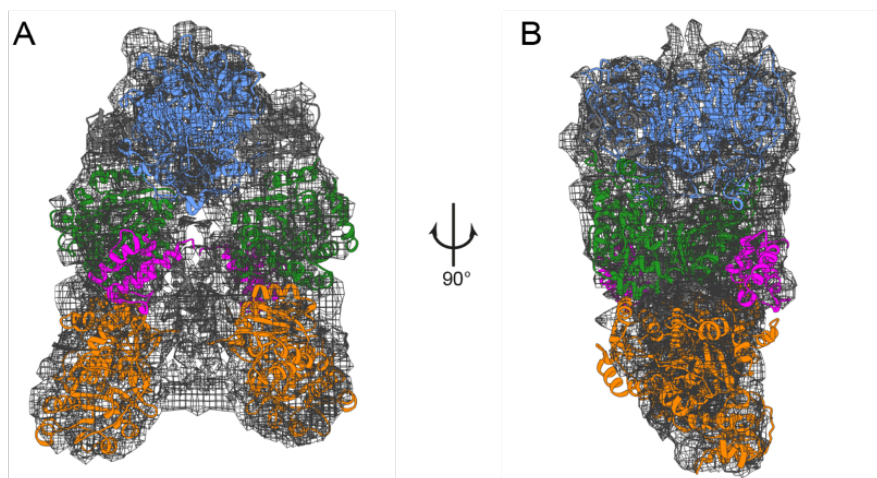

**Figure S6.  $A_{\text{arch}}$  fitted within of the PikAIII complex cryoEM density (EMD-5664).** Front (A) and lateral (B) views of the docked protein domains. Domain coloring: Density- light gray, KS- blue, LD- dark gray, AT- green, KR- orange, ACP- magenta, DD- dark gray.

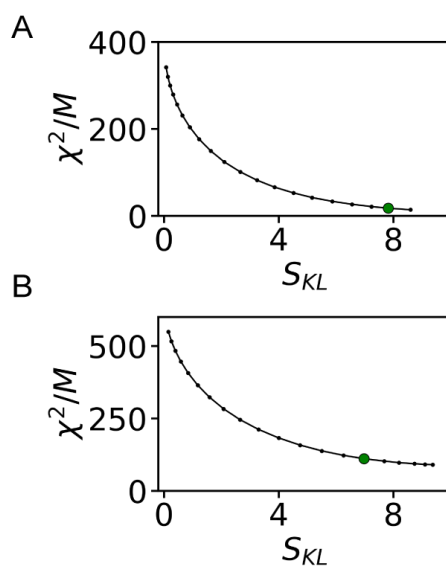

**Figure S7. L-curve analysis for the SAXS measurements.** Consistency between the simulated and experimental data (reduced chi-squared  $\chi^2$ ) plotted as a function of changes in weights based on relative entropy  $S_{KL}$  for  $A_{\text{ext}}$  (A) and  $A_{\text{arch}}$  (B). At  $\theta$  values of  $1.58 \cdot 10^4$  and  $3.98 \cdot 10^4$  for  $A_{\text{ext}}$  and  $A_{\text{arch}}$ , respectively, the  $S_{KL}$  and reduced  $\chi^2$  are equal to 7.8 and 17.6 for  $A_{\text{ext}}$  and 7.0 and 111.1 for  $A_{\text{arch}}$ , respectively (green dot).

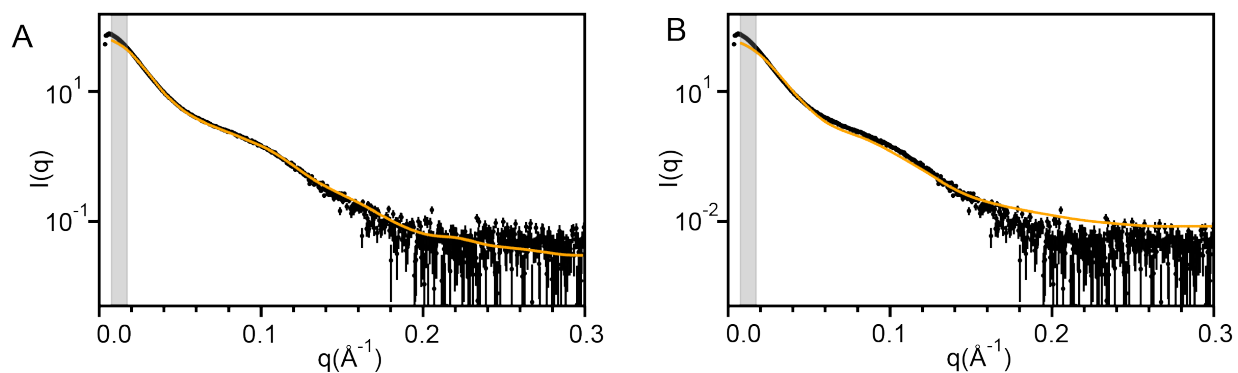

**Figure S8. BioEn ensemble refinement without protein aggregation.** Experimental (black) and BioEn (orange) scattering intensities for  $A_{\text{ext}}$  (A) and  $A_{\text{arch}}$  (B) as  $I(q)$  versus  $q$  obtained without accounting for protein aggregates. The Guinier region used to compute  $R_g$  is highlighted in gray.

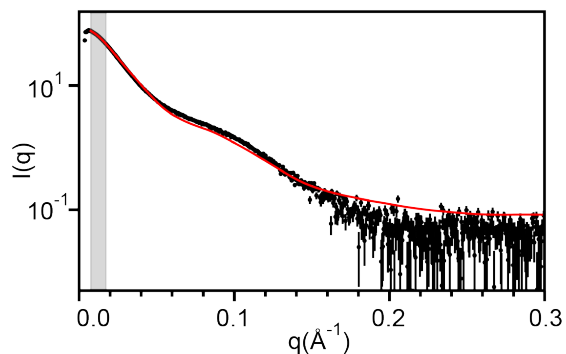

**Figure S9. A higher amount of protein aggregation improves the fit for  $A_{\text{arch}}$  in the Guinier region, but not beyond.** Fitting of the BioEn scattering curve as  $I(q)$  versus  $q$  of  $A_{\text{arch}}$  (red line) on the experimental data (black points) corrected for protein aggregation in solution equal to 10.1%. The Guinier region used to compute  $R_g$  is highlighted in gray.

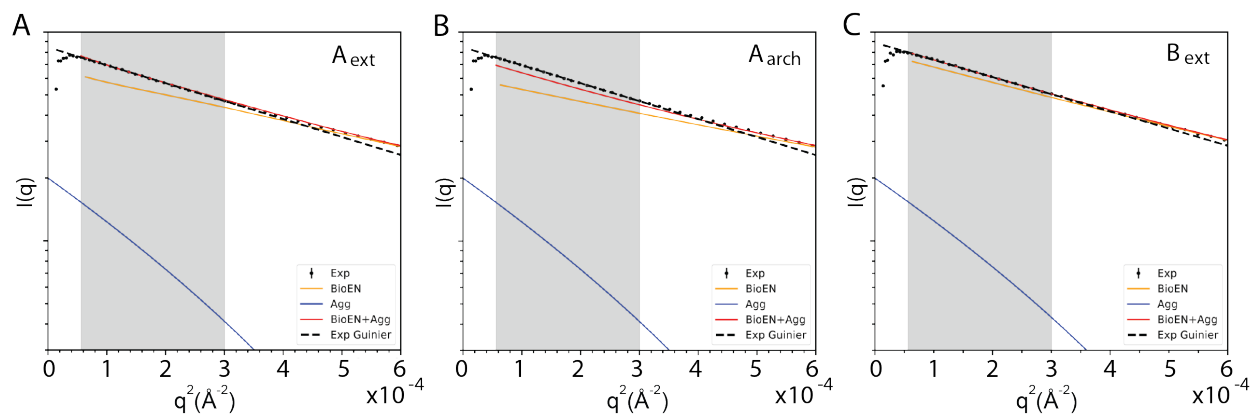

**Figure S10. The models with aggregate correction match the experimental intensities at the Guinier region.** Experimental (black points), simulated without aggregation (orange), aggregate (blue) and simulated in presence of aggregation (red curve) intensities at the Guinier region as  $\ln(I)$  vs  $q^2$  for  $A_{\text{ext}}$  (A),  $A_{\text{arch}}$  (B) and  $B_{\text{ext}}$  (C). The Guinier fittings for the experimental intensities of both constructs are shown as a black dashed line.

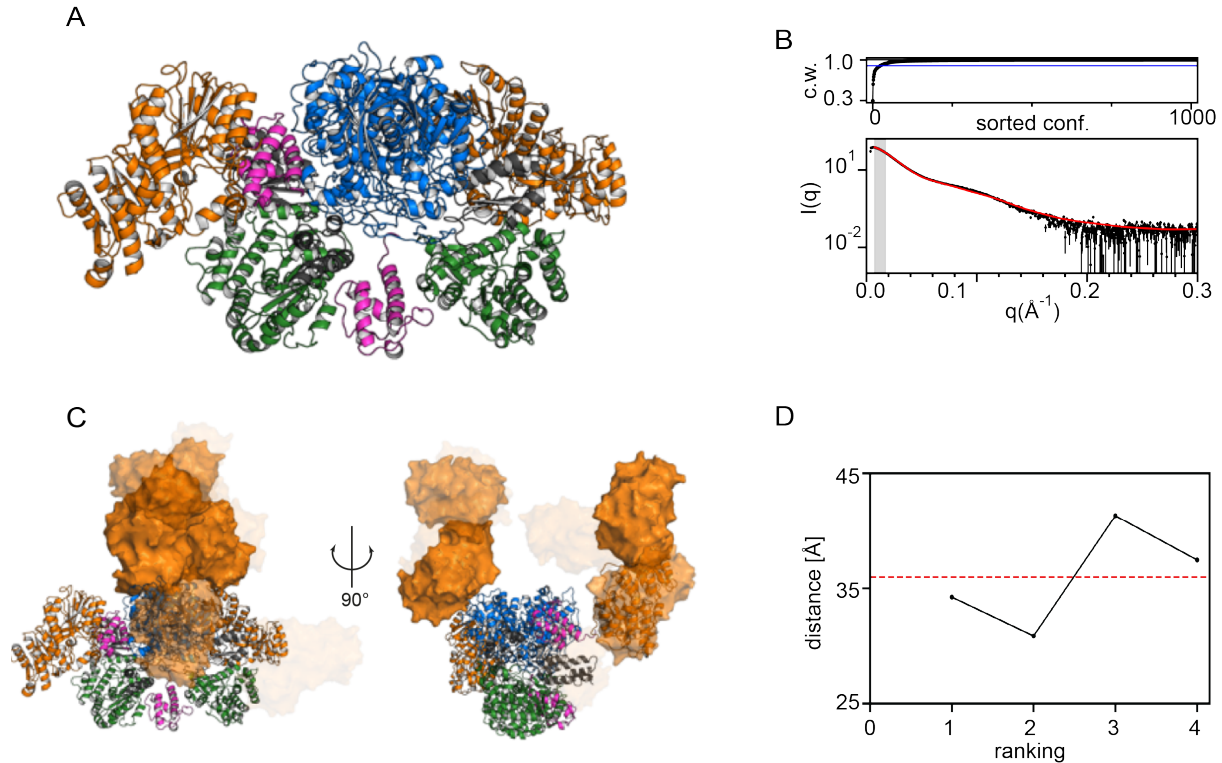

**Figure S11.  $A_{\text{arch}}^{598}$  disrupts the arched architecture.** (A) Conformation of  $A_{\text{arch}}^{598}$  ranked at highest statistical weight; (B) Cumulative weights (c. w.) of the weight-sorted conformations fulfilling 90% (blue line) and 100% (black line) of the fittings and computed (red) scattering intensities shown as  $I(q)$  versus  $q$  (bottom). The Guinier region used to compute  $R_g$  is highlighted in gray (a protein aggregation of 7.1 % is included). (C) Model conformations that explain 90% of the BioEn scattering curve. (D) KR distances (black points) across the 5 ranked conformations that explain 90% of the BioEn scattering curve. The average distance is equal to 36.0  $\text{\AA}$  (dashed red line). The conformation with highest statistical weight (ranked #0) was used as reference. Also see Note 1&2. Domain coloring: KS2- blue, LD- dark gray, AT- green, KR- orange, ACP- magenta, DD- dark gray.

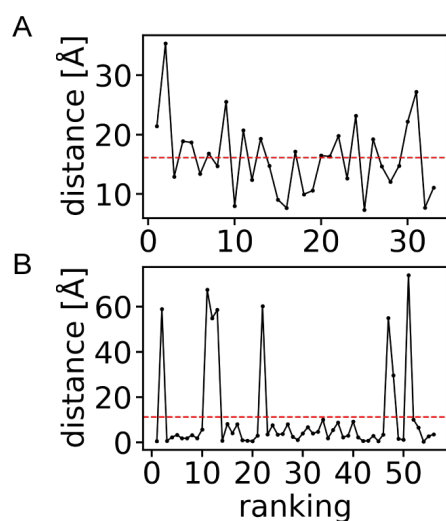

**Figure S12. KR flexibility of the conformations ranked at highest weight.** KR distances (black points) computed across the 33 and 56 conformations ranked at highest weight and explaining 90% of the fitting of  $A_{\text{ext}}$  (A) and  $A_{\text{arch}}$  (B), respectively. Average distances (dashed red line) are equal to 16.1 Å ( $A_{\text{ext}}$ ) and 11.2 Å ( $A_{\text{arch}}$ ). The average distance computed for  $A_{\text{arch}}$  drops to 3.9 Å when considering the 48 conformations that maintain the fully arched architecture and contribute together to the 71% of the fitting. The conformations with highest statistical weight (ranked #0) were used as reference.

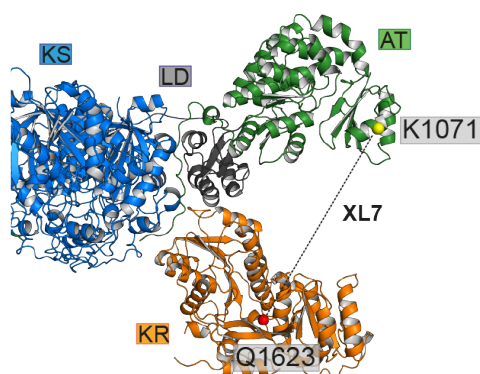

**Figure S13. Residues involved in XL7.**  $A_{\text{ext}}$  conformation at highest statistical weight. Depiction of the domains KS-AT<sub>2</sub> (blue and green, respectively) and KR (orange) with the residues in XL7 (AT<sub>K1071</sub> and KR<sub>Q1623</sub>) highlighted in yellow and red, respectively.



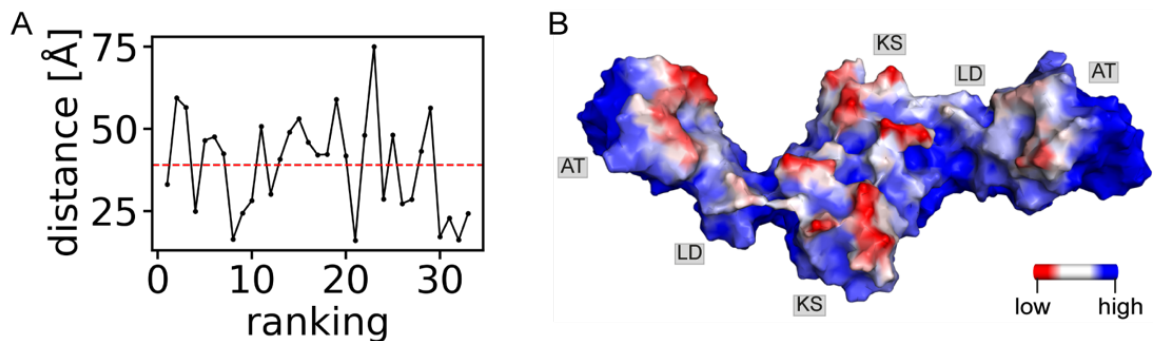

**Figure S14. MBP interaction with KS-AT<sub>2</sub>.** (A) Distances computed for MBP (black points) over the 33 conformations ranked at highest weight that explain 90% of the fitting of  $A_{\text{ext}}$ . Average distance (dashed red line) is equal to 39.0 Å. The conformation with highest statistical weight (ranked #0) was used as reference. (B) Depiction of the KS-AT<sub>2</sub> surface with MBP interaction hot spots highlighted. Frequencies of interactions range from low (blue), medium (white), and high frequencies (red).

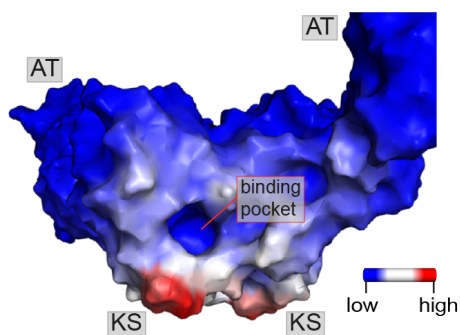

**Figure S15. ACP samples the entrance of the KS binding pocket.** Depiction of the KS-AT<sub>2</sub> surface in a lateral orientation. Spectrum of frequencies of interaction across ACP<sub>K1775</sub> and ACP<sub>K1784</sub> and the solvent exposed residues of KS-AT<sub>2</sub>. The frequencies range from low (blue), medium (white), and high (red) values.

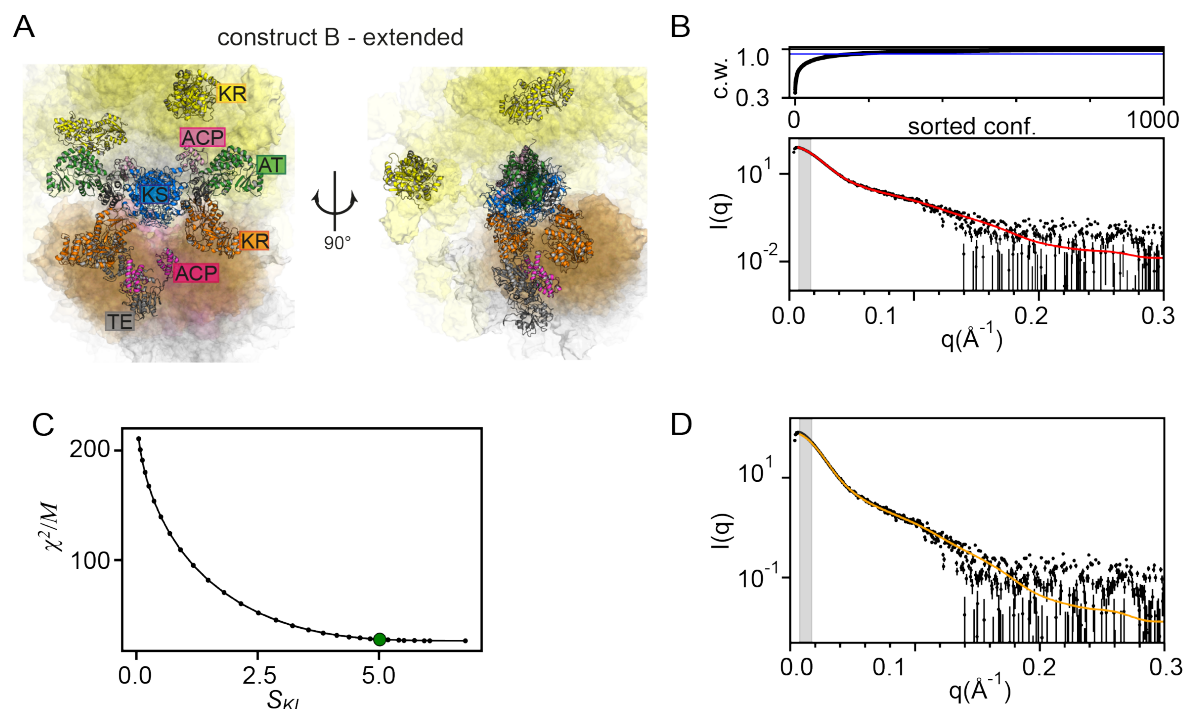

**Figure S16.  $B_{\text{ext}}$  agrees with SAXS experiment.** (A) Model conformations at higher statistical weight that explain the scattering fitting of  $B_{\text{ext}}$ . Domain coloring: KR1- yellow. ACP- light magenta. KS2- blue, AT2- green, KR2- orange, ACP2- magenta, TE- gray. (B) Cumulative weights (c. w.) of the weight-sorted conformations fulfilling 90% (blue line) and 100% (black line) of the fittings. (C) Experimental (black) and computed (red) scattering intensities as  $I(q)$  versus  $q$  that account for protein aggregation. (D) L-curve analysis for the SAXS measurements. Consistency between the simulated and experimental data (reduced chi-squared  $\chi^2$ ) plotted as a function of changes in weights based on relative entropy  $S_{KL}$  for  $B_{\text{ext}}$ . At  $\theta$  value of  $6.31 \cdot 10^3$  the  $S_{KL}$  and reduced  $\chi^2$  are equal to 5.0 and 27.7, respectively (green dot). (E) BioEn ensemble refinement without protein aggregation. Experimental (black) and BioEn (orange) scattering intensities for  $B_{\text{ext}}$  as  $I(q)$  versus  $q$  obtained without accounting for protein aggregates. The Guinier region used to compute  $R_g$  is highlighted in gray.

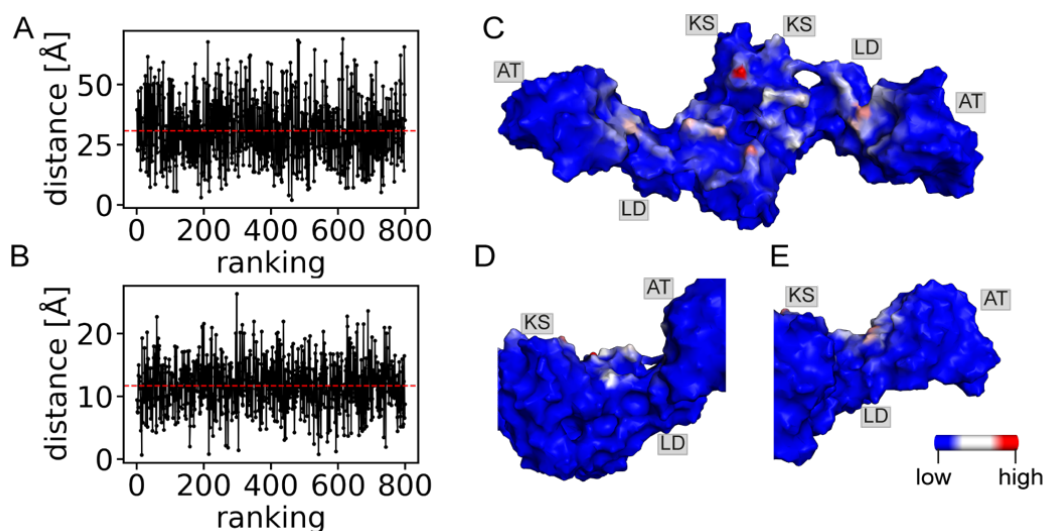

**Figure S17. The N-terminal KR1 and ACP1 have different mobility in  $B_{\text{ext}}$ .** Distances (black points) for KR1 (A) and ACP1 (B) computed over the 799 conformations ranked at highest weight that explain 90% of the fitting. Average distances (dashed red line) are equal to 30.7 and 11.7 Å for KR1 and ACP1, respectively. The conformations with highest statistical weight (ranked #0) were used as reference. (C) Depiction of the KS-AT<sub>2</sub> surface with ACP1 interaction hot spots highlighted. Frequencies of interactions monitored between KS and ACP1 (D) and between AT and ACP1 (E). Frequencies of interactions range from low (blue), medium (white), and high frequencies (red).

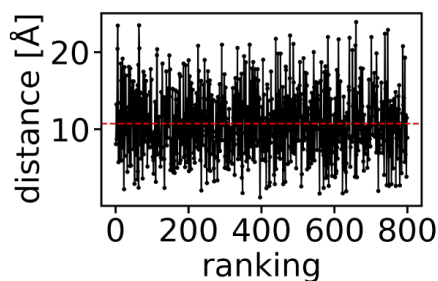

**Figure S18. KR2 flexibility of the conformations ranked at highest weight for  $B_{\text{ext}}$ .** Distances for KR2 (black points) computed across the 799 conformations ranked at highest weight and explaining 90% of the fitting of  $B_{\text{ext}}$ . The average distance (dashed red line) is equal to 10.7 Å.

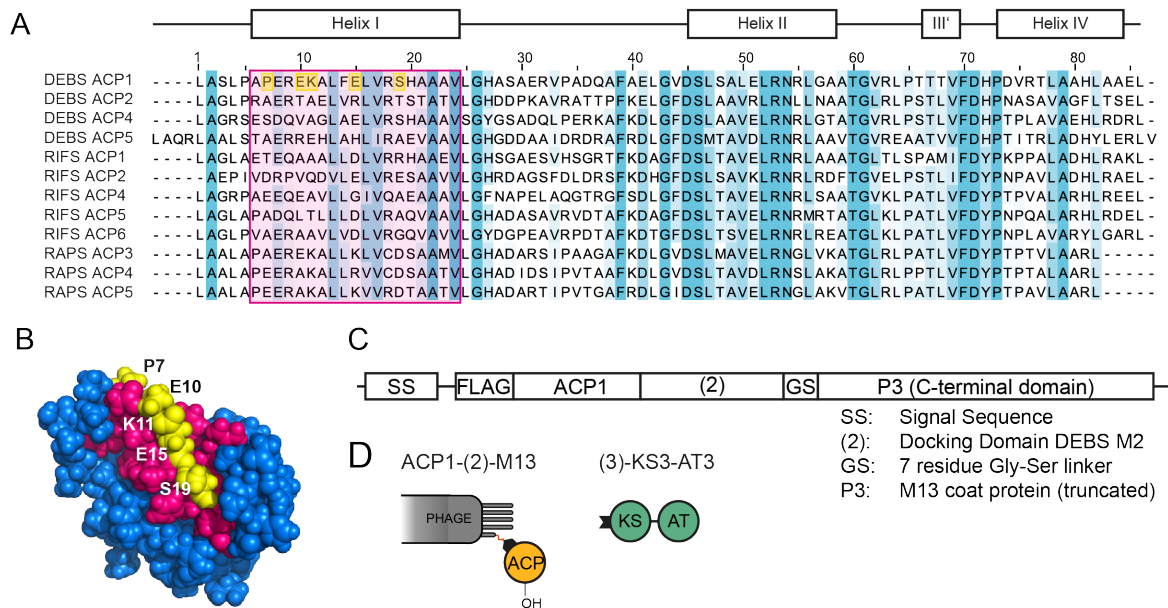

**Figure S19. Detailed phage display setup.** Design of the first ACP1-phagemid library. (A) Sequence alignment of ACPs. Helix I is highlighted in pink. position randomized for library generation are shown in yellow. Sequence identity highlighted in shades of blue. These residues were chosen as likely candidates to alter domain-domain interaction specificities, because they are located on the surface of ACP in the chain translocation epitope and are not conserved as suggested by the sequence alignment. (B) Homology model of ACP1. Surface residues selected for mutagenesis are highlighted. Color scheme as in (A). (C) Schematic representation of the phagemid architecture used for the library generation. Abbreviations as indicated. (D) Architecture of the ACP1 on phage and its target protein (3)KS3-AT3.

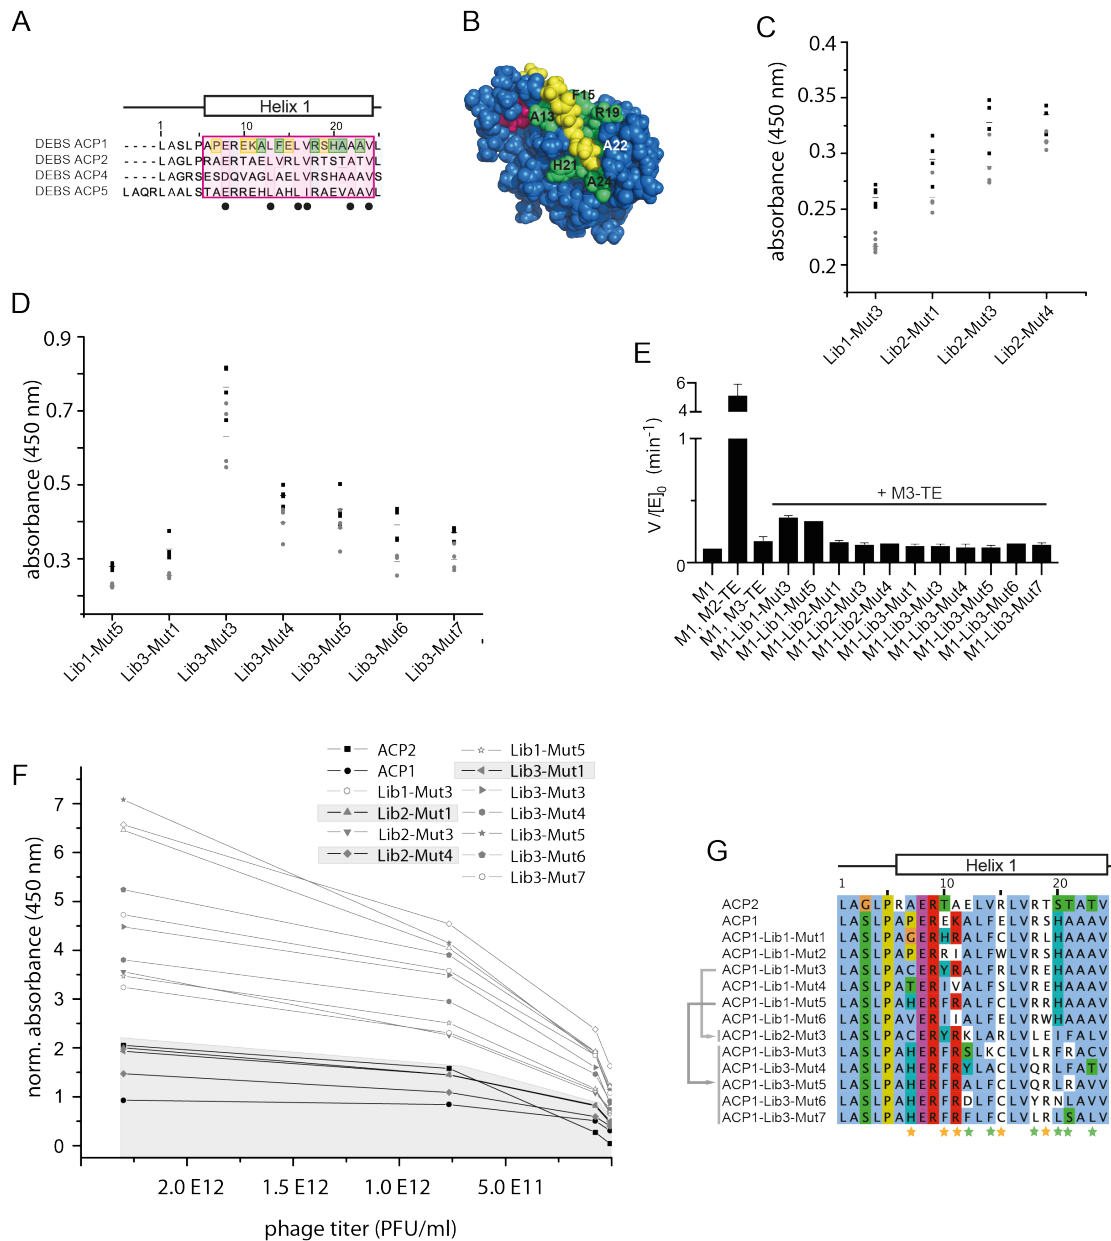

**Figure S20.** Design and analysis of two second generation ACP1 libraries. (A) Sequence alignment of ACPs highlighting positions selected for mutagenesis. Helix I in pink, position randomized for ACP1-Lib1 in yellow, and positions selected for a second round of directed evolution experiments are shown in green. Conserved positions are indicated with a dot (see alignment Fig. S17). (B) Homology model of ACP1. Surface residues selected for mutagenesis are highlighted. Color scheme as in (A). (C/D) ELISA of ACP1-Lib2 mutants (Lib2-Mut"X") compared to Lib1-Mut3 (C) and ACP1-Lib3 mutants (Lib3-Mut"X") compared to Lib1-Mut5 (D). Signal was obtained in (3)KS3-AT3 coated wells and the degree of unspecific binding was assessed by comparing it to the signal in BSA coated wells. For each ACP of Lib2-Mut"X" and Lib3-Mut"X", four individually grown phage cultures were tested, and the individual data points and data mean are indicated (eight data points and mean given for Lib1-Mut3 (C) and Lib1-Mut5 (D)). (E) Turnover rates of wild-type and chimeric bimodular PKSs comparing all ACP1 mutations. All bimodular PKS consisted of LM(4), (5)M1(2), and (3)Module"X"-TE. All initial rate data was obtained at individual PKS protein concentrations of 4  $\mu\text{M}$  and non-limiting concentrations of propionyl-CoA, methylmalonyl-CoA, and NADPH. Measurements were

performed in triplicate. Either wild-type M1 was used as the first module (M1), or one of the ACP1 mutants enriched in the directed evolution experiments (M1-Lib"X"-Mut"X"). (F) Titration ELISA of wild-type and mutant ACPs presented on the phage surface. Data mean as straight line scatter from two individual plates coated with (3)KS3-AT3 are given (for data points, see Table S8). The ELISA signal was normalized to the amount of applied phage based on OD268 measurement (G) Sequence alignment of obtained mutants compared to wild-type ACP1 and ACP2. Randomized positions are indicated with a yellow (ACP1-Lib1) or green (ACP1-Lib2/3) asterisk.

## Supporting Tables

**Table S1.** Alignment of construct *A* and *B* with DEBS M2 (Uniprot entry Q03131). Numbering of construct *A* and *B* as resulting from protein design. MBP domain for construct *A* and TE of construct *B* not shown.

|                    |                                                                        |      |  |
|--------------------|------------------------------------------------------------------------|------|--|
|                    | <b>→KR1</b>                                                            |      |  |
| construct_B        | -----MDEVSAALRYRIEWRPTGAGEPARLDGTWLVAKYAGTADETSAAAREA                  | 47   |  |
| Q03131 ERYA1_SACER | WLEPKPVARRSTEVDEVSAALRYRIEWRPTGAGEPARLDGTWLVAKYAGTADETSAAAREA          | 1440 |  |
| construct_A        | -----                                                                  |      |  |
| construct_B        | LESAGARVRELVVDDARCGRDELAERLRSVGEVAGVLSLLAVDEAEPEEAPLALASLADTL          | 107  |  |
| Q03131 ERYA1_SACER | LESAGARVRELVVDDARCGRDELAERLRSVGEVAGVLSLLAVDEAEPEEAPLALASLADTL          | 1500 |  |
| construct_A        | -----                                                                  |      |  |
| construct_B        | SLVQAMVSAELGCPLWTVTESAVATGPFPERVNAAHGALWGVGRVIALENPAVWGGLVDV           | 167  |  |
| Q03131 ERYA1_SACER | SLVQAMVSAELGCPLWTVTESAVATGPFPERVNAAHGALWGVGRVIALENPAVWGGLVDV           | 1560 |  |
| construct_A        | -----                                                                  |      |  |
| construct_B        | PAGSVAELARHLAAVVSGGAGEDQLALRADGVYGRRWVRAAAPATDDEWKPTGTVLVTGG           | 227  |  |
| Q03131 ERYA1_SACER | PAGSVAELARHLAAVVSGGAGEDQLALRADGVYGRRWVRAAAPATDDEWKPTGTVLVTGG           | 1620 |  |
| construct_A        | -----                                                                  |      |  |
| construct_B        | TGGVGGQIARWLARRGAPHLVSRSGPDADGAGELVAELEALGARTTVAACDVTDRESV             | 287  |  |
| Q03131 ERYA1_SACER | TGGVGGQIARWLARRGAPHLVSRSGPDADGAGELVAELEALGARTTVAACDVTDRESV             | 1680 |  |
| construct_A        | -----                                                                  |      |  |
| construct_B        | RELLGGIGDDVPLSAVFHAAATLDDGTVDTLTGERIERASRAKVLGARNLHELDTRELDLT          | 347  |  |
| Q03131 ERYA1_SACER | RELLGGIGDDVPLSAVFHAAATLDDGTVDTLTGERIERASRAKVLGARNLHELDTRELDLT          | 1740 |  |
| construct_A        | -----                                                                  |      |  |
|                    | <b>KR1←</b>                                                            |      |  |
| construct_B        | AFVLFSSFASAFGAPGLGGYAPGNAYLDGLAQRRSDGLPATAVAWGTWAGSGMAEGPVA            | 407  |  |
| Q03131 ERYA1_SACER | AFVLFSSFASAFGAPGLGGYAPGNAYLDGLAQRRSDGLPATAVAWGTWAGSGMAEGAVA            | 1800 |  |
| construct_A        | -----                                                                  |      |  |
| construct_B        | DRFRRHGVIEMPPETACRALQNALDRAEVCPIVIDVRWDRFLLAYTAQRPTRLFDEIDDA           | 467  |  |
| Q03131 ERYA1_SACER | DRFRRHGVIEMPPETACRALQNALDRAEVCPIVIDVRWDRFLLAYTAQRPTRLFDEIDDA           | 1860 |  |
| construct_A        | -----                                                                  |      |  |
|                    | <b>→ACPI</b>                                                           |      |  |
| construct_B        | RRAAPQAAAAPRVGAHMLASLPAPERKALFELVRSAAAALGHASAERVPAQAFDELG              | 527  |  |
| Q03131 ERYA1_SACER | RRAAPQAPAEPRVGA--LASLPAPEREEALFELVRSAAAALGHASAERVPAQAFDELG             | 1918 |  |
| construct_A        | -----                                                                  |      |  |
|                    | <b>ACPI←</b>                                                           |      |  |
| construct_B        | VDSLALRNLGAAATGVRLEPTTTFVDFHPDVRTLAAHLAELGGATGAEQAAPATTAPV             | 587  |  |
| Q03131 ERYA1_SACER | VDSLALRNLGAAATGVRLEPTTTFVDFHPDVRTLAAHLAELGGATGAEQAAPATTAPV             | 1978 |  |
| construct_A        | ----- (MBP not shown) AAPATTAPV                                        | 400  |  |
|                    | <b>→KS2</b>                                                            |      |  |
| construct_B        | DEPIAIVGMACRLPGEVDSPERLWELITSGRDSAAEVPDDRQWVPDELMASDAAGTRRAH           | 647  |  |
| Q03131 ERYA1_SACER | DEPIAIVGMACRLPGEVDSPERLWELITSGRDSAAEVPDDRQWVPDELMASDAAGT-RAH           | 2037 |  |
| construct_A        | DEPIAIVGMACRLPGEVDSPERLWELITSGRDSAAEVPDDRQWVPDELMASDAAGTRRAH<br>*****  | 460  |  |
| construct_B        | GNFMAGAGDFDAAFFGISPREALAMPQQRQALETWEALESAGIPPETLRGSDTGVFVG             | 707  |  |
| Q03131 ERYA1_SACER | GNFMAGAGDFDAAFFGISPREALAMPQQRQALETWEALESAGIPPETLRGSDTGVFVG             | 2097 |  |
| construct_A        | GNFMAGAGDFDAAFFGISPREALAMPQQRQALETWEALESAGIPPETLRGSDTGVFVG<br>*****    | 520  |  |
| construct_B        | MSHQGYATGRPRPEDGVDGYLLTGNTASVASGRIAYVLGLEGPALTVDTACSSSLVALHT           | 767  |  |
| Q03131 ERYA1_SACER | MSHQGYATGRPRPEDGVDGYLLTGNTASVASGRIAYVLGLEGPALTVDTACSSSLVALHT           | 2157 |  |
| construct_A        | MSHQGYATGRPRPEDGVDGYLLTGNTASVASGRIAYVLGLEGPALTVDTACSSSLVALHT<br>*****  | 580  |  |
| construct_B        | ACGSLRDGDCGLAVAGGVSVMAGPEVTFEFSRQGALS PDGRCKPFSDEADGFGLGEGSAF          | 827  |  |
| Q03131 ERYA1_SACER | ACGSLRDGDCGLAVAGGVSVMAGPEVTFEFSRQGALS PDGRCKPFSDEADGFGLGEGSAF          | 2217 |  |
| construct_A        | ACGSLRDGDCGLAVAGGVSVMAGPEVTFEFSRQGALS PDGRCKPFSDEADGFGLGEGSAF<br>***** | 640  |  |
| construct_B        | VVLQRLSDARREGRRLVGVVAGSAVNQDGASNGLSAPSGVAQQRVIRRAWARAGITGADV           | 887  |  |
| Q03131 ERYA1_SACER | VVLQRLSDARREGRRLVGVVAGSAVNQDGASNGLSAPSGVAQQRVIRRAWARAGITGADV           | 2277 |  |

|                    |                                                                        |      |
|--------------------|------------------------------------------------------------------------|------|
| construct_A        | VVLQRLSARREGRRVLGVVAGSAVNQDASNGLSAPSGVAQQRVIRRAWARAGITGADV<br>*****    | 700  |
| construct_B        | AVVEAHGTGTRLGDPVEASALLATYGKSRGSSGPVLLGSVKSNIHAQAAAGVAGVIKVL            | 947  |
| Q03131 ERYA1_SACER | AVVEAHGTGTRLGDPVEASALLATYGKSRGSSGPVLLGSVKSNIHAQAAAGVAGVIKVL            | 2337 |
| construct_A        | AVVEAHGTGTRLGDPVEASALLATYGKSRGSSGPVLLGSVKSNIHAQAAAGVAGVIKVL<br>*****   | 760  |
| construct_B        | LGLERGVVPPMLCRGERSGLIDWSSGEIELADGVREWSAADGVRRAGVSAFGVSGTNAH            | 1007 |
| Q03131 ERYA1_SACER | LGLERGVVPPMLCRGERSGLIDWSSGEIELADGVREWSAADGVRRAGVSAFGVSGTNAH            | 2397 |
| construct_A        | LGLERGVVPPMLCRGERSGLIDWSSGEIELADGVREWSAADGVRRAGVSAFGVSGTNAH<br>*****   | 820  |
|                    | <b>KS2 ← LD2 (linker domain)</b>                                       |      |
| construct_B        | VIIAEPPEPEVPVQPRRMLPATGVVPPVLSARTGAALRAQAGRLADHLLAAHPGIAPADVS          | 1067 |
| Q03131 ERYA1_SACER | VIIAEPPEPEVPVQPRRMLPATGVVPPVLSARTGAALRAQAGRLADHLLAAHPGIAPADVS          | 2457 |
| construct_A        | VIIAEPPEPEVPVQPRRMLPATGVVPPVLSARTGAALRAQAGRLADHLLAAHPGIAPADVS<br>***** | 880  |
|                    | <b>LD2 (linker domain) ← AT2</b>                                       |      |
| construct_B        | WTMARARQHFEERAAVLAADTAEAVHRLRAVADGAVVPGVVTGSASDGGSVFVFPQGGAQ           | 1127 |
| Q03131 ERYA1_SACER | WTMARARQHFEERAAVLAADTAEAVHRLRAVADGAVVPGVVTGSASDGGSVFVFPQGGAQ           | 2517 |
| construct_A        | WTMARARQHFEERAAVLAADTAEAVHRLRAVADGAVVPGVVTGSASDGGSVFVFPQGGAQ<br>*****  | 940  |
| construct_B        | WEGMARELLPVVFAESIAECDAVLSEVAGFSVSEVLEPRPDAPSLERVDVVQPVLFVAVM           | 1187 |
| Q03131 ERYA1_SACER | WEGMARELLPVVFAESIAECDAVLSEVAGFSVSEVLEPRPDAPSLERVDVVQPVLFVAVM           | 2577 |
| construct_A        | WEGMARELLPVVFAESIAECDAVLSEVAGFSVSEVLEPRPDAPSLERVDVVQPVLFVAVM<br>*****  | 1000 |
| construct_B        | VSLARLWRACGAVPSAVIGHSQGEIAAAVVAGALSLEDGMRVARRSRAVRAVAGRGSM             | 1247 |
| Q03131 ERYA1_SACER | VSLARLWRACGAVPSAVIGHSQGEIAAAVVAGALSLEDGMRVARRSRAVRAVAGRGSM             | 2637 |
| construct_A        | VSLARLWRACGAVPSAVIGHSQGEIAAAVVAGALSLEDGMRVARRSRAVRAVAGRGSM<br>*****    | 1060 |
| construct_B        | SVRGGRSVVEKLLADDSWTGRLEVAAVNGPDAVVVAGDAQAAREFLEYCEGVIRARAIP            | 1307 |
| Q03131 ERYA1_SACER | SVRGGRSVVEKLLADDSWTGRLEVAAVNGPDAVVVAGDAQAAREFLEYCEGVIRARAIP            | 2697 |
| construct_A        | SVRGGRSVVEKLLADDSWTGRLEVAAVNGPDAVVVAGDAQAAREFLEYCEGVIRARAIP<br>*****   | 1120 |
| construct_B        | VDYASHTAHVEFVRDELVQALAGITPRRAEVFFFSTLTGDFLDGTELDAGYWRNLRHPV            | 1367 |
| Q03131 ERYA1_SACER | VDYASHTAHVEFVRDELVQALAGITPRRAEVFFFSTLTGDFLDGTELDAGYWRNLRHPV            | 2757 |
| construct_A        | VDYASHTAHVEFVRDELVQALAGITPRRAEVFFFSTLTGDFLDGTELDAGYWRNLRHPV<br>*****   | 1180 |
| construct_B        | EFHSAVQALTDQGYATFIEVSPHPVLASSVQETLDDAESDAAVLGTLERDAGDADRFLTA           | 1427 |
| Q03131 ERYA1_SACER | EFHSAVQALTDQGYATFIEVSPHPVLASSVQETLDDAESDAAVLGTLERDAGDADRFLTA           | 2817 |
| construct_A        | EFHSAVQALTDQGYATFIEVSPHPVLASSVQETLDDAESDAAVLGTLERDAGDADRFLTA<br>*****  | 1240 |
|                    | <b>AT2 ← → KR2</b>                                                     |      |
| construct_B        | LADAHTRGVAVDWEAVLGRAGLVLDLPGYPFQGKRFWLLPDRTTPRDELGDWGYRVDWTEV          | 1487 |
| Q03131 ERYA1_SACER | LADAHTRGVAVDWEAVLGRAGLVLDLPGYPFQGKRFWLLPDRTTPRDELGDWGYRVDWTEV          | 2877 |
| construct_A        | LADAHTRGVAVDWEAVLGRAGLVLDLPGYPFQGKRFWLLPDRTTPRDELGDWGYRVDWTEV<br>***** | 1300 |
| construct_B        | PRSEPAALRGRWLVVVEGHEEDGWTEVRSALAEAGAEPEVTRGVGGLVGDACAGVVSLL            | 1547 |
| Q03131 ERYA1_SACER | PRSEPAALRGRWLVVVEGHEEDGWTEVRSALAEAGAEPEVTRGVGGLVGDACAGVVSLL            | 2937 |
| construct_A        | PRSEPAALRGRWLVVVEGHEEDGWTEVRSALAEAGAEPEVTRGVGGLVGDACAGVVSLL<br>*****   | 1360 |
| construct_B        | ALEGDGAVQTLVLVRELDAGEIDAPLWTVTFGAVDAGSPVARPDQAKLWGLGQVASLERG           | 1607 |
| Q03131 ERYA1_SACER | ALEGDGAVQTLVLVRELDAGEIDAPLWTVTFGAVDAGSPVARPDQAKLWGLGQVASLERG           | 2997 |
| construct_A        | ALEGDGAVQTLVLVRELDAGEIDAPLWTVTFGAVDAGSPVARPDQAKLWGLGQVASLERG<br>*****  | 1420 |
| construct_B        | PRWTGLVDLPHMPDPELRGRLTAVLAGSEDQVAVRADAVRARRLSPAHTATSEYAVPGG            | 1667 |
| Q03131 ERYA1_SACER | PRWTGLVDLPHMPDPELRGRLTAVLAGSEDQVAVRADAVRARRLSPAHTATSEYAVPGG            | 3057 |
| construct_A        | PRWTGLVDLPHMPDPELRGRLTAVLAGSEDQVAVRADAVRARRLSPAHTATSEYAVPGG<br>*****   | 1480 |
| construct_B        | TILVTGGTAGLGAEVARNLAGRGAEHLALVSRGPDTEGVGDLTAELTRLGARVSVHACD            | 1727 |
| Q03131 ERYA1_SACER | TILVTGGTAGLGAEVARNLAGRGAEHLALVSRGPDTEGVGDLTAELTRLGARVSVHACD            | 3117 |
| construct_A        | TILVTGGTAGLGAEVARNLAGRGAEHLALVSRGPDTEGVGDLTAELTRLGARVSVHACD<br>*****   | 1540 |
| construct_B        | VSSREPVRELVHGLIEQGDVVRGVVHAAGLPQQVAINDMDEAAFDEVVAAGGAVHLDE             | 1787 |
| Q03131 ERYA1_SACER | VSSREPVRELVHGLIEQGDVVRGVVHAAGLPQQVAINDMDEAAFDEVVAAGGAVHLDE             | 3177 |
| construct_A        | VSSREPVRELVHGLIEQGDVVRGVVHAAGLPQQVAINDMDEAAFDEVVAAGGAVHLDE<br>*****    | 1600 |
| construct_B        | LCSDAELFLFSSGAGVWGSARQGAYAAAGNAFLDAFARHRRGRGLPATSVAWGLWAAGGM           | 1847 |
| Q03131 ERYA1_SACER | LCSDAELFLFSSGAGVWGSARQGAYAAAGNAFLDAFARHRRGRGLPATSVAWGLWAAGGM           | 3237 |
| construct_A        | LCSDAELFLFSSGAGVWGSARQGAYAAAGNAFLDAFARHRRGRGLPATSVAWGLWAAGGM<br>*****  | 1660 |



```

*****
construct_B      TGDEEAVSFLRERGVRRAMPVPRALAALDRVLASGETAVVVTDVDWPAFAESYTAARPRPL 1907
Q03131|ERYA1_SACER TGDEEAVSFLRERGVRRAMPVPRALAALDRVLASGETAVVVTDVDWPAFAESYTAARPRPL 3297
construct_A      TGDEEAVSFLRERGVRRAMPVPRALAALDRVLASGETAVVVTDVDWPAFAESYTAARPRPL 1720
*****
                KR2←                →ACP2
construct_B      LDRIVTTAPSERAGEPETESLRDRLAGLPRAERTAELVRLVRTSTATVLGHDDPKAVRAT 1967
Q03131|ERYA1_SACER LDRIVTTAPSERAGEPETESLRDRLAGLPRAERTAELVRLVRTSTATVLGHDDPKAVRAT 3357
construct_A      LDRIVTTAPSERAGEPETESLRDRLAGLPRAERTAELVRLVRTSTATVLGHDDPKAVRAT 1780
*****
                ACP2←→DD2
construct_B      TPFKELGFDSLAAVRLRNLLNAATGLRPLSTLVFDHPNASAVAGFLDAELSGTPAREASS 2027
Q03131|ERYA1_SACER TPFKELGFDSLAAVRLRNLLNAATGLRPLSTLVFDHPNASAVAGFLDAELGTEVRGEAPS 3417
construct_A      TPFKELGFDSLAAVRLRNLLNAATGLRPLSTLVFDHPNASAVAGFLDAELGTEVRGEAPS 1840
*****
                DD2←
construct_B      AL (TE6 not shown)----- 2029
Q03131|ERYA1_SACER ALAGLDALEGALPEVPATEREELVQRLEERMLAALRPVAQAADASGTGANPSGDDLGEAGV 3477
construct_A      ALAGLDALEAALPEVPATEREELVQRLEERMLAALRPVAQAADASGTGANPSGDDLGEAGV 1900
**

construct_B      -----
Q03131|ERYA1_SACER DELLEALGRELDGD 3491
construct_A      DELLEALGRELDGD 1914

```

**Table S2. Gene sequence of M2 before and after harmonization**

| Construct                 | DNA sequence                                                                                                                                                                                                                                                                                                                                                                                                                                                                                                                                                                                                                                                                                                                                                                                                                                                                                                                                                                                                                                                                                                                                                                                                                                                                                                                                                                                                                                                                                                                                                                                                                                                                                                                                                                                                                                                                                                                                                                                                                                                                                                                                                                                                                                                                                                                                                                                                                                                                                                                                                                                                                                                                                                                                                                                                                                                                                                                                                                                                                                                                                                                                                                                                                                                                                                                                                                                                                                                                                                                                                                                                                                                                                                                                                                                                                                                                                                                                                                                                                                                                                                                                                                                                                                                                                                                                                                                                                                                                                                                                                          |
|---------------------------|-----------------------------------------------------------------------------------------------------------------------------------------------------------------------------------------------------------------------------------------------------------------------------------------------------------------------------------------------------------------------------------------------------------------------------------------------------------------------------------------------------------------------------------------------------------------------------------------------------------------------------------------------------------------------------------------------------------------------------------------------------------------------------------------------------------------------------------------------------------------------------------------------------------------------------------------------------------------------------------------------------------------------------------------------------------------------------------------------------------------------------------------------------------------------------------------------------------------------------------------------------------------------------------------------------------------------------------------------------------------------------------------------------------------------------------------------------------------------------------------------------------------------------------------------------------------------------------------------------------------------------------------------------------------------------------------------------------------------------------------------------------------------------------------------------------------------------------------------------------------------------------------------------------------------------------------------------------------------------------------------------------------------------------------------------------------------------------------------------------------------------------------------------------------------------------------------------------------------------------------------------------------------------------------------------------------------------------------------------------------------------------------------------------------------------------------------------------------------------------------------------------------------------------------------------------------------------------------------------------------------------------------------------------------------------------------------------------------------------------------------------------------------------------------------------------------------------------------------------------------------------------------------------------------------------------------------------------------------------------------------------------------------------------------------------------------------------------------------------------------------------------------------------------------------------------------------------------------------------------------------------------------------------------------------------------------------------------------------------------------------------------------------------------------------------------------------------------------------------------------------------------------------------------------------------------------------------------------------------------------------------------------------------------------------------------------------------------------------------------------------------------------------------------------------------------------------------------------------------------------------------------------------------------------------------------------------------------------------------------------------------------------------------------------------------------------------------------------------------------------------------------------------------------------------------------------------------------------------------------------------------------------------------------------------------------------------------------------------------------------------------------------------------------------------------------------------------------------------------------------------------------------------------------------------------------------------|
| M2<br><i>S. erythraea</i> | <p>GAGCCGATCGCGATCGTCGGCATGGCGTGCCGGCTGCCCGGGAGGTCGACTCCCCGGAGCGGCTGTGGGAGCTGATCACCTCGGGA<br/> CGCGACTCCGCGGGGAGGTCCTCCGATGACCGGGGCTGGTCCCCGACGAGCTGATGGCCTCCGACGCGCGGGAAACCCGCGCGCC<br/> CACGGCAACTTCATGGCGGGCGCCGGTACTTCGACGCGCGCTTCTTCGGGATCTCGCCGCGGAGGCGCTGGCGATGGACCCCGCAG<br/> CAGCGCCAGGCGCTGGAGACGACGTGGGAGGCGCTGAAAGCGCGGGCATCCACCGAGACGTTGCGCGGACGACACCCGGCTG<br/> TTCGTGGCATGTCCACCAGGGCTACGCGACCGGGCGTCCGCGCCGGAGGACGCGCTGACGGTACCTGCTCACCGGCAACACC<br/> GCGAGCGTCCGCTCGGGACGCATCGCTACGTGCTGGGGCTGGAAGTCCCGCGCTGACGGTGGACACGGCGTGTTCGTGCTGTTG<br/> GTGGCGTTGCACACGGGTGTGGGTGCTGGTGCAGGCTGACTGCGGTCTTCGCGGTGGCCGGTGGTGTGTCGGTATGGCGGGTCCG<br/> GAGGTGTTACCGAGTTCTCCCGCAGGGCGCGCTCCTCGCCGACGGCCGGTGCAAGCCCTTCTCGGACGAGGCGGACGGATTCCGGT<br/> CTCGGGGAGGTTCCGGCTTCGTGCTGCTCCAGCGTTGTCCGACGCCAGGCGGGAGGGCCCGCGCTGCTCGGCTGGTGGCCGG<br/> TCCGCGGTGAACCAGGACGGCGGAGCAACGGGCTCCTCGCTCCGAGCGCGTCCGCGACGAGCGGGTCACTCCCGCGGGCGTGGGG<br/> CGTGGCGGATTCAGGGCGCGATGTGGCCGTGGAGGACGACGCGCATGCTGCGGAGCCGGTACGCGGCTGGCGGACCGGTGGAGCCGCG<br/> TTGCTGGTACTTACGGCAAGTCGCGCGGGTCTGCGGGCCCGTGTGCTGGGTTCGGTGAAGTCAACATCGGTACGCGCAGGCG<br/> GCCCGGGTGTGCGGGCGTATCAAGGTGCTGCTCGCCCTGGAACGCGGTGTGGTCCCCCGATGCTGTGCGGGGCGAGAGGTCG<br/> GGCCTCATGACTGGTCTCCGGGAGATCGAGCTCGCAGACGCGCTGCGGGAGTGGTCCCGCCCGCGGACGGGTGCGCCGGGCA<br/> GTTGCTGTCGCGGCGGATGCGCGGACGCGCATGCTGCGGAGCCGCGGAGCCGGAACCGGAGCCGCGGAGCCGCGGCGGCG<br/> CGCATGCTGCCCGCAGCCGGGTGGTGGCGTCTGCTGTCGCGCAGGACCGGGCGGGTGGCGGCGCAGGCGCGCAGGCTCGCC<br/> GACCACCTCGCGCGCATCCCGGGATCGCACCGCGGACGCTGAGCTGGACGATGGCGCGGGCCCGCAGCACTTCGAGGAGCGGGG<br/> CGGCTGCTCGCCCGGACACCGCGAGGCGGTGACCGGTTGCGGGCGGTGGCCGACGCGCGGTGGTTCCTCGGTGTTGTACCGGC<br/> AGTGCCTCCGACGGTGGTTCAGTGTTCGTCTTCCCTGGGCGGGTGGCCAGTGGGAAGGCATGGCGCGGGAGTTGTTGCCGGTCCC<br/> GTCTTCGCGGAGTCGATCGCCGAGTGCATGCGGTGTTGTGCGGAGTGGCCGATTCCTCGGTGTCGAGGTGCTGGAGCCACGTCCG<br/> GACGCGCGTCTGCGGAGCGGTGCGAGTGTGCGAGCGGTGCTGTCGCGGTGATGGTGTGCTGGCGCGGTGTTGGCGTGCCTGC<br/> GGTGCCGTTTCTTCGGCCGTCATAGGGCACTCGCAGGGTGAATCGCCCGCGGGTGGTGGCGGGAGCGTTGTGCTGGAGGACGCG<br/> ATGCGGTCGCTCGCCCGCGTCCGAGGGCGGTGCGTGGCGTCCGCGGGCCGGGGAGCATGCTCCTGCGCGCGCGCGGCTCCGAC<br/> GTGAGAAGCTGCTCGCCGACGACGCTGGACCGGAGGCTGGAGGTCGCGCGGTCAACCGCCCGGACGCGGTGGTGGTGGCGGGT<br/> GACGCCAGGGCGCGCGGAGTTCCTGGAGTACTGCGAGGGCGTGGGCATCCGCGCCCGCGGATCCCGGTGGACTACGCCTCGCAC<br/> ACCGCGACGTCGAGCCCGTGCAGCGCAACTGGTCCAGGCGGTGGCCGGGATACCCCGGACGCGGCGGAGGTGCGGTTCTTCTCC<br/> ACCTGACCGCGACTTCTTCGACGGCAGCAGCTGGACGCGGGCTACTGGTACCGCAACTGCTGCTACCCGGTGGAGTCCCACTCC<br/> CCCGTGCAGGGCGTGAACCGACAGGATACGCGACTTATCGAGGTGACGCCCGCACCCCGTGGCTGGCGCTCGAGCCTCCAGGAGACC<br/> CTGACGACGCGGAGTCGACGCGGGTGTGCTGGGACGCTGGAACGCGACGCGGGCGACCGCGACCGCTTCTCACGGCACTCGCC<br/> GACGCGCACACGCGCGGTGTGCGGGTGCAGTGGGAAGCGGTGCTCGCCCGGGCCGACTGGTGCACCTGCCGGGTATCTCTTCCAG<br/> CCGAAGCGGTTCTGGTGTGCGCGACCGCACCCCTCGTGACGAGCTCGACGGCTGGTTCACCGGTGACTGGACCGGAGGTG<br/> CCGGCTCCGAACTGCCCGCTGCGCGGCGTGGCTCGTGGTGGTCCCGAGGGGACAGGAGGACGGCTGGACCGTGGACCGTGGAGGTG<br/> CGGTCCGCGCTCGCCGAGGCGCGCGCAACCGGAGGTCACGCGCGGCGTGGCGGGCTGGTGGTACTGCGCGGGCGTGGTGTG<br/> TTGCTCGCCCTCGAGGGCGATGGTGCGGTGCAAACCTTGTGCTGGTGGCGGAACTCGACCGCGAGGGCATCGACGCGCCACTGTGG<br/> ACGGTACCTTCGCGCGGTGACGCGGGCAGTCCGGTGGCCCGCCCGGACAGGCGAAGCTGTGGGGCTGGGCCAGGTCCGCTCC<br/> CTGGAACGAGGCGCCCGTGGACCGGCTCTGCACTGCCGACATGCGGAGGTCAGCGGACCGGAACTGCGAGGCGCTCACCGGGTGTG<br/> GCCGGCTCGGAGGACAGGTCCGGTGGCGCGGACCGCTGCGTGGCGGGCGCTTCCCGCCCGCAGCTCACCGCCACTCGGAG<br/> TACGCGGTGCCGGGCGGCAACCTCTGGTACCGGTGGCACCGCGGCTGGGCGCGGAGGTGGCCCGGTGGCTCGCCGGTCCGCGG<br/> GCCGAACACTCGCGTGGTACGACGGGAGGCGCGGACACCGAGGGCGTGGCGGACCTGACCGCGGAGCTGACCGGGCTCGGCGG<br/> CGGGTGTCCGTGCACCGTGCAGCTCAGCAGCCCGCAACCGGTGAGGGAACCTGTCACCGGCTGATCGAGCAGGGCGACGTCTGTC<br/> CGGGTGTGGTGCACGCGGGGACTGCCGACGAGTCCGATCAACGACATGGACGAGGCGGCTTCGACGAGGTGGTCCGCGG<br/> AAGGCCGGGGCGCGGTGCACCTGGACGAGCTGTGCTCGGACCGGAGCTGTTCTGCTGTCTCTCCCGGGGCGGGGTGTGGGGA<br/> AGCGCCCGCAGGGCGCTACCGCGGGCAACCGCTTCTGGACGCTTCCCGCGGACCGCGGGGCGCGGCTGCCCGCCACG<br/> TCGGTGGCGTGGGGCTGTGGGCGGGCGGGCGCATGACCGGCGACGAGGAGGCGGTGTCGTCTCGCGGAGCGCGGTGTGCGGGG<br/> ATGCCCGTACCGCGGCGCTCGCCGCTGGACAGGTTGCTGGCTCCGGGAGACGGCGGTGGTGTGACGGACGTGGACTGGCCC<br/> GCCTTCGCGGAGTCTACACCGCGCGCGCGCGCGGCTGCTCGACCGCATCGTCACGACCGCGCGGAGCGAGCGGGGCGGAGAA<br/> CCGGAGACGGAGGCTGCGGACCGGCTGGCGGGTCTGCCGCTGCCGAGCGGACGGCGGAGTGGTGGCGCTGGTCCGACACG<br/> ACCGGACCGTGGGCGACGACACCGAAGGCGGTGCGCGGACGCGGCTTCAAGGAGCTCGGGTTCGACTGCTGGCGGCGG<br/> GTCCGGTGCACACTGCTCAACGCGGCCACCGGCTCCGCTGCGGTGACGCTGGTCTCGACACCGAAGCGCTCCGCGGT<br/> GCCGTTCTTCGACGCGGAGTCTC</p> |

| Construct        | DNA sequence                                                                                                                                                                                                                                                                                                                                                                                                                                                                                                                                                                                                                                                                                                                                                                                                                                                                                                                                                                                                                                                                                                                                                                                                                                                                                                                                                                                                                                                                                                                                                                                                                                                                                                                                                                                                                                                                                                                                                                                                                                                                                                                                                                                                                                                                                                                                                                                                                                                                                                                                                                                                                                                                                                                                                                                                                                                                                                                                                                                                                                                                                                                                                                                                                                                                                                                                                                                                                                                                                                                                                                                                                                                                                                                                                                                                                                                                                                                                                                                                                                                                                                                                                                                                                                                                                                                                                                                                                                                                                                                                                                                 |
|------------------|----------------------------------------------------------------------------------------------------------------------------------------------------------------------------------------------------------------------------------------------------------------------------------------------------------------------------------------------------------------------------------------------------------------------------------------------------------------------------------------------------------------------------------------------------------------------------------------------------------------------------------------------------------------------------------------------------------------------------------------------------------------------------------------------------------------------------------------------------------------------------------------------------------------------------------------------------------------------------------------------------------------------------------------------------------------------------------------------------------------------------------------------------------------------------------------------------------------------------------------------------------------------------------------------------------------------------------------------------------------------------------------------------------------------------------------------------------------------------------------------------------------------------------------------------------------------------------------------------------------------------------------------------------------------------------------------------------------------------------------------------------------------------------------------------------------------------------------------------------------------------------------------------------------------------------------------------------------------------------------------------------------------------------------------------------------------------------------------------------------------------------------------------------------------------------------------------------------------------------------------------------------------------------------------------------------------------------------------------------------------------------------------------------------------------------------------------------------------------------------------------------------------------------------------------------------------------------------------------------------------------------------------------------------------------------------------------------------------------------------------------------------------------------------------------------------------------------------------------------------------------------------------------------------------------------------------------------------------------------------------------------------------------------------------------------------------------------------------------------------------------------------------------------------------------------------------------------------------------------------------------------------------------------------------------------------------------------------------------------------------------------------------------------------------------------------------------------------------------------------------------------------------------------------------------------------------------------------------------------------------------------------------------------------------------------------------------------------------------------------------------------------------------------------------------------------------------------------------------------------------------------------------------------------------------------------------------------------------------------------------------------------------------------------------------------------------------------------------------------------------------------------------------------------------------------------------------------------------------------------------------------------------------------------------------------------------------------------------------------------------------------------------------------------------------------------------------------------------------------------------------------------------------------------------------------------------------------------------|
| M2<br>harmonized | <p>GAACCGATTGCAATTGTTGGTATGGCATGTCGTCTGCCGGGCGAAGTTGATAGCCCGGAACGTCTGTGGGAAGTATTACCAGCGGG<br/> CGTGATAGCCGAGCAGAAGTCCGGACGATCGTGGTTCGGGATGAACTGATGGCAAGCGATGCAGCAGGGACCCGTCGTGCA<br/> CATGGTAACTTTATGGCAGGTGCAGGGGATTTTATGACAGCATTTTTTGGCATTAGCCCGGTGAAGCACTGGCAATGGATCCGCAG<br/> CAGCGTCAGGCACTGGAAACAACATGGGAAGCACTGGAGAGCGCAGGTATTCCTCCGAAACACTACGTGGTAGCGATACCCGTTGTT<br/> TTTGTGGTATGAGCCATCAGGGTTATGCAACCGGCAGGCCGCTCCGGAAGATGGTGTGATGGCTATCTGCTGACCCGTTAACACC<br/> GCAAGCGTTGCAAGCGGGCGTATTGCCTATGTTCTGGGCCCTGGAGGGGCCGCACTGACAGTTGATACAGCAgtAGCAGCAGCCTA<br/> GTTGCCACTACATACAGCATGCGGCAGCctcAGGGATGGGGATGTGGGctcGAGTTGCAAGGGGGGTTAGCGTTATGGCAGGGCCG<br/> GAAGTTTTTACCGAATTTAGCCGTCAGGGTGCAGTGCAGCCGGATGGTTCGTTGTAAGCCGTTTAGCGATGAAGCAGATGGGTTTGGG<br/> CTGGGCGAAGGGAGCGCATTGTTGTCTGCAGCGTCTAAGCGATGCACGAGTGAAGGTCGTCGTTCTGGGTGTTGTTGCAGGC<br/> AGCGCAGTTAACAGGATGGTGAAGCAACGGCCTGAGCGTCCGAGCGGTGTTGCACAGCAGCGTGTATTTCGTCGTGCATGGGCA<br/> AGGGCAGGCATTACAGGTGCAGAGTTCGAGTTGTTGAAGCAGCACCGGCACCGGGACACGTCGTGGGTCAGCCGTTGAAGCAGCGCA<br/> CTACTGGTACTTATGGTAAGAGCCGTGGCAGCAGCGGTCCGGTTCGCTGGGAGCGTTAAGAGCAACATTGGGCATGCACAGGCA<br/> GCAGCAGGGGTTGCAGGTGTTATTAAGGTTCTGCTGGGTCGGAGCGTGGGGTGTTCCTCCGCGATGCTGTGTCGTGGTGAAGCAAGC<br/> GGTCTGATTGATTGGAGCAGCGGTGAAATGAACTGGCTGATGGTGTTCGTTGAATGGAGCCCGGCAGCAGATGGCGTTCGTCGTGCT<br/> GGGCTAGCGATTTGGCGTTAGCGGCACAACGCACATGTTATTTAGAGAACCGCCGGAGGTTCCGCGATGCAAGCAGCGGAGG<br/> CGTATGCTGCCGCAACCGGGTGTTCGGTGTTCGAGCGCACGAACCGGCAGCACTACGTCACAGGCAGGTGCGACTGGCA<br/> GATCATCTGGCAGCACACCCGGGCATGCTCCGGCAGATGTAGCTGGACAATGGCAGCTGCAGTGCAGCATTGTAAGAAGCTGCA<br/> CAGTTCTGGCAGCAGATACCCGAGAACGAGTTCATCGTCTACGTGCAGTTGCAGATGGTGCAGTTGTACCGGGGTTAGTTACCCTG<br/> TCGGCAAGCATTGGGGTTCGGTTTTTGTTCCTCCGCGCACAGTGGGAGGGTATGGCAGTGAActcTACCGTACC<br/> GTTTTTGCAGAAAGCATTGCAGAAATGTGACGAGTTCCTAAGCGAAGTTGCAGGGTTTAGCGTTAGCGAAGTTTGGAAACCCAGGCCG<br/> GATGCACCCGAGCCTGGAACGTGTTGATGTTGTTTCAGCCGGTTCGTTTGCAGTTATGGTTAGCCTGGCAGCTCTATGGAGGGCATGT<br/> GGGGCAGTACCAGCGCAGTTATAGGCCATAGCCAGGGGAAATTCGAGCAGCAGTTGTTGAGGGGCACCTAAGCCTGGAAGATGGT<br/> ATGCGTGTGTTGCAGCTCGTAGCCGAGCAGTTAGGGCAGTTGCAGGTCGTTGGCAGCATGCTGAGCGTTCGTTGGTGGTTCGTAGCGCA<br/> CTTGAAGAGCTGCTGGCAGATGATAGCTGGACCGGTCGACTGGAAGTTGCAGCAGTTAACCCTCCGGATGCAGTTGTTGTTGCAAGG<br/> GATGCACAGGCAGCAGTGAATTTCTGGAATATTGTGAAGTGTGGTATTTCGTCAGCTGCAATTCGGTTGATTATGCAAGCCAT<br/> ACCGCAGATGTTGAACCGGTTGCTGATGAGCTGGTTCAGGCACTGGCAGGCATTACCCCGAGGCGTGCAGAAAGTTCGGTTTTTTCAGC<br/> GCAGTTACAGGCACTGACCGATCAGGGGATGCAACATTTATTTGAAGTTAGCCCGCATCCGGTTCGGCAAGCAGCGTTACGGAAACC<br/> CTGGATGATGCAGAAAGCGATGCAGCAGTTCTGGGCACACTGGAGCGTGCAGGTTGATGCAGATCGTTTTCTGCAGCTCTGGCA<br/> GATGCACATACAGTGGGGTTGCAGTTGATTGGGAGGCAGTTCGGGTCGTCAGGGCTGGTTGATCTGCCGGGGTACCCCTTTTCAG<br/> GGTAAGCGTTTTTGGCTGCTGCCGGATCGTACCACCCCGAGGATGAACGGATGGTGGTTTTATCGTGTGATTGGACCGAAGTT<br/> CCGCGTAGCCAGCCCGCAGCACTGCGTGGTAGGTGGCTGGTGTTCGCGAAGGCCATGAAGAAGATGGTTGGACCGTTGAAGTT<br/> CGTAGCCACTGGCAGAAGCAGGTGCAGAGCCGGAAGTTACACGTGGTGTGGTGGCCTGGTTGGGATTTGTCAGGTGTTGTTAGC<br/> CTACTGGCACTGGAAGGTGACGGGGCAGTTCAAACCTAGTCTCGTTCGTTGAGCTGGATGCAGAAAGGTATGATGCACCCCTGTGG<br/> ACAGTTACCTTTGGTGCAGTTGATGCAGGTTCCCGGTTGCAGCTCCGGATCAGGCAAAGCTGTGGGGCCTGGGTACAGGTTGCAAGC<br/> CTGGAGCGTGGCCCGGTTGGACCGGTCGTTGATCTGCCGCACATGCCGGATCCGGAGCTGAGGGGTAGGCTGACCCGAGTTCTG<br/> GCAGGTAGCGAAGATCAGGTTGCAGTTTCGTCAGATGCAGTTAGGGCAGCTCGTCTAAGCCCGGCACATGTTACCGCAACCAGCGAA<br/> TATGCAGTTCCGGGTGGTACTATTCTGGTTACCGGGGGTACCGCAGGTCGGGTGCAGAAAGTTGCAGCTGGCTGGCAGGGCGTGGT<br/> GCAGAGCATCTGGCACTGGTTAGCCGAAGGGTCCGGATACCGAAGGTGTTGGTGCATCTGACCCGCAAGTACCCGCTCTGGGTGCA<br/> CGTGTAGCGTTTCATGCATGTGATGTTAGCAGCCGTTGAGCCGTTTCGAGAGCTGGTTCATGTTGATTTGAACAGGGTGCATGTTGTT<br/> CGTGGGGTGTTCATGCAGCAGGGCTGCCGAGCAGGTTGCAATTAACGATATGGATGAAGCAGCATTGATGAAGTGTGTCAGCA<br/> AAGGCAGGCGGTGCAGTTTCATCTGGATGAACGTGTGAGCGATGCAGAACTGTTCTGCTGTTTAGCAGCGCGCAGGCGTTGGGGG<br/> AGCGCACGTCAGGGTGCCTATGCAGCAGGTAACGCATTTCTGGATGCATTTGCACGTCATCGTTCGTTGGTTCGTTGCCGGCAACA<br/> AGCGTTGCATGGGGCCTGTGGGCAGCAGGTGGTATGACCGGTGATGAAGAAGCAGTTAGCTTTCTGCGTGAACGTTGGGGTTCGTCGA<br/> ATGCCGTTACCGGTCAGTGGCAGCACTGGATCGAGTTCTGGCAAGCGCGAAACAGCAGTTGTTGTTACAGATGTTGATTGGCCG<br/> GCATTTGCAGAAAGCTATACCGCAGCAGTCCGCGTCCGCTACTGGATCGTATTGTTACAACCGCACCGAGCGAACGTGCAGGGGAG<br/> CCGAAACAGAAAGCTGCGTGCATGCTGCGAGGGCTGCCGAGGGCAGAACGTACAGCAGAACTGGTTCGTCGTTGTTGTTACCAGC<br/> ACCGCAACCGTTCTGGTGCATGATGATCCGAAGGCAGTTCTGTGCAACCCACCGTTTTAAGGAAGTGGGCTTTGATAGCCTGGCAGCA<br/> GTTCTGCTGCGTAACTGCTGAACCGCAGCAACCGCCTGCGTCTGCCGAGCACACTGGTTTTTGTATCATCCGAACGCAAGCGCAGTT<br/> GCAGGGTTTTCTGGATGCAGAACTG</p> |

**Table S3. Experimental scattering data derived parameters for Construct A and B.** Values calculated from frame numbers 1618-1641 for construct A and 1619-1646 for construct B.

|                                            | <b>Construct A</b>          | <b>Construct B</b>          |
|--------------------------------------------|-----------------------------|-----------------------------|
| Protein ID                                 | MK53                        | ADD01                       |
| Domain-Structure                           | MBP-M2-dd2                  | KR1-ACP1-M2-TE              |
| <b>Data Collection Parameters</b>          |                             |                             |
| Beamline                                   | BM29                        | BM29                        |
| Type of experiment                         | SEC-SAXS                    | SEC-SAXS                    |
| Wavelength (Å)                             | 0.992                       | 0.992                       |
| Detector distance (m)                      | 2.87                        | 2.87                        |
| $q$ range (Å <sup>-1</sup> )               | 0.005 - 0.028               | 0.006- 0.028                |
| Exposure time (s)                          | 1                           | 1                           |
| Temperature (°C)                           | 20                          | 20                          |
| <b>SEC Parameters</b>                      |                             |                             |
| SEC column                                 | Superose 6 increase 10/300  | Superose 6 increase 10/300  |
| Amount loaded (nmol)                       | 2.54                        | 2.02                        |
| Flow rate (mL/min)                         | 0.6                         | 0.6                         |
| Ve (mL)                                    | 44.62                       | 44.58                       |
| <b>Structural Parameters</b>               |                             |                             |
| Mw theoretical - (kDa)                     | 403                         | 484                         |
| Mw Vc / Vp - (kDa)                         | 408 / 494                   | 488 / 558                   |
| I(0) from Guinier                          | 157 ± 1                     | 139 ± 1                     |
| R <sub>g</sub> from Guinier - (Å)          | 77.2 ± 0.2                  | 76.6 ± 0.2                  |
| I(0) from P(r) GNOM/BIFT                   | 160 ± 1 / 159 ± 1           | 140 ± 1 / 140 ± 1           |
| R <sub>g</sub> from P(r) - (Å) GNOM/BIFT   | 80.7 ± 0.2 / 80.2 ± 0.1     | 79.3 ± 0.2 / 79.1 ± 0.1     |
| D <sub>max</sub> from P(r) - (Å) GNOM/BIFT | 283 / 268                   | 286 / 278                   |
| <b>Software</b>                            |                             |                             |
| Data processing                            | BioXtas RAW, PRIMUS, Python | BioXtas RAW, PRIMUS, Python |

**Table S4.** Dimeric interfaces in construct *A* and *B*. Interfaces of docking domain (DD) and TE were calculated with atomic structures of protein databank files (pdb) as indicated <sup>15,17</sup>. The interface of the KS dimer was calculated with the modeled KS-AT structure used in this study (see SI Material and Methods). Interfaces were calculated with the PDBePISA <sup>48</sup>.

| Construct <i>A</i> |             |           | Construct <i>B</i> |             |           |
|--------------------|-------------|-----------|--------------------|-------------|-----------|
| Domain             | Coordinates | Interface | Domain             | Coordinates | Interface |
| KS-AT              | Modeler     | 2410.8    | KS-AT              | Modeler     | 2410.8    |
| DD*                | 1pzq        | 1628      | TE                 | 1kez        | 879.1     |

**Table S5. Distances computed for the cross-links measured within single protein domains.**

| <b>Domain</b>              | <b>Residue 1</b> | <b>Residue 2</b> | <b>Distance</b> |
|----------------------------|------------------|------------------|-----------------|
| <b>High frequency hits</b> |                  |                  |                 |
| KS-AT <sub>2</sub>         | K727             | A693             | 20.11           |
| KS-AT <sub>2</sub>         | K727             | D699             | 13.44           |
| KS-AT <sub>2</sub>         | K727             | V703             | 15.16           |
| KS-AT <sub>2</sub>         | K727             | S778             | 19.41           |
| KS-AT <sub>2</sub>         | K727             | D782             | 11.87           |
| KS-AT <sub>2</sub>         | K727             | S784             | 12.65           |
| KS-AT <sub>2</sub>         | K727             | S785             | 9.77            |
| KS-AT <sub>2</sub>         | K727             | G786             | 6.94            |
| KS-AT <sub>2</sub>         | K727             | E787             | 6.69            |
| KS-AT <sub>2</sub>         | K727             | E796             | 23.56           |
| KS-AT <sub>2</sub>         | K727             | G816             | 25.42           |
| KS-AT <sub>2</sub>         | K741             | V702             | 15.69           |
| KS-AT <sub>2</sub>         | K1071            | E1104            | 15.09           |
| KS-AT <sub>2</sub>         | K1071            | L1106            | 14.06           |
| KS-AT <sub>2</sub>         | K1071            | E1107            | 15.8            |
| KS-AT <sub>2</sub>         | K1071            | Y1108            | 12.94           |
| KS-AT <sub>2</sub>         | K1273            | V1251            | 34.67           |
| KS-AT <sub>2</sub>         | K1273            | E1254            | 35.47           |
| KR2                        | K1407            | A1396            | 16.87           |
| KR2                        | K1407            | G1397            | 18.59           |
| KR2                        | K1407            | P1399            | 16.05           |
| KR2                        | K1407            | A1401            | 12.97           |
| KR2                        | K1407            | I1576            | 13.64           |
| KR2                        | K1407            | D1578            | 16.79           |
| KR2                        | K1407            | M1579            | 13.21           |
| KR2                        | K1407            | D1580            | 12.87           |
| KR2                        | K1407            | A1583            | 13.26           |
| KR2                        | K1407            | F1584            | 9.77            |

| <b>Domain</b>                | <b>Residue 1</b> | <b>Residue 2</b> | <b>Distance</b> |
|------------------------------|------------------|------------------|-----------------|
| KR2                          | K1407            | D1585            | 10.15           |
| KR2                          | K1407            | E1586            | 13.62           |
| KR2                          | K1407            | V1587            | 13.3            |
| ACP2                         | K1775            | R1759            | 10.74           |
| ACP2                         | K1784            | L1808            | 18.39           |
| ACP2                         | K1784            | L1812            | 11.77           |
| ACP2                         | K1784            | F1814            | 8.37            |
| ACP2                         | K1784            | D1815            | 11.29           |
| ACP2                         | K1784            | H1816            | 9.89            |
| ACP2                         | K1784            | N1818            | 9.08            |
| ACP2                         | K1784            | A1819            | 11.16           |
| ACP2                         | K1784            | S1820            | 14.26           |
| ACP2                         | K1784            | A1821            | 13.75           |
| ACP2                         | K1784            | V1822            | 13.17           |
| ACP2                         | K1784            | E1829            | 22.1            |
| <b>Medium frequency hits</b> |                  |                  |                 |
| KS-AT <sub>2</sub>           | K623             | G525             | 28.21           |
| KS-AT <sub>2</sub>           | K623             | Y526             | 29.51           |
| KS-AT <sub>2</sub>           | K623             | G539             | 42.72           |
| KS-AT <sub>2</sub>           | K623             | Y540             | 40.51           |
| KS-AT <sub>2</sub>           | K623             | V598             | 22.74           |
| KS-AT <sub>2</sub>           | K623             | S599             | 20.82           |
| KS-AT <sub>2</sub>           | K623             | P624             | 3.75            |
| KS-AT <sub>2</sub>           | K727             | T696             | 12.36           |
| KS-AT <sub>2</sub>           | K727             | G697             | 9.57            |
| KS-AT <sub>2</sub>           | K727             | A698             | 9.85            |
| KS-AT <sub>2</sub>           | K727             | V700             | 13.44           |
| KS-AT <sub>2</sub>           | K727             | I781             | 14              |
| KS-AT <sub>2</sub>           | K727             | S815             | 28.86           |
| KS-AT <sub>2</sub>           | K727             | I822             | 19.02           |
| KS-AT <sub>2</sub>           | K727             | I823             | 21.53           |

| <b>Domain</b>      | <b>Residue 1</b> | <b>Residue 2</b> | <b>Distance</b> |
|--------------------|------------------|------------------|-----------------|
| KS-AT <sub>2</sub> | K741             | D699             | 24.82           |
| KS-AT <sub>2</sub> | K741             | V700             | 21.01           |
| KS-AT <sub>2</sub> | K741             | V703             | 13.16           |
| KS-AT <sub>2</sub> | K741             | L712             | 16.07           |
| KS-AT <sub>2</sub> | K741             | V716             | 17.03           |
| KS-AT <sub>2</sub> | K741             | E717             | 14.44           |
| KS-AT <sub>2</sub> | K741             | L721             | 17.8            |
| KS-AT <sub>2</sub> | K741             | L722             | 20.17           |
| KS-AT <sub>2</sub> | K758             | V702             | 11.53           |
| KS-AT <sub>2</sub> | K758             | V703             | 10.75           |
| KS-AT <sub>2</sub> | K758             | E704             | 8.08            |
| KS-AT <sub>2</sub> | K1071            | Q940             | 32.78           |
| KS-AT <sub>2</sub> | K1071            | W941             | 35.62           |
| KS-AT <sub>2</sub> | K1071            | L1082            | 12.49           |
| KS-AT <sub>2</sub> | K1071            | V1084            | 11.19           |
| KS-AT <sub>2</sub> | K1071            | Y1123            | 23.73           |
| KS-AT <sub>2</sub> | K1071            | A1124            | 20.3            |
| KS-AT <sub>2</sub> | K1071            | H1126            | 18.25           |
| KS-AT <sub>2</sub> | K1071            | A1128            | 17.56           |
| KS-AT <sub>2</sub> | K1071            | H1129            | 20.57           |
| KS-AT <sub>2</sub> | K1273            | D1252            | 35.64           |
| KR2                | K1407            | W1387            | 14.98           |
| KR2                | K1407            | T1388            | 11.92           |
| KR2                | K1407            | V1389            | 12.5            |
| KR2                | K1407            | T1390            | 10.51           |
| KR2                | K1407            | V1394            | 10.69           |
| KR2                | K1407            | S1398            | 17.99           |
| KR2                | K1407            | L1426            | 11.4            |
| KR2                | K1407            | V1427            | 13.25           |
| KR2                | K1407            | E1474            | 32.63           |
| KR2                | K1407            | Y1475            | 31.81           |



| <b>Domain</b> | <b>Residue 1</b> | <b>Residue 2</b> | <b>Distance</b> |
|---------------|------------------|------------------|-----------------|
| KR2           | K1407            | N1577            | 16.65           |
| KR2           | K1407            | E1581            | 10.36           |
| KR2           | K1407            | A1582            | 13.06           |
| KR2           | K1407            | Q1623            | 12.34           |
| KR2           | K1407            | G1624            | 9.89            |
| KR2           | K1407            | Y1626            | 9.67            |
| KR2           | K1407            | A1627            | 7.01            |
| ACP2          | K1784            | V1813            | 8.2             |
| ACP2          | K1784            | P1817            | 8.45            |
| ACP2          | K1784            | A1823            | 13.75           |
| ACP2          | K1784            | G1824            | 13.17           |
| ACP2          | K1784            | F1825            | 16.55           |
| ACP2          | K1784            | L1826            | 18.15           |
| ACP2          | K1784            | A1828            | 18.62           |

**Table S6. Number of conformations ranked at highest weight that match the cross-links measured within construct A.** All experimental data was obtained with construct A of which experiments (Exp. 1 – Exp. 3) were performed with apo- and experiment Exp. 4 with phosphopantetheinylated holo-protein. Conformation show the total number (tot) of conformations that capture the cross-links and their BioEn cumulative weight (c. w.). The number of conformations was calculated based on the observed number of cross-linked peptide spectrum matches (CSMs) supporting a specific cross-link measured for construct A only and captured by  $A_{ext}$ ,  $A_{arch}$ , and  $B_{ext}$ . Hits were sorted into “high frequency” hits (appearing more than twice in multiple experiments) or “medium frequency” hits (appearing once and/or twice in multiple experiments). Domain nomenclature: KS- ketosynthase, AT- acyltransferases, ACP- acyl carrier protein, KR – ketoreductase, LD – linker domain, DD- docking domain, and MBP- maltose binding protein.

| Cross-linked Residues      |           |                |           |          | Experimental # |        |        |                        | Conformation #  |                  |                  |                   |                 |                  |
|----------------------------|-----------|----------------|-----------|----------|----------------|--------|--------|------------------------|-----------------|------------------|------------------|-------------------|-----------------|------------------|
| XL #                       | Residue 1 | Domain 1       | Residue 2 | Domain 2 | Exp. 1         | Exp. 2 | Exp. 3 | Exp. 4 <sup>holo</sup> | $A_{ext}$ (tot) | $A_{ext}$ (c.w.) | $A_{arch}$ (tot) | $A_{arch}$ (c.w.) | $B_{ext}$ (tot) | $B_{ext}$ (c.w.) |
| <b>High frequency hits</b> |           |                |           |          |                |        |        |                        |                 |                  |                  |                   |                 |                  |
| XL1                        | K727      | KS             | E279      | MBP      | 3              | 4      | 2      | 8                      | 17              | 4.59E-03         | 7                | 3.52E-07          |                 |                  |
| XL2                        | K727      | KS             | L281      | MBP      | 1              | 6      |        |                        | 9               | 3.87E-03         | 3                | 2.37E-07          |                 |                  |
| XL3                        | K727      | KS             | L285      | MBP      |                | 4      | 3      | 2                      | 1               | 8.32E-05         | 0                |                   |                 |                  |
| XL4                        | K727      | KS             | L286      | MBP      |                | 11     | 4      | 1                      | 3               | 2.25E-03         | 2                | 6.40E-06          |                 |                  |
| XL5                        | K727      | KS             | T1470     | KR2      |                | 3      | 1      |                        | 1               | 3.11E-05         | 8                | 2.73E-05          | 0               |                  |
| XL6                        | K1071     | AT             | F48       | MBP      |                | 5      | 3      | 1                      | 1               | 2.45E-05         | 0                |                   |                 |                  |
| XL7                        | K1071     | AT             | Q1623     | KR2      |                | 5      | 4      | 2                      | 0               |                  | 0                |                   | 0               |                  |
| XL8                        | K1273     | post-AT linker | E1474     | KR2      | 1              | 6      |        |                        | 393             | 1.55E-01         |                  |                   | 383             | 4.21E-01         |
| XL9                        | K1273     | post-AT linker | Y1475     | KR2      | 1              | 2      | 2      |                        | 432             | 2.15E-01         |                  |                   | 424             | 5.05E-01         |
| XL10                       | K1273     | post-AT linker | A1476     | KR2      | 1              | 2      | 1      | 2                      | 327             | 2.02E-01         |                  |                   | 350             | 4.05E-01         |
| XL11                       | K1273     | post-AT linker | I1482     | KR2      | 3              | 2      |        |                        | 85              | 1.36E-02         |                  |                   | 127             | 2.19E-01         |
| XL12                       | K1273     | post-AT linker | G1503     | KR2      | 5              | 4      |        |                        | 379             | 3.02E-01         |                  |                   | 425             | 3.91E-01         |
| XL13                       | K1273     | post-AT linker | A1683     | KR2      |                | 1      | 1      | 7                      | 628             | 3.18E-01         |                  |                   | 548             | 3.50E-01         |
| XL14                       | K1775     | ACP2           | V1295     | KR2      |                |        | 7      | 1                      | 64              | 8.35E-03         | 231              | 6.60E-03          | 76              | 4.18E-02         |
| XL15                       | K1775     | ACP2           | S1303     | KR2      | 3              | 4      | 2      | 3                      | 103             | 3.40E-02         | 169              | 6.50E-03          | 78              | 6.72E-02         |
| XL16                       | K1775     | ACP2           | E1304     | KR2      |                |        | 3      | 1                      | 68              | 2.94E-02         | 87               | 2.16E-03          | 50              | 5.63E-02         |
| XL17                       | K1775     | ACP2           | E1861     | DD       |                |        | 4      | 2                      | 165             | 5.14E-01         | 407              | 1.61E-01          |                 |                  |

| Cross-linked Residues        |           |                |           |          | Experimental # |        |        |                        | Conformation #         |                         |                         |                          |                        |                         |
|------------------------------|-----------|----------------|-----------|----------|----------------|--------|--------|------------------------|------------------------|-------------------------|-------------------------|--------------------------|------------------------|-------------------------|
| XL #                         | Residue 1 | Domain 1       | Residue 2 | Domain 2 | Exp. 1         | Exp. 2 | Exp. 3 | Exp. 4 <sup>holo</sup> | A <sub>ext</sub> (tot) | A <sub>ext</sub> (c.w.) | A <sub>arch</sub> (tot) | A <sub>arch</sub> (c.w.) | B <sub>ext</sub> (tot) | B <sub>ext</sub> (c.w.) |
| XL18                         | K1784     | ACP2           | G539      | KS       |                |        | 2      | 2                      | 32                     | 4.55E-03                | 0                       |                          | 25                     | 2.62E-02                |
| XL19                         | K1784     | ACP2           | I554      | KS       | 1              | 2      | 7      |                        | 0                      |                         | 0                       |                          | 0                      |                         |
| XL20                         | K1784     | ACP2           | Y556      | KS       | 6              | 5      |        |                        | 6                      | 2.67E-02                | 0                       |                          | 4                      | 8.01E-04                |
| XL21                         | K1784     | ACP2           | L560      | KS       | 7              | 1      | 1      | 1                      | 1                      | 1.75E-04                | 0                       |                          | 0                      |                         |
| XL22                         | K1784     | ACP2           | A894      | LD       | 6              |        | 1      |                        | 1                      | 3.97E-05                | 0                       |                          | 3                      | 7.44E-04                |
| XL23                         | K1784     | ACP2           | S1303     | KR2      | 3              | 3      |        |                        | 90                     | 6.48E-02                | 70                      | 1.39E-03                 | 77                     | 4.94E-02                |
| XL24                         | K1784     | ACP2           | H1468     | KR2      | 4              | 3      | 1      |                        | 74                     | 3.95E-02                | 48                      | 5.48E-02                 | 83                     | 7.00E-02                |
| XL25                         | K1784     | ACP2           | V1469     | KR2      | 1              | 1      | 6      |                        | 73                     | 2.08E-02                | 183                     | 5.11E-01                 | 92                     | 8.03E-02                |
| XL26                         | K1784     | ACP2           | S1473     | KR2      | 1              | 1      | 2      |                        | 108                    | 3.09E-02                | 825                     | 8.15E-01                 | 119                    | 8.96E-02                |
| XL27                         | K1784     | ACP2           | E1474     | KR2      |                | 2      | 2      |                        | 86                     | 2.91E-02                | 958                     | 6.11E-01                 | 100                    | 7.73E-02                |
| XL28                         | K1784     | ACP2           | L1845     | DD       | 2              | 4      |        |                        | 323                    | 2.33E-01                | 123                     | 5.51E-02                 |                        |                         |
| XL29                         | K47       | MBP            | L1408     | KR2      |                |        | 3      | 3                      | 0                      |                         | 0                       |                          |                        |                         |
| XL30                         | K143      | MBP            | L1408     | KR2      |                |        | 2      |                        | 0                      |                         | 0                       |                          |                        |                         |
| XL31                         | K145      | MBP            | L1408     | KR2      | 1              |        | 1      | 5                      | 0                      |                         | 0                       |                          |                        |                         |
| XL32                         | K180      | MBP            | Q667      | KS       |                | 3      |        |                        | 13                     | 9.81E-03                | 13                      | 3.22E-07                 |                        |                         |
| XL33                         | K180      | MBP            | D668      | KS       |                | 3      |        |                        | 22                     | 1.04E-02                | 14                      | 3.56E-07                 |                        |                         |
| XL34                         | K180      | MBP            | N672      | KS       |                | 5      | 1      |                        | 19                     | 1.15E-02                | 6                       | 2.10E-07                 |                        |                         |
| XL35                         | K180      | MBP            | N1088     | AT       |                | 5      | 2      |                        | 1                      | 6.30E-06                | 0                       |                          |                        |                         |
| XL36                         | K180      | MBP            | E1104     | AT       |                | 2      | 2      |                        | 0                      |                         | 0                       |                          |                        |                         |
| <b>Medium frequency hits</b> |           |                |           |          |                |        |        |                        |                        |                         |                         |                          |                        |                         |
| XL37                         | K1273     | post-AT linker | L1464     | KR2      | 1              | 1      |        |                        | 117                    | 1.12E-01                |                         |                          | 79                     | 4.66E-02                |
| XL38                         | K1273     | post-AT linker | S1465     | KR2      | 1              | 2      |        |                        | 193                    | 1.29E-01                |                         |                          | 149                    | 7.25E-02                |
| XL39                         | K1273     | post-AT linker | A1471     | KR2      | 1              |        | 1      |                        | 525                    | 6.53E-01                |                         |                          | 478                    | 4.90E-01                |
| XL40                         | K1273     | post-AT linker | S1473     | KR2      |                | 2      |        |                        | 469                    | 1.66E-01                |                         |                          | 451                    | 5.05E-01                |
| XL41                         | K1273     | post-AT linker | V1484     | KR2      |                | 3      |        |                        | 44                     | 4.56E-02                |                         |                          | 60                     | 4.11E-02                |

| Cross-linked Residues |           |          |           |          | Experimental # |        |        |                        | Conformation #         |                         |                         |                          |                        |                         |
|-----------------------|-----------|----------|-----------|----------|----------------|--------|--------|------------------------|------------------------|-------------------------|-------------------------|--------------------------|------------------------|-------------------------|
| XL #                  | Residue 1 | Domain 1 | Residue 2 | Domain 2 | Exp. 1         | Exp. 2 | Exp. 3 | Exp. 4 <sup>holo</sup> | A <sub>ext</sub> (tot) | A <sub>ext</sub> (c.w.) | A <sub>arch</sub> (tot) | A <sub>arch</sub> (c.w.) | B <sub>ext</sub> (tot) | B <sub>ext</sub> (c.w.) |
| XL42                  | K1775     | ACP2     | D538      | KS       |                |        | 1      |                        | 188                    | 1.72E-01                | 0                       |                          | 211                    | 1.87E-01                |
| XL43                  | K1775     | ACP2     | G539      | KS       |                |        | 2      |                        | 136                    | 1.53E-01                | 1                       | 5.68E-09                 | 140                    | 1.29E-01                |
| XL44                  | K1775     | ACP2     | Y540      | KS       |                |        | 6      |                        | 111                    | 1.87E-01                | 3                       | 2.63E-08                 | 112                    | 1.50E-01                |
| XL45                  | K1775     | ACP2     | I554      | KS       |                |        | 1      |                        | 22                     | 2.09E-03                | 0                       |                          | 7                      | 6.85E-03                |
| XL46                  | K1775     | ACP2     | Y556      | KS       | 1              |        | 7      |                        | 54                     | 9.06E-03                | 3                       | 6.13E-08                 | 34                     | 4.94E-02                |
| XL47                  | K1784     | ACP2     | Y540      | KS       |                |        | 3      |                        | 29                     | 4.93E-03                | 0                       |                          | 19                     | 2.14E-02                |
| XL48                  | K1784     | ACP2     | V598      | KS       |                | 4      |        |                        | 0                      |                         | 0                       |                          | 0                      |                         |
| XL49                  | K1784     | ACP2     | S599      | KS       |                | 3      |        |                        | 0                      |                         | 0                       |                          | 0                      |                         |
| XL50                  | K1784     | ACP2     | V600      | KS       |                | 4      |        |                        | 0                      |                         | 0                       |                          | 3                      | 1.32E-03                |
| XL51                  | K1784     | ACP2     | A1476     | KR2      |                | 1      | 1      |                        | 60                     | 1.58E-02                | 1069                    | 8.29E-01                 | 84                     | 6.91E-02                |
| XL52                  | K1784     | ACP2     | P1853     | DD       | 2              |        | 1      |                        | 248                    | 2.13E-01                | 67                      | 1.13E-02                 |                        |                         |
| XL53                  | K1784     | ACP2     | E1854     | DD       | 3              | 1      |        |                        | 364                    | 2.05E-01                | 159                     | 4.81E-01                 |                        |                         |
| XL54                  | K84       | MBP      | T496      | KS       |                | 9      |        |                        | 0                      |                         | 1                       | 2.04E-07                 |                        |                         |
| XL55                  | K84       | MBP      | T1701     | KR2      |                | 6      |        |                        | 0                      |                         | 0                       |                          |                        |                         |
| XL56                  | K84       | MBP      | V1703     | KR2      |                | 3      |        |                        | 0                      |                         | 0                       |                          |                        |                         |
| XL57                  | K203      | MBP      | D668      | KS       |                | 3      |        |                        | 15                     | 1.52E-03                | 10                      | 3.64E-07                 |                        |                         |
| XL58                  | K203      | MBP      | N672      | KS       |                | 4      |        |                        | 18                     | 2.32E-03                | 8                       | 1.06E-07                 |                        |                         |
| XL59                  | K240      | MBP      | S522      | KS       |                |        |        | 2                      | 0                      |                         | 0                       |                          |                        |                         |
| XL60                  | K240      | MBP      | G525      | KS       |                |        |        | 2                      | 0                      |                         | 0                       |                          |                        |                         |
| XL61                  | K240      | MBP      | P531      | KS       |                |        |        | 2                      | 0                      |                         | 0                       |                          |                        |                         |
| XL62                  | K240      | MBP      | R532      | KS       |                |        |        | 2                      | 0                      |                         | 0                       |                          |                        |                         |

\* XL19, 48, 49, and 50 were satisfied 42, 2, 12, and 178 times when mapping the XL-MS data over all 45000 sampled CG conformations.

**Table S7. Number of conformations ranked at highest weight that match the cross-links measured within construct B.** All experimental data was obtained with construct B as phosphopantetheinylated holo-protein. Conformation show the total number (tot) of conformations that capture the cross-links and their BioEn cumulative weight (c. w.). The number of conformations was calculated based on the observed number of cross-linked peptide spectrum matches (CSMs) supporting a specific cross-link measured for construct B and captured by  $B_{ext}$ . Although, the general reproducibility of CSMs of construct B was low, some XLs were reproduced between experimental data on construct A and B (Table S6). Domain nomenclature: KS- ketosynthase, AT- acyltransferase, ACP- acyl carrier protein, KR- ketoreductase, LD- linker domain, and TE- thioesterase.

| Cross-linked residues |           |                |           |        | Experimental #         |                        |                      | Conformation #  |                  |
|-----------------------|-----------|----------------|-----------|--------|------------------------|------------------------|----------------------|-----------------|------------------|
| XL #                  | Residue 1 | Domain 1       | Residue 2 | Domain | Exp. 1 <sup>holo</sup> | Exp. 2 <sup>holo</sup> | XL# from construct A | $B_{ext}$ (tot) | $B_{ext}$ (c.w.) |
| B-XL1                 | K217      | KR1            | V1274     | AT     |                        | 1                      | Domain absent in A   | 0               |                  |
| B-XL2                 | K217      | KR1            | N1275     | AT     |                        | 2                      |                      | 1               | 5.16E-06         |
| B-XL3                 | K217      | KR1            | W1484     | KR2    | 1                      |                        |                      | 0               |                  |
| B-XL4                 | K217      | KR1            | T1485     | KR2    | 1                      |                        |                      | 0               |                  |
| B-XL5                 | K810      | KS             | G259      | KR1    | 1                      |                        |                      | 4               | 2.91E-05         |
| B-XL6                 | K810      | KS             | G261      | KR1    | 1                      |                        |                      | 7               | 2.25E-04         |
| B-XL7                 | K810      | KS             | L263      | KR1    | 3                      |                        |                      | 4               | 2.91E-05         |
| B-XL8                 | K914      | KS             | V391      | KR1    |                        | 1                      |                      | 5               | 1.93E-04         |
| B-XL9                 | K914      | KS             | W393      | KR1    |                        | 4                      |                      | 20              | 3.51E-04         |
| B-XL10                | K914      | KS             | T395      | KR1    | 2                      |                        |                      | 38              | 7.37E-04         |
| B-XL11                | K914      | KS             | W396      | KR1    | 4                      |                        |                      | 44              | 7.33E-04         |
| B-XL12                | K1258     | AT             | G394      | KR1    | 1                      |                        |                      | 32              | 2.04E-03         |
| B-XL13                | K1258     | AT             | T395      | KR1    | 1                      |                        |                      | 32              | 2.00E-03         |
| B-XL14                | K1258     | AT             | W396      | KR1    | 1                      |                        |                      | 31              | 2.46E-03         |
| B-XL15                | K1460     | post-AT linker | S1660     | KR2    |                        | 1                      | -                    | 2315            | 5.35E-01         |
| B-XL16                | K1460     | post-AT linker | E1661     | KR2    | 2                      |                        | XL8                  | 1941            | 4.47E-01         |
| B-XL17                | K1460     | post-AT linker | Y1662     | KR2    | 2                      |                        | XL9                  | 2149            | 5.33E-01         |
| B-XL18                | K1460     | post-AT linker | A1663     | KR2    | 6                      |                        | XL10                 | 1671            | 4.27E-01         |
| B-XL19                | K1460     | post-AT linker | V1664     | KR2    | 5                      |                        | -                    | 1609            | 3.90E-01         |
| B-XL20                | K1460     | post-AT linker | S1790     | KR2    | 1                      |                        | -                    | 501             | 2.26E-01         |
| B-XL21                | K1460     | post-AT linker | E1793     | KR2    | 1                      |                        | -                    | 233             | 4.47E-02         |
| B-XL22                | K1594     | KR2            | V1120     | AT     | 1                      |                        | -                    | 0               |                  |
| B-XL23                | K1594     | KR2            | F1121     | AT     | 2                      |                        | -                    | 0               |                  |
| B-XL24                | K1594     | KR2            | E1143     | AT     |                        | 1                      | -                    | 0               |                  |
| B-XL25                | K1594     | KR2            | I1145     | AT     |                        | 1                      | -                    | 0               |                  |
| B-XL26                | K1962     | ACP2           | G186      | KR1    |                        | 1                      |                      | 2               | 2.53E-05         |

| Cross-linked residues |           |          |           |        | Experimental #         |                        |                      | Conformation #         |                         |
|-----------------------|-----------|----------|-----------|--------|------------------------|------------------------|----------------------|------------------------|-------------------------|
| XL #                  | Residue 1 | Domain 1 | Residue 2 | Domain | Exp. 1 <sup>holo</sup> | Exp. 2 <sup>holo</sup> | XL# from construct A | B <sub>ext</sub> (tot) | B <sub>ext</sub> (c.w.) |
| B-XL27                | K1962     | ACP2     | S1490     | KR2    | 1                      | 2                      | XL15                 | 398                    | 7.29E-02                |
| B-XL28                | K1971     | ACP2     | E2119     | TE     |                        | 1                      |                      | 170                    | 1.90E-02                |
| B-XL29                | K1971     | ACP2     | P2122     | TE     | 1                      |                        |                      | 879                    | 1.20E-01                |
| B-XL30                | K1971     | ACP2     | L2123     | TE     | 1                      |                        |                      | 1356                   | 2.80E-01                |

**Table S8. ELISA titration data.** Data and data mean from two individual plates coated with (3)KS3-AT3. Data means are plotted in Fig. S20.

|         | Phage amount | ACP2-2 | ACP1-2 | Lib1-Mut3 | Lib1-Mut5 | Lib2-Mut1 | Lib2-Mut3 | Lib2-Mut4 | Lib3-Mut1 | Lib3-Mut3 | Lib3-Mut4 | Lib3-Mut5 | Lib3-Mut6 | Lib3-Mut7 |
|---------|--------------|--------|--------|-----------|-----------|-----------|-----------|-----------|-----------|-----------|-----------|-----------|-----------|-----------|
| Plate1  | 2.3E+12      | 1.81   | 0.79   | 3.01      | 3.14      | 1.77      | 2.86      | 1.30      | 1.73      | 3.77      | 3.38      | 7.38      | 5.47      | 4.35      |
|         | 7.65E+11     | 1.42   | 0.72   | 2.12      | 2.32      | 1.29      | 2.01      | 0.97      | 1.28      | 2.94      | 2.66      | 4.28      | 3.80      | 3.54      |
|         | 7.65E+10     | 0.26   | 0.49   | 1.11      | 1.18      | 0.78      | 1.04      | 0.58      | 0.78      | 1.54      | 1.44      | 1.95      | 1.90      | 1.88      |
|         | 7.65E+9      | 0.04   | 0.30   | 0.66      | 0.68      | 0.47      | 0.72      | 0.39      | 0.49      | 0.85      | 0.94      | 1.12      | 1.20      | 1.07      |
| Plate 2 | 2.3E+12      | 2.29   | 1.08   | 3.48      | 3.8       | 2.23      | 4.27      | 1.64      | 2.12      | 5.19      | 4.22      | 6.79      | 5         | 5.11      |
|         | 7.65E+11     | 1.73   | 0.96   | 2.5       | 2.7       | 1.6       | 2.51      | 1.21      | 1.62      | 4.03      | 3.25      | 4.01      | 3.99      | 3.62      |
|         | 7.65E+10     | 0.27   | 0.53   | 1.15      | 1.13      | 0.83      | 1.12      | 0.61      | 0.88      | 1.67      | 1.47      | 1.76      | 1.92      | 1.82      |
|         | 7.65E+9      | 0.04   | 0.3    | 0.65      | 0.71      | 0.48      | 0.78      | 0.4       | 0.51      | 0.87      | 0.89      | 1.14      | 1.23      | 1.09      |
| Mean    | 2.3E+12      | 2.05   | 0.93   | 3.24      | 3.47      | 2         | 3.56      | 1.47      | 1.93      | 4.48      | 3.8       | 7.08      | 5.24      | 4.73      |
|         | 7.65E+11     | 1.58   | 0.84   | 2.31      | 2.51      | 1.45      | 2.26      | 1.09      | 1.45      | 3.49      | 2.95      | 4.15      | 3.9       | 3.58      |
|         | 7.65E+10     | 0.27   | 0.51   | 1.13      | 1.16      | 0.81      | 1.08      | 0.59      | 0.83      | 1.6       | 1.46      | 1.86      | 1.91      | 1.85      |
|         | 7.65E+9      | 0.04   | 0.3    | 0.66      | 0.69      | 0.47      | 0.75      | 0.4       | 0.5       | 0.86      | 0.91      | 1.13      | 1.22      | 1.08      |

**Table S9. Amino acid sequences and alignment of proteins used in this study and the length of the modeled domains.** Length of the modeled domains is indicated by the color coding: MBP (light gray), KR1 (yellow), ACP1 (pink on gray background), KS (blue), LD (dark gray), AT (green), KR2 (orange), ACP2 (magenta), and DD or TE (black).

| Construct                                   | Amino acid sequence                                                                                                                                                                                                                                                                                                                                                                                                                                                                                                                                                                                                                                                                                                                                                                                                                                                                                                                                                                                                                                                                                                                                                                                                                                                                                                                                                                                                                                                                                                                                                                                                                                                                                                                                                                                                                                                                                                                                                                                                                                                                                                                               |
|---------------------------------------------|---------------------------------------------------------------------------------------------------------------------------------------------------------------------------------------------------------------------------------------------------------------------------------------------------------------------------------------------------------------------------------------------------------------------------------------------------------------------------------------------------------------------------------------------------------------------------------------------------------------------------------------------------------------------------------------------------------------------------------------------------------------------------------------------------------------------------------------------------------------------------------------------------------------------------------------------------------------------------------------------------------------------------------------------------------------------------------------------------------------------------------------------------------------------------------------------------------------------------------------------------------------------------------------------------------------------------------------------------------------------------------------------------------------------------------------------------------------------------------------------------------------------------------------------------------------------------------------------------------------------------------------------------------------------------------------------------------------------------------------------------------------------------------------------------------------------------------------------------------------------------------------------------------------------------------------------------------------------------------------------------------------------------------------------------------------------------------------------------------------------------------------------------|
| A.<br>MBP-<br>M2(2)<br>(A <sub>ext</sub> )  | <p>MKIEEGKLVIIWINGDKGYNGLAEVGGKFEKDTGIKVTVEHPDKLEEKFPQVAATGDGPDIIFWAHDRFGGYAQSGLLAEITPDKAFQ<br/> DKLYPFTWDAVRYNGKLIAYPIAVEALSIIYNKDLLPNPPKTWEEIPALDKELKAKGKSALMFNLQEPYFTWPLIAADGGYAFKYEN<br/> GKYDIKDVGVNAGAKAGLTFVLVDLIKKNHMNADTDYSIAEAAFNGKETAMTINGPAWNSIDTSKVNYGVTVLPFTFKGQPSKPFV<br/> VLSAGINAASPNKELAKEFLENYLLTDEGLEAVNKDKPLGAVALKSYEEELVKDPRIAATMENAQKGEIMPNIQMSAFWYAVRTAV<br/> INAASGRQTVDEALKDAQTNSSNNNNNNNNNLGPGAAHYGSAAPATTA PVDEPIAIVGMACRLPGEVDSPERLWELITSGRDSAA<br/> EVPDDRGRWVPELMSADAAGTRRAHGNFMAGAGDFDAAFFGISPREALAMPQQRQALETWEALE SAGI PPETLRGSDTVGVFVGM<br/> HQQYATGRPRPEDGVDGYLLTGNTASVASGR IAYVLGLEGPALTVDTACSSSLVALHTACGSLRDGDCGLAVAGGVSVMAGPEVFTF<br/> FSRQGALSPDGRCKPFSDEADGFLGEGSAFVVLQRLSDARREGRVRLGVVAGSAVNQDGASNGLSAPSGVAQQRV IRRARARAGIT<br/> GADVAVVEAHGTGTRLDGDPVEASALLATYGKSRGSSGFPVLLGSKVSNIGHAQAAAGVAGVIKVLLGLERGVVPPMLCRGERSGLI<br/> SSGEIELADGVREWS PAADGVRRAVSAFGVSGTNAHVIIAEPPEPEFPVQPRRMLPATGVVPPVLSARTGAALRAQAGRLADHLAA<br/> HPGIAPADVSWT MARARQHFEERA AVLAA DTAEAVHRLRAVADGAVVPGVVTGSASDGGSVFVFPQGAQWEGMARELLPVVFAES<br/> IAECDAVLSEVAGFSVSEVLEPRPDAPSLERVDVVQPVLFVAVMVS LARLWRACGAVPSAVIGHQSQGEIAAAVVAGALSLEDGMRVVA<br/> RRSRARAVAGRGSMLSVRGRSDVEKLLADDSWTGRLEVA AVNGPDVAVVAGDAQAARE FLEYCEGVGIRARAI PVDYASHTAHVE<br/> PVRDELVQALAGITPRRAEV PFFSTLTGDFLDGTELDAGYWRNL RHPVEFHSVAVQALTDQGYATFIEVSPHPVLASSVQETLDDAE<br/> SDAAVLGTLERDAGDADRFLTALADAHTRGVAVDWEAVLGRAGLVDLPGYPFQGRFWLLPDRTTPRDELGWFYRVVDWEVPRSE<br/> AALRGRLVVVPEGHEEDGWTEVRSALAEAGAEPEVTRGVGGLVGDGAGVVSLLALEG DGAVQTLVLRLEDAEGIDAPLWTVTFG<br/> AVDAGSPVARPDQAKLWGLGQVASLERGPRWTGLVDLPHMPDPELRGRRLTAVLAGSE DQVAVRADAVRARRLS PAHVTTATSEYAVPG<br/> GTILVTGGTAGLGAEVARWLAGRGAEHLALVSRRGPDTEGVGDLTAE LTRLGARVSVHACDVSSREPVRELHVHGLIEQGDVVRGVVH<br/> AAGLPQQVA INDMDEAAFDEVVAAKAGGAVHLDELCSDAELFLLFSSGAGVWGSARQ GAYAAGNAFLDAFARHRRGRGLPATSVAWG<br/> LWAAGMTGDEEAVSFLRERGV RAMPVPRALAALDRVLASGETAVVVT DVDWPAFAESYTAARPRLLDRIVTTAPS ERAGEPETES<br/> LRDRLAGL PRAERTAE LVRLVRTSTATV LGHDDPKAVRATTPFEKELGFD SLAAVRLRNLLNAATGLRLPSTLVFDHPNASAVAGFLD<br/> AETGTEV RGEAPSALAGLDALAEALPEVPATEREELVQRLERMLAALRPVAQQAADASGTGANPSGDDLGEAGVDELLEALGREL DGD</p> |
| A.<br>MBP-<br>M2(2)<br>(A <sub>arch</sub> ) | <p>MKIEEGKLVIIWINGDKGYNGLAEVGGKFEKDTGIKVTVEHPDKLEEKFPQVAATGDGPDIIFWAHDRFGGYAQSGLLAEITPDKAFQ<br/> DKLYPFTWDAVRYNGKLIAYPIAVEALSIIYNKDLLPNPPKTWEEIPALDKELKAKGKSALMFNLQEPYFTWPLIAADGGYAFKYEN<br/> GKYDIKDVGVNAGAKAGLTFVLVDLIKKNHMNADTDYSIAEAAFNGKETAMTINGPAWNSIDTSKVNYGVTVLPFTFKGQPSKPFV<br/> VLSAGINAASPNKELAKEFLENYLLTDEGLEAVNKDKPLGAVALKSYEEELVKDPRIAATMENAQKGEIMPNIQMSAFWYAVRTAV<br/> INAASGRQTVDEALKDAQTNSSNNNNNNNNNLGPGAAHYGSAAPATTA PVDEPIAIVGMACRLPGEVDSPERLWELITSGRDSAA<br/> EVPDDRGRWVPELMSADAAGTRRAHGNFMAGAGDFDAAFFGISPREALAMPQQRQALETWEALE SAGI PPETLRGSDTVGVFVGM<br/> HQQYATGRPRPEDGVDGYLLTGNTASVASGR IAYVLGLEGPALTVDTACSSSLVALHTACGSLRDGDCGLAVAGGVSVMAGPEVFTF<br/> FSRQGALSPDGRCKPFSDEADGFLGEGSAFVVLQRLSDARREGRVRLGVVAGSAVNQDGASNGLSAPSGVAQQRV IRRARARAGIT<br/> GADVAVVEAHGTGTRLDGDPVEASALLATYGKSRGSSGFPVLLGSKVSNIGHAQAAAGVAGVIKVLLGLERGVVPPMLCRGERSGLI<br/> SSGEIELADGVREWS PAADGVRRAVSAFGVSGTNAHVIIAEPPEPEFPVQPRRMLPATGVVPPVLSARTGAALRAQAGRLADHLAA<br/> HPGIAPADVSWT MARARQHFEERA AVLAA DTAEAVHRLRAVADGAVVPGVVTGSASDGGSVFVFPQGAQWEGMARELLPVVFAES<br/> IAECDAVLSEVAGFSVSEVLEPRPDAPSLERVDVVQPVLFVAVMVS LARLWRACGAVPSAVIGHQSQGEIAAAVVAGALSLEDGMRVVA<br/> RRSRARAVAGRGSMLSVRGRSDVEKLLADDSWTGRLEVA AVNGPDVAVVAGDAQAARE FLEYCEGVGIRARAI PVDYASHTAHVE<br/> PVRDELVQALAGITPRRAEV PFFSTLTGDFLDGTELDAGYWRNL RHPVEFHSVAVQALTDQGYATFIEVSPHPVLASSVQETLDDAE<br/> SDAAVLGTLERDAGDADRFLTALADAHTRGVAVDWEAVLGRAGLVDLPGYPFQGRFWLLPDRTTPRDELGWFYRVVDWEVPRSE<br/> AALRGRLVVVPEGHEEDGWTEVRSALAEAGAEPEVTRGVGGLVGDGAGVVSLLALEG DGAVQTLVLRLEDAEGIDAPLWTVTFG<br/> AVDAGSPVARPDQAKLWGLGQVASLERGPRWTGLVDLPHMPDPELRGRRLTAVLAGSE DQVAVRADAVRARRLS PAHVTTATSEYAVPG<br/> GTILVTGGTAGLGAEVARWLAGRGAEHLALVSRRGPDTEGVGDLTAE LTRLGARVSVHACDVSSREPVRELHVHGLIEQGDVVRGVVH<br/> AAGLPQQVA INDMDEAAFDEVVAAKAGGAVHLDELCSDAELFLLFSSGAGVWGSARQ GAYAAGNAFLDAFARHRRGRGLPATSVAWG<br/> LWAAGMTGDEEAVSFLRERGV RAMPVPRALAALDRVLASGETAVVVT DVDWPAFAESYTAARPRLLDRIVTTAPS ERAGEPETES<br/> LRDRLAGL PRAERTAE LVRLVRTSTATV LGHDDPKAVRATTPFEKELGFD SLAAVRLRNLLNAATGLRLPSTLVFDHPNASAVAGFLD<br/> AETGTEV RGEAPSALAGLDALAEALPEVPATEREELVQRLERMLAALRPVAQQAADASGTGANPSGDDLGEAGVDELLEALGREL DGD</p> |



B.  
KR1-  
ACP1-  
M2-TE  
(B<sub>ext</sub>)

MDEVSAALRYRIEWRPTGAGEPARLDGTWLVAKYAGTADETS TAAREALESAGARVRELVV DARCGRDELAERLR SVGEVAGVLSLLAVD  
EAEPEEAPLALASLADT LSLVQAMVSAELGCP LWTVTESAVATGPFERVRNAAHGALWGVGRVIALENPAVWGGLVDVPAGSVAELARH  
LAAVVS GGAGEDQLALRADGVY GRRWVRAAAPATDDEWKPTGTVLVTGGTGGVGGQIARWLARRGAPHLLLVSRSGPDADGAGELVAEL  
EALGARTTVAACDVTDRESVRELLGGIGDDVPLSAVFHAAATLDDGTVDTLTGERIERASRAKVLGARNLHEL TRELDLTA FVLFSSFA  
SAFGAPGLGGYAPGNAYLDGLAQRRSDGLPATAVAWGTWAGSGMAEGPVADRFRRHGVIEMPPETACRALQNALDRAEVCPIVIDVRW  
DRFLLAYTAQRPTRLFDEIDDARRAAPQAAAEPRVGAHMLASLPAPEREKALFELVRS HAAA VLGHASAERV PADQAF AELGVDLSAL  
ELRNRLGAATGVRLPTTTVFDHPDVRTLA AHLAAE G GATGAEQAAPATTAPVDEPIAIVGMACRLPGEVDS PERLWELITSGRDSAAE  
VPDDR GWVPDELMASDAAGTRRAHG NFMAGAGDFDAAFFGISPREALAMPQORQALET TWEALESAGIPPETLRGSDTGVFVGM SHQG  
YATGRPRPEDGVDGYLLTNTASVASGRIAYVLGLEGPALTVDTACSSSLVALHTACGSLRDGDCGLAVAGGVSMAGPEVFEFSRQG  
ALSPDGRCKPFSDEADG FGLGEGSAFVVLQRLSDARREGRRVLGVVAGSAVNQDGASNGLSAPSGVAQQRVIRRAWARAGITGADVAVV  
EAHGTGTRLGDPVEASALLATYGKSRGSSGPVLLGSVKS NIGHAQAAAGVAGVIK VLLGLERGVVPPMLCRGERSGLIDWSSGEIELAD  
GVREWS PAADGVRRAGVS AFGVSGTNAHVIIAEPPEPEFPVPQPRRMLPATGVV PVVLSARTGAALRAQAGRLADHLAAHPGIAPADVSW  
TMARAROHFEERA AVLAA DTAEAVHRLRAVADGAVVPGVVTGSASDGGSVFVFPGQGAQWEGMARELLPVVFAESIAECD AVLSEVAG  
FSVSEVLEPRPDAPSLERVDVVPVLFVVMVSLARLWRACGAVPSAVIGHSQGEIAAAV VVAGALSLEDGMRVVARRRAVRVAVAGR GSM  
LSVRGGRSDVEKLLADDSW TGRLEVA AVNGPD AVVVAGDAQAAREFLEYCEG V GIRARAI PVDYASHTAHVEPVRDELVQALAGITPRR  
AEVPPFFSTLTGDFLDGTELDAGYWYRNL RHPVEFHSAVQALTDQGYATFIEVSPHPV LASSVQETLDDAESDAAVLGT LERDAGDADR  
LTALADAHTRGVAVDWEAVLGRAGLVLDLPGYPFQ GKRFWLLPDR TTPRDEL DGFYRVDWTEVPRSEPAALRGRWLVVVPEGHEEDGWT  
VEVRSALAEAGAEPEVTRGVGGLVGD CAGVVSLLALEGDGAVQTLVLVRELD AEGIDAPLWTVTFGAVDAGSFPVARPDQAKLWGLGQVA  
SLERGPRTGLVDLPHMPDPELRGRLTAVLAGSE DQAVRADAVRARRLSPAHVTATSEYAVPGGTILVTGGTAGLGA EVARWLAGRGA  
EHLALVSRGPDTEGVGDLTAE LTRLGARVSVHACDVSSREPVREL VHGLIEQGDVV RGVVHAAGLPQQVA INDMDEAAFDEVVAAKAG  
GAVHLDELCSDAELFLLFSSGAGVWGSARQ GAYAAGNAFLDA FARHRRRGRGLPATSVAWGLWAAGGMTGDEEAVSFLRERGV RAMPVPR  
ALAA LDRVLASGETAVVVTDVDWPAFAESYTAARPRPLLDRI VTTAPSERAGEPETESLRDR LAGLPRAERTAE LVRVLTSTATVLGH  
DDPKAVRATTPFKELGFD SLAAVRLRNLLNAATGLRLPSTLVFDHPNASAVAGFLDAELSGT PAREASSALRDGYRQAGVSGRVRSYLD  
LLAGLSDFREHFDGSDGFSLDLVDMDADGPGEVTVICAGTA AISGPHEFTRLAGALRGIAPVRAVPQPGYEEGEPLPS SMAVA AVQAD  
AVIRTQGDKPFVVAGHSAGALMAYALATELLDRGHPPRGVVLIDVYPPGHQDAMNAWLEELTATLFDRETVRMDDTRLTALGAYDRLTG  
QWRPRETGLPTLLVSAGEPMGPWPDDSWKPTWPF EHDTVAVPGDHFTMVQEHADAIARHIDAWLGGGNSSSVDKLAAALEHHHHHH

**Table S10. Plasmids and primer used in this study.**

| Plasmid                                                     | Cloning Method                   | Fragments | Primer Name                | Primer Sequence 5'-3'                   | Template                            |
|-------------------------------------------------------------|----------------------------------|-----------|----------------------------|-----------------------------------------|-------------------------------------|
| pMK53.<br>MBP-harmM2(2)                                     | In-Fusion                        | Insert    | P-MK141                    | GCAGCTCCGGCAACCACA                      | pMK39                               |
|                                                             |                                  |           | P-MK146                    | GGATCCGGCGCCTTTTTCGAA                   |                                     |
|                                                             |                                  | Vector    | P-MK175                    | GGTTGCCGGAGCTGCGGATCCGTAGTGTGCCGCA      | pMK05                               |
|                                                             |                                  |           | P-MK143                    | GAACTGGATGGTGACTAGGATCCGGCTGCTAACAAAG   |                                     |
| pMK79.<br>ACP1-harmM2+TE-H6 (used as a template for pADD01) | In-Fusion                        | Vector1   | P-MK238                    | GGTGCACCCGGAGCCGAGCAGGCAGCTCCGGCAACCACA | pMK62                               |
|                                                             |                                  |           | P-MK240                    | GGGCGGGAGTCCCGCT                        |                                     |
|                                                             |                                  | Vector2   | P-MK153                    | AGCGGGACTCCCGCCC                        | pMK62                               |
|                                                             |                                  |           | P-MK239                    | CATATGTATATCTCCTTCTTAAAGTTAAACAAAATTA   |                                     |
|                                                             |                                  | Insert    | P-MK236                    | AAGAAGGAGATATACATATGCTGGCGTCGCTGCCCG    | pMK59                               |
|                                                             |                                  |           | P-MK237                    | CTCGGCTCCGGTCGCACCCGCGAGTTCGGCGGCCAGGT  |                                     |
| pADD01.<br>KR1-ACP1-harmM2-TE                               | In-Fusion and Restriction Digest | KR-Insert | P-MK276                    | AAGGAGATATACATATGGACGAGGTTTCCGCGCTG     | pBL13                               |
|                                                             |                                  |           | P-MK277                    | AGCGACGCCAGCATATGCGCGCCCACCCGCGGTTC     |                                     |
|                                                             |                                  | Vector    | pMK79 linearized with NdeI |                                         |                                     |
| pMK45.<br>(3)K3-AT3-Strep                                   | In-Fusion                        | Vector    | P-MK163                    | GCGGTAGGCCAGCTCGT                       | pRSG34                              |
|                                                             |                                  |           | P-MK159                    | TGAGATCCGGTAACAAAGCCC                   |                                     |
|                                                             |                                  | Insert    | P-MK161                    | TGTTACCGGATCTCAGGATCCGGCGCCTTTTTCGAA    | pAR10 (any Strep containing vector) |
|                                                             |                                  |           | P-MK164                    | GAGCTGGCCTACCGCAGCGCTTGGAGCCATCCAC      |                                     |

Plasmids pMK39 (TwinStrep-harm\_DEBSM2(2)), pMK05 (MBP\_DEBSM2(2)-H8), pMK62 ((3)harmDEBSM2+TE-H6), pMK59 (TwinStrp-DEBSACP1(2)), and pBL13<sup>2</sup> ((5)KS1-AT1-KR1-ACP1(2)) were used as templates to yield the fragments indicated in bold. For phage display analysis, the following plasmids were used: pBL12 (LLD(4)), pBL13 ((5)M1(2)), pBL16 (all plasmids, see ref. <sup>49</sup>) ((3)-M2-TE), RSG34 (ref. <sup>50</sup>) ((3)-M3-TE). Phagemid pMK22 (ACP1-(2)-phagemid) was assembled via In-Fusion cloning from pBL13 (ACP1 and docking domain (2) and the phagemid pNE.

## Supporting Movie:

**SI Movie 1: A<sub>ext</sub> relaxed conformations show high flexibility of construct A in solution.** Trajectory illustrating the 33 configurations of model A<sub>ext</sub> ranked to explain 90% of the BioEn fitting. Domain coloring: KS- blue, LD- dark gray, AT- green, KR- orange, ACP-magenta, DD- light gray.

## Supporting References:

1. Tonikian, R.; Zhang, Y.; Boone, C.; Sidhu, S. S., (2007) Identifying specificity profiles for peptide recognition modules from phage-displayed peptide libraries. *Nat Protoc* 2, 1368-1386.
2. Rittner, A.; Paithankar, K. S.; Drexler, D. J.; Himmler, A.; Grininger, M., (2019) Probing the modularity of megasynthases by rational engineering of a fatty acid synthase Type I. *Protein Sci* 28, 414-428.
3. Hughes, A. J.; Keatinge-Clay, A., (2011) Enzymatic extender unit generation for in vitro polyketide synthase reactions: structural and functional showcasing of *Streptomyces coelicolor* MatB. *Chem Biol* 18, 165-176.
4. Sharma, K. K.; Boddy, C. N., (2007) The thioesterase domain from the pimarin and erythromycin biosynthetic pathways can catalyze hydrolysis of simple thioester substrates. *Bioorg Med Chem Lett* 17, 3034-3037.
5. Peter, D. M.; Schada von Borzyskowski, L.; Kiefer, P.; Christen, P.; Vorholt, J. A.; Erb, T. J., (2015) Screening and Engineering the Synthetic Potential of Carboxylating Reductases from Central Metabolism and Polyketide Biosynthesis. *Angewandte Chemie International Edition* 54, 13457-13461.
6. Li, X.; Sevillano, N.; La Greca, F.; Deis, L.; Liu, Y. C.; Deller, M. C.; Mathews, II; Matsui, T.; Cane, D. E.; Craik, C. S.; Khosla, C., (2018) Structure-Function Analysis of the Extended Conformation of a Polyketide Synthase Module. *J Am Chem Soc* 140, 6518-6521.
7. Peter, D. M.; Schada von Borzyskowski, L.; Kiefer, P.; Christen, P.; Vorholt, J. A.; Erb, T. J., (2015) Screening and Engineering the Synthetic Potential of Carboxylating Reductases from Central Metabolism and Polyketide Biosynthesis. *Angew Chem Int Ed Engl* 54, 13457-13461.
8. Pernot, P.; Round, A.; Barrett, R.; De Maria Antolinos, A.; Gobbo, A.; Gordon, E.; Huet, J.; Kieffer, J.; Lentini, M.; Mattenet, M.; Morawe, C.; Mueller-Dieckmann, C.; Ohlsson, S.; Schmid, W.; Surr, J.; Theveneau, P.; Zerrad, L.; McSweeney, S., (2013) Upgraded ESRF BM29 beamline for SAXS on macromolecules in solution. *J Synchrotron Radiat* 20, 660-664.
9. Yang, B.; Wu, Y. J.; Zhu, M.; Fan, S. B.; Lin, J.; Zhang, K.; Li, S.; Chi, H.; Li, Y. X.; Chen, H. F.; Luo, S. K.; Ding, Y. H.; Wang, L. H.; Hao, Z.; Xiu, L. Y.; Chen, S.; Ye, K.; He, S. M.; Dong, M. Q., (2012) Identification of cross-linked peptides from complex samples. *Nat Methods* 9, 904-906.
10. Sali, A.; Blundell, T. L., (1993) Comparative protein modelling by satisfaction of spatial restraints. *J Mol Biol* 234, 779-815.
11. Tang, Y.; Chen, A. Y.; Kim, C. Y.; Cane, D. E.; Khosla, C., (2007) Structural and mechanistic analysis of protein interactions in module 3 of the 6-deoxyerythronolide B synthase. *Chem Biol* 14, 931-943.
12. Tang, Y.; Kim, C.-Y.; Mathews, I. I.; Cane, D. E.; Khosla, C., (2006) The 2.7-Å crystal structure of a 194-kDa homodimeric fragment of the 6-deoxyerythronolide B synthase. *Proc Natl Acad Sci U S A*. 103, 11124-11129.
13. Keatinge-Clay, A. T.; Stroud, R. M., (2006) The structure of a ketoreductase determines the organization of the  $\beta$ -carbon processing enzymes of modular polyketide synthases. *Structure* 14, 737-748.
14. Alekseyev, V. Y.; Liu, C. W.; Cane, D. E.; Puglisi, J. D.; Khosla, C., (2007) Solution structure and proposed domain domain recognition interface of an acyl carrier protein domain from a modular polyketide synthase. *Protein Sci* 16, 2093-2107.
15. Broadhurst, R. W.; Nietlispach, D.; Wheatcroft, M. P.; Leadlay, P. F.; Weissman, K. J., (2003) The structure of docking domains in modular polyketide synthases. *Chem Biol* 10, 723-731.
16. Quijcho, F. A.; Spurlino, J. C.; Rodseth, L. E., (1997) Extensive features of tight oligosaccharide binding revealed in high-resolution structures of the maltodextrin transport/chemosensory receptor. *Structure* 5, 997-1015.

17. Tsai, S. C.; Miercke, L. J.; Krucinski, J.; Gokhale, R.; Chen, J. C.; Foster, P. G.; Cane, D. E.; Khosla, C.; Stroud, R. M., (2001) Crystal structure of the macrocycle-forming thioesterase domain of the erythromycin polyketide synthase: versatility from a unique substrate channel. *Proc Natl Acad Sci U S A* 98, 14808-14813.
18. DeLano, W. L., (2002) Pymol: An open-source molecular graphics tool. *CCP4 Newsletter On Protein Crystallography* 40, 82-92.
19. Edwards, A. L.; Matsui, T.; Weiss, T. M.; Khosla, C., (2014) Architectures of whole-module and bimodular proteins from the 6-deoxyerythronolide B synthase. *J Mol Biol* 426, 2229-2245.
20. Pettersen, E. F.; Goddard, T. D.; Huang, C. C.; Couch, G. S.; Greenblatt, D. M.; Meng, E. C.; Ferrin, T. E., (2004) UCSF Chimera--a visualization system for exploratory research and analysis. *J Comput Chem* 25, 1605-1612.
21. Whicher, J. R.; Dutta, S.; Hansen, D. A.; Hale, W. A.; Chemler, J. A.; Dosey, A. M.; Narayan, A. R.; Håkansson, K.; Sherman, D. H.; Smith, J. L.; Skiniotis, G., (2014) Structural rearrangements of a polyketide synthase module during its catalytic cycle. *Nature* 510, 560-564.
22. Dutta, S.; Whicher, J. R.; Hansen, D. A.; Hale, W. A.; Chemler, J. A.; Congdon, G. R.; Narayan, A. R.; Håkansson, K.; Sherman, D. H.; Smith, J. L.; Skiniotis, G., (2014) Structure of a modular polyketide synthase. *Nature* 510, 512-517.
23. Kim, Y. C.; Hummer, G., (2008) Coarse-grained models for simulations of multiprotein complexes: application to ubiquitin binding. *J Mol Biol* 375, 1416-1433.
24. Schneidman-Duhovny, D.; Hammel, M.; Tainer, J. A.; Sali, A., (2013) Accurate SAXS profile computation and its assessment by contrast variation experiments. *Biophys J* 105, 962-974.
25. Schneidman-Duhovny, D.; Hammel, M.; Tainer, J. A.; Sali, A., (2016) FoXS, FoXSDock and MultiFoXS: Single-state and multi-state structural modeling of proteins and their complexes based on SAXS profiles. *Nucleic Acids Res* 44, W424-429.
26. Różycki, B.; Kim, Y. C.; Hummer, G., (2011) SAXS ensemble refinement of ESCRT-III CHMP3 conformational transitions. *Structure* 19, 109-116.
27. Köfinger, J.; Stelzl, L. S.; Reuter, K.; Allande, C.; Reichel, K.; Hummer, G., (2019) Efficient Ensemble Refinement by Reweighting. *J Chem Theory Comput* 15, 3390-3401.
28. Hummer, G.; Köfinger, J., (2015) Bayesian ensemble refinement by replica simulations and reweighting. *J Chem Phys* 143, 243150.
29. Svergun, D., (1992) Determination of the regularization parameter in indirect-transform methods using perceptual criteria. *Journal of Applied Crystallography* 25, 495-503.
30. Oliphant, T. E., *A guide to NumPy. vol. 1* Tregol Publishing USA: 2006.
31. Jones, E.; Oliphant, T. E.; Peterson, P., *SciPy: Open source scientific tools for Python*. 2001.
32. McKinney, W.; and others. . in Proceedings of the 9th Python in Science Conference 51--56 (Austin, T., 2010). Data structures for statistical computing in python. In *Proceedings of the 9th Python in Science Conference 51--56* Austin, TX, 2010.
33. Gowers, R. J.; Linke, M.; Barnoud, J.; Reddy, T. J. E.; Melo, M. N.; Seyler, S. L.; Dotson, D. L.; Domanski, J.; Buchoux, S.; Kenney, I. M.; Beckstein, O., (2016) MDAnalysis: A Python package for the rapid analysis of molecular dynamics simulations. *Proceedings of the 15th Python in Science Conference*, 102-109.
34. Michaud-Agrawal, N.; Denning, E. J.; Woolf, T. B.; Beckstein, O., (2011) MDAnalysis: a toolkit for the analysis of molecular dynamics simulations. *J Comput Chem* 32, 2319-2327.
35. Hunter, J. D., (2007) A 2D Graphics Environment. *Computing in Science & Engineering* 9, 90-95.
36. Humphrey, W.; Dalke, A.; Schulten, K., (1996) VMD: visual molecular dynamics. *J Mol Graph* 14, 33-38, 27-38.
37. Grishaev, A., (2012) Sample preparation, data collection, and preliminary data analysis in biomolecular solution X-ray scattering. *Curr Protoc Protein Sci Chapter 17*, Unit17.14.
38. Herbst, D. A.; Jakob, R. P.; Zahringer, F.; Maier, T., (2016) Mycocerosic acid synthase exemplifies the architecture of reducing polyketide synthases. *Nature* 531, 533-537.
39. Rambo, R. P.; Tainer, J. A., (2013) Accurate assessment of mass, models and resolution by small-angle scattering. *Nature* 496, 477-481.
40. Piiadov, V.; Ares de Araújo, E.; Oliveira Neto, M.; Craievich, A. F.; Polikarpov, I., (2019) SAXSMoW 2.0: Online calculator of the molecular weight of proteins in dilute solution from experimental SAXS data measured on a relative scale. *Protein Science* 28, 454-463.
41. Hansen, S., (2000) Bayesian estimation of hyperparameters for indirect Fourier transformation in small-angle scattering. *J Appl Crystallogr* 33, 1415-1421.

42. Hopkins, J. B.; Gillilan, R. E.; Skou, S., (2017) BioXTAS RAW: improvements to a free open-source program for small-angle X-ray scattering data reduction and analysis. *J Appl Crystallogr* 50, 1545-1553.
43. Klaus, M.; D'Souza, A. D.; Nivina, A.; Khosla, C.; Grninger, M., (2019) Engineering of Chimeric Polyketide Synthases Using SYNZIP Docking Domains. *ACS Chem Biol* 14, 426-433.
44. Klaus, M.; Buyachuihan, L.; Grninger, M., (2020) Ketosynthase Domain Constrains the Design of Polyketide Synthases. *ACS Chem Biol* 15, 2422-2432.
45. Needleman, S. B.; Wunsch, C. D., (1970) A general method applicable to the search for similarities in the amino acid sequence of two proteins. *J Mol Biol* 48, 443-453.
46. Zhang, G.; Ignatova, Z., (2009) Generic algorithm to predict the speed of translational elongation: implications for protein biogenesis. *PLoS One* 4, e5036.
47. Rittner, A.; Paithankar, K. S.; Huu, K. V.; Grninger, M., (2018) Characterization of the Polyspecific Transferase of Murine Type I Fatty Acid Synthase (FAS) and Implications for Polyketide Synthase (PKS) Engineering. *ACS Chem Biol* 13, 723-732.
48. Krissinel, E.; Henrick, K., (2007) Inference of macromolecular assemblies from crystalline state. *J Mol Biol* 372, 774-797.
49. Lowry, B.; Robbins, T.; Weng, C. H.; O'Brien, R. V.; Cane, D. E.; Khosla, C., (2013) In vitro reconstitution and analysis of the 6-deoxyerythronolide B synthase. *J Am Chem Soc* 135, 16809-16812.
50. Gokhale, R.; Tsuji, S.; Cane, D.; Khosla, C., (1999) Dissecting and exploiting intermodular communication in polyketide synthases. *Science* 284, 482-485.
